# Supplementary material
Source: PubMed Central journal article supplement (PMC8328033)
Supplement: noab072_suppl_supplementary_material.pdf [file noab072_suppl_supplementary_material.pdf]

**Supplementary Table 1. Overview of glioma studies in discovery set**

|                                           | TOTAL  |          | Glioma International Case Control Study [1] |          | MD Anderson GWAS [2, 3]                    |                 | San Francisco Adult Glioma Study [4]                        |          | Gliomascan [5]                                                                                                                                                                 |          | UK GWAS [2, 3, 6]    |          | German GWAS [3]                                                                   |          | French GWAS [3, 6]                 |                 | USCF-Mayo [1, 4, 7, 8]                    |          |
|-------------------------------------------|--------|----------|---------------------------------------------|----------|--------------------------------------------|-----------------|-------------------------------------------------------------|----------|--------------------------------------------------------------------------------------------------------------------------------------------------------------------------------|----------|----------------------|----------|-----------------------------------------------------------------------------------|----------|------------------------------------|-----------------|-------------------------------------------|----------|
|                                           | Cases  | Controls | Cases                                       | Controls | Cases                                      | Controls        | Cases                                                       | Controls | Cases                                                                                                                                                                          | Controls | Cases                | Controls | Cases                                                                             | Controls | Cases                              | Controls        | Cases                                     | Controls |
| <b>Total<sup>a</sup></b>                  | 12,455 | 18,169   | 4,564                                       | 3,265    | 1,175                                      | 2,236           | 677                                                         | 3,940    | 1,652                                                                                                                                                                          | 2,725    | 631                  | 2,699    | 846                                                                               | 1,310    | 1,423                              | 1,190           | 1,519                                     | 804      |
| <i>GB</i>                                 | 6,183  | --       | 2,460                                       | --       | 652                                        | --              | 511                                                         | --       | 903                                                                                                                                                                            | --       | 270                  | --       | 431                                                                               | --       | 430                                | --              | 526                                       | --       |
| <i>Non-GB</i>                             | 5,820  | --       | 1,898                                       | --       | 523                                        | --              | 166                                                         | --       | 472                                                                                                                                                                            | --       | 361                  | --       | 415                                                                               | --       | 993                                | --              | 992                                       | --       |
| <i>WHO grade II-III Astrocytoma</i>       | --     | --       | 894                                         | --       | 243                                        | --              | 166                                                         | --       | 235                                                                                                                                                                            | --       | **                   | --       | **                                                                                | --       | **                                 | --              | **                                        | --       |
| <i>WHO grade II-III Oligodendroglioma</i> | --     | --       | 576                                         | --       | 149                                        | --              | 0                                                           | --       | 157                                                                                                                                                                            | --       | **                   | --       | **                                                                                | --       | **                                 | --              | **                                        | --       |
| <b>Sex</b>                                |        |          |                                             |          |                                            |                 |                                                             |          |                                                                                                                                                                                |          |                      |          |                                                                                   |          |                                    |                 |                                           |          |
| <i>Male</i>                               | 7,513  | 6,487    | 2,733                                       | 1,868    | 771                                        | 1,094           | 440                                                         | 1,553    | 943                                                                                                                                                                            | 1,465    | 394                  | **       | 474                                                                               | **       | 816                                | **              | 942                                       | 507      |
| <i>Female</i>                             | 5,046  | 6,483    | 1,831                                       | 1,397    | 476                                        | 1,142           | 237                                                         | 2,387    | 709                                                                                                                                                                            | 1,260    | 237                  | **       | 372                                                                               | **       | 607                                | **              | 577                                       | 297      |
| <b>Mean Age</b>                           | --     | --       | 54                                          | 54       | 46                                         | ** <sup>b</sup> | 54                                                          | 33       | 56                                                                                                                                                                             | 67       | 46 <sup>c</sup>      |          | 51 <sup>c</sup>                                                                   |          | 48 <sup>c</sup>                    | ** <sup>d</sup> | 54                                        | 54       |
| <b>Array</b>                              | --     | --       | Illumina Oncoarray                          |          | Illumina610Q                               |                 | Illumina370D                                                |          | Illumina 610Q, Illumina 550K, Illumina 660W                                                                                                                                    |          | Illumina 610Q        |          | Illumina 610Q                                                                     |          | Illumina 610Q                      |                 | Illumina Oncoarray                        |          |
| <b>Source of controls</b>                 | --     |          | Clinic and population-based                 |          | CGEMS breast and prostate controls [9, 10] |                 | Population-based controls and Illumina IControlDB IControls |          | Cases and matched controls from: AHS, CLUE, CPS-II, CoSM/SMC, GLIOGENE, HPFS, INT-SD, MCCS, MEC, NCI-BTS, NHS, NIOSH-UMHS, NSHDS, NYUWHS, PHS, PLCO, SMWHS, VITAL, WHS [11-28] |          | 1958 UK birth cohort |          | Three population studies: KORA, POPGEN, and the Heinz Nixdorf Recall study[29-31] |          | ascertained from the SU.VI.MA [32] |                 | Mayo Clinic general medical exam controls |          |

<sup>a</sup> Histology information not available for all cases and frequencies may not add to 100%

<sup>b</sup> Continuous age is not available, age distribution in males is 50-59: 12.3%, 60-69: 56.7%, 70-79: 30.7%, 80-89: 0.3% and age distribution in females is: 0-54: 4.3%, 55-59: 15.0%, 60-64: 23.6%, 65-69: 27.5%, 70-74: 19.0%, 75-79: 10.7%;

<sup>c</sup> Age data available only for pooled sample

<sup>d</sup> women aged 35–60 years; men aged 45–60 years

**Supplementary Table 2. Overview of included studies of immune and atopic traits**

| Autoimmune or atopic disease                         | N       | Cases  | Controls | Sample Prevalence | Population Prevalence | Without HLA region                  |           |                 |                |                    | With HLA region                     |           |                 |                |                  |
|------------------------------------------------------|---------|--------|----------|-------------------|-----------------------|-------------------------------------|-----------|-----------------|----------------|--------------------|-------------------------------------|-----------|-----------------|----------------|------------------|
|                                                      |         |        |          |                   |                       | Heritability (h <sup>2</sup> ) (SE) | $\lambda$ | Max( $\chi^2$ ) | Intercept (SE) | Ratio <sup>a</sup> | Heritability (h <sup>2</sup> ) (SE) | $\lambda$ | Max( $\chi^2$ ) | Intercept (SE) | Ratio            |
| <b>Auto-immune diseases</b>                          |         |        |          |                   |                       |                                     |           |                 |                |                    |                                     |           |                 |                |                  |
| Celiac disease (Dubois, et al. 2010) [33]            | 15,283  | 4,533  | 10,750   | 29.66%            | 0.74%[34]             | 0.16 (0.01) <sup>b</sup>            | 1.11      | 1.14            | 1.06 (0.01)    | 0.47 (0.07)        | 0.16 (0.00) <sup>b</sup>            | 1.11      | 1.14            | 1.06 (0.01)    | 0.47 (0.07)      |
| Crohn's disease (ICD-10: K50) (UK Biobank) [35]      | 361,194 | 968    | 360,226  | 0.27%             | 0.22%[35]             | 0.19 (0.05) <sup>c</sup>            | 1.04      | 1.04            | 1.0 (0.01)     | 0.05 (0.20)        | 0.19 (0.05) <sup>c</sup>            | 1.04      | 1.04            | 1.00 (0.01)    | 0.06 (0.20)      |
| Lupus (Bentham, et al. 2015) [36]                    | 13,210  | 7,219  | 5,991    | 54.65%            | 0.08%[37]             | 0.13 (0.01) <sup>b</sup>            | 1.17      | 1.22            | 1.11 (0.01)    | 0.50 (0.05)        | 0.21 (0.00) <sup>b</sup>            | 1.17      | 1.27            | 1.09 (0.02)    | 0.33 (0.07)      |
| Multiple sclerosis (IMSGC, et al. 2011) [38]         | 27,148  | 9,772  | 17,376   | 36.00%            | 0.15%[39]             | 0.02 (0.01) <sup>b</sup>            | 1.03      | 1.08            | 1.06 (0.01)    | 0.66 (0.12)        | 0.05 (0.00) <sup>b</sup>            | 1.04      | 1.11            | 1.06 (0.01)    | 0.51 (0.09)      |
| Primary biliary cirrhosis (Cordel, et al. 2015) [40] | 13,239  | 2,764  | 10,475   | 20.88%            | 0.04%[41]             | 0.18 (0.01) <sup>b</sup>            | 1.05      | 1.11            | 1.00 (0.01)    | 0.03 (0.10)        | 0.19 (0.00)                         | 1.06      | 1.12            | 1.01 (0.01)    | 0.05 (0.10)      |
| Psoriasis (ICD-10: L40) (UK Biobank) [35]            | 361,194 | 487    | 360,707  | 0.13%             | 3.10%[42]             | 0.26 (0.11) <sup>c</sup>            | 1.02      | 1.02            | 0.99 (0.01)    | < 0 <sup>d</sup>   | 0.30 (0.11) <sup>c</sup>            | 1.02      | 1.03            | 0.99 (0.01)    | < 0 <sup>d</sup> |
| Rheumatoid arthritis (UK Biobank) [35]               | 361,194 | 1,605  | 359,589  | 0.44%             | 0.55%[43]             | 0.08 (0.04)                         | 1.02      | 1.02            | 1.00 (0.01)    | 0.08 (0.30)        | 0.10 (0.04) <sup>c</sup>            | 1.02      | 1.03            | 1.00 (0.01)    | 0.13 (0.26)      |
| Type 1 diabetes (UK Biobank) [35]                    | 361,194 | 583    | 360,611  | 0.16%             | 0.50%[44]             | 0.19 (0.09) <sup>c</sup>            | 1.02      | 1.02            | 0.99 (0.01)    | < 0 <sup>d</sup>   | 0.28 (0.11) <sup>c</sup>            | 1.02      | 1.03            | 1.00 (0.01)    | < 0 <sup>d</sup> |
| Ulcerative colitis (Jostins, et al. 2012) [45]       | 27,728  | 6,945  | 20,783   | 25.05%            | 0.29%[46]             | 0.13 (0.01) <sup>b</sup>            | 1.24      | 1.30            | 1.17 (0.01)    | 0.57 (0.05)        | 0.13 (0.00) <sup>b</sup>            | 1.24      | 1.30            | 1.17 (0.01)    | 0.57 (0.05)      |
| <b>Atopic diseases (UK Biobank) [35]</b>             |         |        |          |                   |                       |                                     |           |                 |                |                    |                                     |           |                 |                |                  |
| Hayfever or allergic rhinitis (doctor diagnosed)     | 91,787  | 20,904 | 70,883   | 22.77%            | 7.70%[47]             | 0.09 (0.04) <sup>c</sup>            | 1.04      | 1.04            | 1.01 (0.01)    | 0.23 (0.22)        | 0.10 (0.04)                         | 1.04      | 1.04            | 1.01 (0.01)    | 0.21 (0.21)      |
| Asthma (ICD-10: J45)                                 | 361,194 | 1,993  | 359,501  | 0.55%             | 13.60%[47]            | 0.06 (0.02) <sup>c</sup>            | 1.06      | 1.08            | 1.02 (0.01)    | 0.28 (0.11)        | 0.06 (0.02)                         | 1.06      | 1.09            | 1.03 (0.01)    | 0.29 (0.11)      |
| Eczema (self-report)                                 | 361,141 | 9,321  | 351,820  | 2.58%             | 7.90%[48]             | 0.16 (0.02) <sup>c</sup>            | 1.12      | 1.16            | 1.00 (0.01)    | 0.02 (0.06)        | 0.16 (0.02)                         | 1.13      | 1.17            | 1.00 (0.01)    | 0.01 (0.06)      |
| <b>Complete blood count traits (UK Biobank) [35]</b> |         |        |          |                   |                       |                                     |           |                 |                |                    |                                     |           |                 |                |                  |
| Basophil count                                       | 349856  | --     | --       | --                | --                    | 0.02 (0.00)                         | 1.20      | 1.27            | 1.10 (0.01)    | 0.40 (0.04)        | 0.13 (0.02)                         | 1.20      | 1.27            | 1.10 (0.01)    | 0.36 (0.04)      |
| Basophil percentage                                  | 349861  | --     | --       | --                | --                    | 0.05 (0.01)                         | 1.18      | 1.39            | 1.05 (0.02)    | 0.14 (0.05)        | 0.13 (0.02)                         | 1.14      | 1.25            | 1.03 (0.02)    | 0.11 (0.06)      |
| Eosinophil count                                     | 349856  | --     | --       | --                | --                    | 0.16 (0.02)                         | 1.53      | 2.39            | 1.10 (0.05)    | 0.08 (0.04)        | 0.17 (0.02)                         | 1.53      | 2.46            | 1.10 (0.05)    | 0.07 (0.04)      |
| Eosinophil percentage                                | 349861  | --     | --       | --                | --                    | 0.19 (0.02)                         | 1.53      | 2.59            | 1.10 (0.06)    | 0.07 (0.04)        | 0.19 (0.02)                         | 1.53      | 2.62            | 1.12 (0.06)    | 0.07 (0.04)      |
| Haematocrit percentage                               | 350475  | --     | --       | --                | --                    | 0.13 (0.01)                         | 1.61      | 2.23            | 1.21 (0.05)    | 0.18 (0.04)        | 0.14 (0.02)                         | 1.61      | 2.33            | 1.21 (0.06)    | 0.16 (0.05)      |
| Haemoglobin concentration                            | 350474  | --     | --       | --                | --                    | 0.14 (0.01)                         | 1.63      | 2.29            | 1.22 (0.05)    | 0.18 (0.04)        | 0.16 (0.02)                         | 1.63      | 2.48            | 1.19 (0.08)    | 0.13 (0.05)      |
| High light scatter reticulocyte count                | 344729  | --     | --       | --                | --                    | 0.18 (0.02)                         | 1.20      | 1.26            | 1.21 (0.08)    | 0.13 (0.05)        | 0.19 (0.02)                         | 1.77      | 2.73            | 1.23 (0.10)    | 0.13 (0.06)      |
| High light scatter reticulocyte percentage           | 344729  | --     | --       | --                | --                    | 0.18 (0.02)                         | 1.18      | 1.38            | 1.21 (0.08)    | 0.13 (0.05)        | 0.13 (0.02)                         | 1.30      | 1.58            | 1.07 (0.04)    | 0.13 (0.07)      |
| Immature reticulocyte fraction                       | 344728  | --     | --       | --                | --                    | 0.11 (0.01)                         | 1.52      | 2.37            | 1.20 (0.07)    | 0.19 (0.07)        | 0.12 (0.01)                         | 1.51      | 2.11            | 1.21 (0.09)    | 0.19 (0.08)      |
| Lymphocyte count                                     | 349856  | --     | --       | --                | --                    | 0.18 (0.01)                         | 1.52      | 2.59            | 1.14 (0.04)    | 0.09 (0.03)        | 0.20 (0.02)                         | 1.72      | 2.69            | 1.14 (0.05)    | 0.08 (0.03)      |
| Lymphocyte percentage                                | 349861  | --     | --       | --                | --                    | 0.15 (0.01)                         | 1.60      | 2.19            | 1.12 (0.04)    | 0.10 (0.03)        | 0.15 (0.01)                         | 1.56      | 2.25            | 1.14 (0.04)    | 0.11 (0.03)      |
| Mean corpuscular haemoglobin                         | 350472  | --     | --       | --                | --                    | 0.21 (0.02)                         | 1.61      | 2.25            | 1.19 (0.08)    | 0.11 (0.05)        | 0.27 (0.05)                         | 1.55      | 3.24            | 1.08 (0.12)    | 0.04 (0.05)      |
| Mean corpuscular haemoglobin concentration           | 350468  | --     | --       | --                | --                    | 0.05 (0.01)                         | 1.73      | 2.60            | 1.04 (0.02)    | 0.10 (0.05)        | 0.07 (0.01)                         | 1.23      | 1.53            | 1.01 (0.04)    | 0.02 (0.08)      |
| Mean corpuscular volume                              | 350473  | --     | --       | --                | --                    | 0.21 (0.02)                         | 1.70      | 2.57            | 1.23 (0.09)    | 0.13 (0.05)        | 0.26 (0.04)                         | 1.60      | 3.18            | 1.15 (0.10)    | 0.07 (0.05)      |
| Mean platelet (thrombocyte) volume                   | 350470  | --     | --       | --                | --                    | 0.28 (0.03)                         | 1.49      | 2.05            | 1.30 (0.10)    | 0.13 (0.04)        | 0.13 (0.02)                         | 1.58      | 3.66            | 1.18 (0.12)    | 0.07 (0.04)      |
| Mean reticulocyte volume                             | 344728  | --     | --       | --                | --                    | 0.17 (0.02)                         | 1.69      | 2.51            | 1.20 (0.08)    | 0.14 (0.05)        | 0.19 (0.02)                         | 1.47      | 2.60            | 1.20 (0.08)    | 0.13 (0.05)      |
| Mean spheroid cell volume                            | 344729  | --     | --       | --                | --                    | 0.17 (0.02)                         | 1.54      | 2.21            | 1.22 (0.07)    | 0.15 (0.05)        | 0.13 (0.02)                         | 1.55      | 2.54            | 1.20 (0.08)    | 0.13 (0.05)      |
| Monocyte count                                       | 349856  | --     | --       | --                | --                    | 0.18 (0.02)                         | 1.53      | 2.75            | 1.26 (0.07)    | 0.17 (0.04)        | 0.18 (0.02)                         | 1.59      | 2.63            | 1.26 (0.07)    | 0.16 (0.04)      |

|                                                 |        |    |    |    |    |              |      |      |             |                  |             |      |      |             |                  |
|-------------------------------------------------|--------|----|----|----|----|--------------|------|------|-------------|------------------|-------------|------|------|-------------|------------------|
| Monocyte percentage                             | 349861 | -- | -- | -- | -- | 0.16 (0.02)  | 1.22 | 1.43 | 1.22 (0.07) | 0.17 (0.05)      | 0.16 (0.02) | 1.46 | 2.37 | 1.23 (0.07) | 0.17 (0.05)      |
| Neutrophil count                                | 349856 | -- | -- | -- | -- | 0.15 (0.01)  | 1.58 | 2.79 | 1.12 (0.03) | 0.10 (0.03)      | 0.17 (0.02) | 1.64 | 2.37 | 1.11 (0.05) | 0.08 (0.03)      |
| Neutrophil percentage                           | 349861 | -- | -- | -- | -- | 0.14 (0.01)  | 1.58 | 3.30 | 1.10 (0.04) | 0.09 (0.03)      | 0.13 (0.02) | 1.51 | 2.10 | 1.10 (0.04) | 0.09 (0.04)      |
| Nucleated red blood cell count                  | 349848 | -- | -- | -- | -- | -0.00 (0.00) | 1.46 | 2.46 | 1.00 (0.01) | < 0 <sup>d</sup> | 0.13 (0.02) | 1.00 | 1.00 | 1.00 (0.01) | < 0 <sup>d</sup> |
| Nucleated red blood cell percentage             | 349845 | -- | -- | -- | -- | -0.00 (0.00) | 1.54 | 2.47 | 1.00 (0.01) | < 0 <sup>d</sup> | 0.13 (0.02) | 0.99 | 0.99 | 1.00 (0.01) | < 0 <sup>d</sup> |
| Platelet count                                  | 350474 | -- | -- | -- | -- | 0.25 (0.02)  | 1.56 | 2.50 | 1.20 (0.05) | 0.10 (0.03)      | 0.27 (0.02) | 1.73 | 3.14 | 1.16 (0.06) | 0.07 (0.03)      |
| Platelet crit                                   | 350471 | -- | -- | -- | -- | 0.21 (0.02)  | 1.44 | 2.34 | 1.23 (0.05) | 0.13 (0.03)      | 0.22 (0.02) | 1.70 | 2.78 | 1.20 (0.05) | 0.11 (0.03)      |
| Platelet distribution width                     | 350470 | -- | -- | -- | -- | 0.20 (0.02)  | 1.63 | 2.25 | 1.17 (0.07) | 0.10 (0.04)      | 0.13 (0.02) | 1.46 | 2.63 | 1.14 (0.08) | 0.09 (0.05)      |
| Red blood cell (erythrocyte) count              | 350475 | -- | -- | -- | -- | 0.19 (0.02)  | 1.52 | 2.13 | 1.23 (0.06) | 0.14 (0.03)      | 0.20 (0.02) | 1.73 | 2.76 | 1.23 (0.06) | 0.13 (0.04)      |
| Red blood cell (erythrocyte) distribution width | 350473 | -- | -- | -- | -- | 0.20 (0.02)  | 1.00 | 1.00 | 1.09 (0.06) | 0.06 (0.04)      | 0.22 (0.03) | 1.50 | 2.73 | 1.06 (0.08) | 0.03 (0.05)      |
| Reticulocyte count                              | 344729 | -- | -- | -- | -- | 0.18 (0.02)  | 0.99 | 0.99 | 1.18 (0.07) | 0.11 (0.04)      | 0.13 (0.02) | 1.33 | 1.60 | 1.06 (0.04) | 0.10 (0.06)      |
| Reticulocyte percentage                         | 344728 | -- | -- | -- | -- | 0.17 (0.02)  | 1.70 | 3.01 | 1.16 (0.07) | 0.11 (0.04)      | 0.19 (0.02) | 1.68 | 2.63 | 1.17 (0.09) | 0.10 (0.05)      |
| White blood cell (leukocyte) count              | 350470 | -- | -- | -- | -- | 0.18 (0.02)  | 1.68 | 2.68 | 1.13 (0.04) | 0.09 (0.03)      | 0.20 (0.02) | 1.76 | 2.64 | 1.12 (0.05) | 0.08 (0.03)      |

<sup>a</sup> Calculated as:  $\frac{(intercept-1)}{mean(\chi^2)-1}$ .

<sup>b</sup> Liability-adjusted heritability

<sup>c</sup> Adjusted using prevalence of trait in UK Biobank

<sup>d</sup> Not able to be calculated

**Supplementary Table 3. Coefficients, standard errors, and p values for GTex cell lines used for cell-type specific analyses individually and harmonic mean p (p<sub>HM</sub>) within tissue category, bold indicates p<0.05**

| Category     | Cell line                                | All glioma             |                        |                      |                      | GB                    |                        |                      |        | Non-GB               |                        |                      |        |        |                      |                      |        |
|--------------|------------------------------------------|------------------------|------------------------|----------------------|----------------------|-----------------------|------------------------|----------------------|--------|----------------------|------------------------|----------------------|--------|--------|----------------------|----------------------|--------|
|              |                                          | p <sub>HM</sub>        | Coefficient            | SE                   | P                    | p <sub>HM</sub>       | Coefficient            | SE                   | P      | p <sub>HM</sub>      | Coefficient            | SE                   | P      |        |                      |                      |        |
| Adipose      | Subcutaneous fat abdominal               | 0.3578                 | 7.5x10 <sup>-9</sup>   | 9.1x10 <sup>-9</sup> | 0.2057               | 0.2599                | 2.8x10 <sup>-9</sup>   | 1.1x10 <sup>-8</sup> | 0.4013 | 0.3859               | 1.6x10 <sup>-8</sup>   | 1.3x10 <sup>-8</sup> | 0.1147 |        |                      |                      |        |
|              | Subcutaneous fat                         |                        | 7.7x10 <sup>-9</sup>   | 8.8x10 <sup>-9</sup> | 0.1903               |                       | -9.4x10 <sup>-10</sup> | 1.1x10 <sup>-8</sup> | 0.5356 |                      | 1.6x10 <sup>-8</sup>   | 1.3x10 <sup>-8</sup> | 0.1138 |        |                      |                      |        |
|              | Adipocytes                               |                        | -4x10 <sup>-9</sup>    | 7.9x10 <sup>-9</sup> | 0.6937               |                       | -1.8x10 <sup>-9</sup>  | 1.1x10 <sup>-8</sup> | 0.5670 |                      | -8.7x10 <sup>-9</sup>  | 1x10 <sup>-8</sup>   | 0.8042 |        |                      |                      |        |
|              | Adipose subcutaneous                     |                        | 9.2x10 <sup>-9</sup>   | 8.1x10 <sup>-9</sup> | 0.1283               |                       | 1.6x10 <sup>-8</sup>   | 1x10 <sup>-8</sup>   | 0.0570 |                      | -3.7x10 <sup>-9</sup>  | 9.2x10 <sup>-9</sup> | 0.6568 |        |                      |                      |        |
|              | Adipose visceral (omentum)               |                        | 7.1x10 <sup>-9</sup>   | 9.5x10 <sup>-9</sup> | 0.2275               |                       | 1.4x10 <sup>-8</sup>   | 1.3x10 <sup>-8</sup> | 0.1294 |                      | -9.3x10 <sup>-10</sup> | 9.6x10 <sup>-9</sup> | 0.5387 |        |                      |                      |        |
| Blood/Immune | Synovial fluid                           | 0.6660                 | -6.4x10 <sup>-10</sup> | 1x10 <sup>-8</sup>   | 0.5249               | 0.5887                | 9x10 <sup>-9</sup>     | 1.3x10 <sup>-8</sup> | 0.2368 | 0.7261               | -9.4x10 <sup>-9</sup>  | 1.4x10 <sup>-8</sup> | 0.7463 |        |                      |                      |        |
|              | Lymph nodes                              |                        | -2.4x10 <sup>-9</sup>  | 8.8x10 <sup>-9</sup> | 0.6084               |                       | -1.3x10 <sup>-8</sup>  | 1x10 <sup>-8</sup>   | 0.9100 |                      | -1.2x10 <sup>-10</sup> | 1.2x10 <sup>-8</sup> | 0.5043 |        |                      |                      |        |
|              | Lymphoid tissue                          |                        | -1.8x10 <sup>-9</sup>  | 8.5x10 <sup>-9</sup> | 0.5856               |                       | -9.9x10 <sup>-9</sup>  | 1x10 <sup>-8</sup>   | 0.8285 |                      | -2x10 <sup>-9</sup>    | 1.2x10 <sup>-8</sup> | 0.5650 |        |                      |                      |        |
|              | Precursor cells b lymphoid               |                        | -2.1x10 <sup>-9</sup>  | 7.7x10 <sup>-9</sup> | 0.6051               |                       | -2.6x10 <sup>-10</sup> | 9.6x10 <sup>-9</sup> | 0.5110 |                      | 1.5x10 <sup>-9</sup>   | 1.1x10 <sup>-8</sup> | 0.4434 |        |                      |                      |        |
|              | B lymphocytes                            |                        | 1.7x10 <sup>-8</sup>   | 1.1x10 <sup>-8</sup> | 0.0650               |                       | 1.4x10 <sup>-8</sup>   | 1.3x10 <sup>-8</sup> | 0.1390 |                      | 1.9x10 <sup>-8</sup>   | 1.4x10 <sup>-8</sup> | 0.0892 |        |                      |                      |        |
|              | T lymphocytes regulatory                 |                        | -6.1x10 <sup>-10</sup> | 9.8x10 <sup>-9</sup> | 0.5248               |                       | -1.1x10 <sup>-9</sup>  | 1x10 <sup>-8</sup>   | 0.5426 |                      | -4.6x10 <sup>-9</sup>  | 1.4x10 <sup>-8</sup> | 0.6243 |        |                      |                      |        |
|              | T lymphocytes                            |                        | 5.8x10 <sup>-9</sup>   | 1x10 <sup>-8</sup>   | 0.2870               |                       | 1.3x10 <sup>-8</sup>   | 1.2x10 <sup>-8</sup> | 0.1481 |                      | -1.3x10 <sup>-8</sup>  | 1x10 <sup>-8</sup>   | 0.8875 |        |                      |                      |        |
|              | Leukocytes                               |                        | 7.4x10 <sup>-9</sup>   | 1.2x10 <sup>-8</sup> | 0.2711               |                       | 1.9x10 <sup>-8</sup>   | 1.5x10 <sup>-8</sup> | 0.0995 |                      | -7.3x10 <sup>-9</sup>  | 1.4x10 <sup>-8</sup> | 0.6954 |        |                      |                      |        |
|              | Macrophages alveolar                     |                        | 3.7x10 <sup>-9</sup>   | 9.9x10 <sup>-9</sup> | 0.3526               |                       | 2.8x10 <sup>-9</sup>   | 1.1x10 <sup>-8</sup> | 0.4018 |                      | 4x10 <sup>-9</sup>     | 1.1x10 <sup>-8</sup> | 0.3593 |        |                      |                      |        |
|              | Erythroid cells                          |                        | 9.7x10 <sup>-9</sup>   | 9.3x10 <sup>-9</sup> | 0.1489               |                       | -3.6x10 <sup>-9</sup>  | 9x10 <sup>-9</sup>   | 0.6566 |                      | 2.3x10 <sup>-8</sup>   | 1.4x10 <sup>-8</sup> | 0.0461 |        |                      |                      |        |
|              | Granulocyte precursor cells              |                        | 1.4x10 <sup>-8</sup>   | 1.2x10 <sup>-8</sup> | 0.1216               |                       | 1.5x10 <sup>-8</sup>   | 1.3x10 <sup>-8</sup> | 0.1159 |                      | -2.8x10 <sup>-10</sup> | 1.7x10 <sup>-8</sup> | 0.5063 |        |                      |                      |        |
|              | Monocyte macrophage precursor cells      |                        | -1.9x10 <sup>-9</sup>  | 1.1x10 <sup>-8</sup> | 0.5672               |                       | 4.7x10 <sup>-9</sup>   | 1.2x10 <sup>-8</sup> | 0.3489 |                      | 8.6x10 <sup>-9</sup>   | 1.7x10 <sup>-8</sup> | 0.3019 |        |                      |                      |        |
|              | Myeloid progenitor cells                 |                        | 5.9x10 <sup>-9</sup>   | 1.2x10 <sup>-8</sup> | 0.3153               |                       | 6.9x10 <sup>-9</sup>   | 1.4x10 <sup>-8</sup> | 0.3101 |                      | 1.2x10 <sup>-8</sup>   | 1.7x10 <sup>-8</sup> | 0.2394 |        |                      |                      |        |
|              | Granulocyte macrophage progenitor cells  |                        | -1.2x10 <sup>-8</sup>  | 1.1x10 <sup>-8</sup> | 0.8678               |                       | -5.5x10 <sup>-9</sup>  | 1.2x10 <sup>-8</sup> | 0.6804 |                      | -3.3x10 <sup>-9</sup>  | 1.7x10 <sup>-8</sup> | 0.5753 |        |                      |                      |        |
|              | Megakaryocyte erythroid progenitor cells |                        | 7.5x10 <sup>-9</sup>   | 1.1x10 <sup>-8</sup> | 0.2558               |                       | -5.7x10 <sup>-9</sup>  | 1.2x10 <sup>-8</sup> | 0.6778 |                      | 1.6x10 <sup>-8</sup>   | 1.5x10 <sup>-8</sup> | 0.1486 |        |                      |                      |        |
|              | Hematopoietic stem cells                 |                        | 5.2x10 <sup>-9</sup>   | 1.2x10 <sup>-8</sup> | 0.3259               |                       | 4.2x10 <sup>-9</sup>   | 1.3x10 <sup>-8</sup> | 0.3727 |                      | 1.6x10 <sup>-8</sup>   | 1.6x10 <sup>-8</sup> | 0.1561 |        |                      |                      |        |
|              | Blood platelets                          |                        | -5.3x10 <sup>-9</sup>  | 8.3x10 <sup>-9</sup> | 0.7372               |                       | -3.8x10 <sup>-9</sup>  | 9.5x10 <sup>-9</sup> | 0.6550 |                      | -9x10 <sup>-9</sup>    | 1x10 <sup>-8</sup>   | 0.8053 |        |                      |                      |        |
|              | Plasma cells                             |                        | 3.5x10 <sup>-9</sup>   | 9.1x10 <sup>-9</sup> | 0.3486               |                       | 3.3x10 <sup>-9</sup>   | 1.1x10 <sup>-8</sup> | 0.3815 |                      | -1.1x10 <sup>-9</sup>  | 1.1x10 <sup>-8</sup> | 0.5386 |        |                      |                      |        |
|              | Cd4 positive t lymphocytes               |                        | -4.5x10 <sup>-9</sup>  | 9.2x10 <sup>-9</sup> | 0.6875               |                       | 3.7x10 <sup>-9</sup>   | 9.6x10 <sup>-9</sup> | 0.3486 |                      | -2x10 <sup>-8</sup>    | 1.1x10 <sup>-8</sup> | 0.9727 |        |                      |                      |        |
|              | Leukocytes mononuclear                   |                        | 1.5x10 <sup>-8</sup>   | 1.1x10 <sup>-8</sup> | 0.0891               |                       | 2.3x10 <sup>-8</sup>   | 1.4x10 <sup>-8</sup> | 0.0448 |                      | 2.6x10 <sup>-9</sup>   | 1.2x10 <sup>-8</sup> | 0.4170 |        |                      |                      |        |
|              | Blood cells                              |                        | -1.3x10 <sup>-9</sup>  | 1.2x10 <sup>-8</sup> | 0.5422               |                       | 1.8x10 <sup>-8</sup>   | 1.6x10 <sup>-8</sup> | 0.1185 |                      | -1.7x10 <sup>-8</sup>  | 1.2x10 <sup>-8</sup> | 0.9151 |        |                      |                      |        |
|              | Fetal blood                              |                        | 4.2x10 <sup>-9</sup>   | 1.2x10 <sup>-8</sup> | 0.3624               |                       | 1.1x10 <sup>-8</sup>   | 1.4x10 <sup>-8</sup> | 0.2254 |                      | 8.1x10 <sup>-9</sup>   | 1.2x10 <sup>-8</sup> | 0.2444 |        |                      |                      |        |
|              | Serum                                    |                        | 7.1x10 <sup>-9</sup>   | 9.7x10 <sup>-9</sup> | 0.2328               |                       | 1.2x10 <sup>-8</sup>   | 1.3x10 <sup>-8</sup> | 0.1652 |                      | 4.3x10 <sup>-9</sup>   | 1.2x10 <sup>-8</sup> | 0.3612 |        |                      |                      |        |
|              | Blood                                    |                        | -1.2x10 <sup>-8</sup>  | 1.1x10 <sup>-8</sup> | 0.8693               |                       | -4x10 <sup>-9</sup>    | 1.3x10 <sup>-8</sup> | 0.6179 |                      | -1.1x10 <sup>-8</sup>  | 1.4x10 <sup>-8</sup> | 0.7869 |        |                      |                      |        |
|              | Monocytes                                |                        | -4.2x10 <sup>-9</sup>  | 9.9x10 <sup>-9</sup> | 0.6643               |                       | 4.7x10 <sup>-9</sup>   | 1.3x10 <sup>-8</sup> | 0.3571 |                      | -9x10 <sup>-9</sup>    | 1.1x10 <sup>-8</sup> | 0.7862 |        |                      |                      |        |
|              | Bone marrow cells                        |                        | -4.3x10 <sup>-9</sup>  | 1.1x10 <sup>-8</sup> | 0.6527               |                       | 1.5x10 <sup>-8</sup>   | 1.3x10 <sup>-8</sup> | 0.1315 |                      | -1.6x10 <sup>-8</sup>  | 1.3x10 <sup>-8</sup> | 0.8919 |        |                      |                      |        |
|              | Neutrophils                              |                        | -2.6x10 <sup>-9</sup>  | 9.4x10 <sup>-9</sup> | 0.6080               |                       | 1.4x10 <sup>-8</sup>   | 1.1x10 <sup>-8</sup> | 0.1093 |                      | -1.1x10 <sup>-8</sup>  | 1.2x10 <sup>-8</sup> | 0.8341 |        |                      |                      |        |
|              | Killer cells natural                     |                        | -7.2x10 <sup>-9</sup>  | 1x10 <sup>-8</sup>   | 0.7568               |                       | -3x10 <sup>-9</sup>    | 1.3x10 <sup>-8</sup> | 0.5927 |                      | -2.2x10 <sup>-8</sup>  | 1.1x10 <sup>-8</sup> | 0.9758 |        |                      |                      |        |
|              | Lymphocytes null                         |                        | 6.8x10 <sup>-9</sup>   | 1x10 <sup>-8</sup>   | 0.2510               |                       | -2.2x10 <sup>-9</sup>  | 1.4x10 <sup>-8</sup> | 0.5628 |                      | 3.9x10 <sup>-9</sup>   | 1.3x10 <sup>-8</sup> | 0.3801 |        |                      |                      |        |
|              | Lymphocytes                              |                        | 1x10 <sup>-8</sup>     | 1.2x10 <sup>-8</sup> | 0.1848               |                       | 1.1x10 <sup>-8</sup>   | 1.3x10 <sup>-8</sup> | 0.2082 |                      | 5x10 <sup>-9</sup>     | 1.3x10 <sup>-8</sup> | 0.3455 |        |                      |                      |        |
|              | Spleen                                   |                        | -1.9x10 <sup>-9</sup>  | 9.2x10 <sup>-9</sup> | 0.5821               |                       | -7.3x10 <sup>-9</sup>  | 1.1x10 <sup>-8</sup> | 0.7426 |                      | 2.2x10 <sup>-9</sup>   | 1.1x10 <sup>-8</sup> | 0.4229 |        |                      |                      |        |
|              | Palatine tonsil                          |                        | 4.4x10 <sup>-10</sup>  | 9.8x10 <sup>-9</sup> | 0.4822               |                       | -6.4x10 <sup>-9</sup>  | 1.3x10 <sup>-8</sup> | 0.6918 |                      | 1.7x10 <sup>-9</sup>   | 1.3x10 <sup>-8</sup> | 0.4489 |        |                      |                      |        |
|              | Phagocytes                               |                        | 2.3x10 <sup>-9</sup>   | 1.2x10 <sup>-8</sup> | 0.4208               |                       | 1.4x10 <sup>-8</sup>   | 1.4x10 <sup>-8</sup> | 0.1457 |                      | -1x10 <sup>-8</sup>    | 1.1x10 <sup>-8</sup> | 0.8133 |        |                      |                      |        |
|              | Dendritic cells                          |                        | 3x10 <sup>-9</sup>     | 1.1x10 <sup>-8</sup> | 0.3920               |                       | 1.5x10 <sup>-8</sup>   | 1.5x10 <sup>-8</sup> | 0.1491 |                      | -1.9x10 <sup>-9</sup>  | 1.2x10 <sup>-8</sup> | 0.5624 |        |                      |                      |        |
|              | Macrophages                              |                        | -3.3x10 <sup>-9</sup>  | 1x10 <sup>-8</sup>   | 0.6258               |                       | 5.5x10 <sup>-10</sup>  | 1.1x10 <sup>-8</sup> | 0.4807 |                      | -1x10 <sup>-9</sup>    | 1.3x10 <sup>-8</sup> | 0.5333 |        |                      |                      |        |
|              | Mononuclear phagocyte system             |                        | 1.2x10 <sup>-8</sup>   | 1.3x10 <sup>-8</sup> | 0.1711               |                       | 2.2x10 <sup>-8</sup>   | 1.5x10 <sup>-8</sup> | 0.0774 |                      | -7.4x10 <sup>-10</sup> | 1.3x10 <sup>-8</sup> | 0.5225 |        |                      |                      |        |
|              | Immune system                            |                        | -7.8x10 <sup>-9</sup>  | 9.7x10 <sup>-9</sup> | 0.7889               |                       | -8.7x10 <sup>-9</sup>  | 1.2x10 <sup>-8</sup> | 0.7701 |                      | 2.1x10 <sup>-9</sup>   | 1.3x10 <sup>-8</sup> | 0.4344 |        |                      |                      |        |
|              | Cells EBV-transformed lymphocytes        |                        | 2x10 <sup>-8</sup>     | 1.1x10 <sup>-8</sup> | 0.0324               |                       | 9.4x10 <sup>-9</sup>   | 1.2x10 <sup>-8</sup> | 0.2218 |                      | 2.6x10 <sup>-8</sup>   | 1.3x10 <sup>-8</sup> | 0.0263 |        |                      |                      |        |
|              | Spleen                                   |                        | 2.1x10 <sup>-8</sup>   | 1.2x10 <sup>-8</sup> | 0.0479               |                       | 2.1x10 <sup>-8</sup>   | 1.4x10 <sup>-8</sup> | 0.0588 |                      | 2.1x10 <sup>-8</sup>   | 1.6x10 <sup>-8</sup> | 0.0892 |        |                      |                      |        |
|              | Whole blood                              |                        | -5x10 <sup>-9</sup>    | 9.7x10 <sup>-9</sup> | 0.6980               |                       | 5.8x10 <sup>-9</sup>   | 1.1x10 <sup>-8</sup> | 0.3004 |                      | -9x10 <sup>-9</sup>    | 1.1x10 <sup>-8</sup> | 0.7899 |        |                      |                      |        |
|              | Cardiovascular                           |                        | Arteries               | 0.0774               | 1.4x10 <sup>-8</sup> |                       | 9.5x10 <sup>-9</sup>   | 0.0705               | 0.0311 |                      | 1.3x10 <sup>-8</sup>   | 1x10 <sup>-8</sup>   | 0.0996 | 0.3611 | 1.7x10 <sup>-8</sup> | 1.3x10 <sup>-8</sup> | 0.1004 |
|              |                                          |                        | Umbilical veins        |                      | -1x10 <sup>-9</sup>  |                       | 8.9x10 <sup>-9</sup>   | 0.5454               |        |                      | -9.1x10 <sup>-9</sup>  | 1.2x10 <sup>-8</sup> | 0.7853 |        | 1x10 <sup>-9</sup>   | 1.3x10 <sup>-8</sup> | 0.4688 |
| Veins        |                                          | -6.3x10 <sup>-10</sup> | 9x10 <sup>-9</sup>     |                      | 0.5280               | -9.6x10 <sup>-9</sup> | 1.1x10 <sup>-8</sup>   | 0.8000               |        | 4.6x10 <sup>-9</sup> | 1.2x10 <sup>-8</sup>   | 0.3568               |        |        |                      |                      |        |

|           |                                         |        |                       |                      |        |        |                        |                      |        |        |                        |                      |        |
|-----------|-----------------------------------------|--------|-----------------------|----------------------|--------|--------|------------------------|----------------------|--------|--------|------------------------|----------------------|--------|
|           | Blood vessels                           |        | $2 \times 10^{-8}$    | $1.2 \times 10^{-8}$ | 0.0454 |        | $1.9 \times 10^{-8}$   | $1.5 \times 10^{-8}$ | 0.0940 |        | $1.1 \times 10^{-8}$   | $1.3 \times 10^{-8}$ | 0.1972 |
|           | Atrial appendage                        |        | $-2.9 \times 10^{-9}$ | $8.1 \times 10^{-9}$ | 0.6394 |        | $-1.2 \times 10^{-8}$  | $8.9 \times 10^{-9}$ | 0.9161 |        | $6.7 \times 10^{-9}$   | $1.2 \times 10^{-8}$ | 0.2837 |
|           | Heart atria                             |        | $-1.4 \times 10^{-9}$ | $8.3 \times 10^{-9}$ | 0.5652 |        | $-1.5 \times 10^{-8}$  | $9 \times 10^{-9}$   | 0.9504 |        | $1.5 \times 10^{-8}$   | $1.2 \times 10^{-8}$ | 0.1046 |
|           | Aortic valve                            |        | $2.3 \times 10^{-9}$  | $8.3 \times 10^{-9}$ | 0.3914 |        | $-4.2 \times 10^{-10}$ | $1 \times 10^{-8}$   | 0.5169 |        | $-5.6 \times 10^{-9}$  | $1.1 \times 10^{-8}$ | 0.6903 |
|           | Heart ventricles                        |        | $-1.1 \times 10^{-8}$ | $7.8 \times 10^{-9}$ | 0.9259 |        | $-1.9 \times 10^{-8}$  | $8.8 \times 10^{-9}$ | 0.9845 |        | $-1.5 \times 10^{-10}$ | $1.1 \times 10^{-8}$ | 0.5051 |
|           | Heart                                   |        | $-1.1 \times 10^{-8}$ | $7.1 \times 10^{-9}$ | 0.9451 |        | $-2.3 \times 10^{-8}$  | $8.4 \times 10^{-9}$ | 0.9966 |        | $4.2 \times 10^{-9}$   | $1.1 \times 10^{-8}$ | 0.3469 |
|           | Artery aorta                            |        | $1.9 \times 10^{-8}$  | $8.7 \times 10^{-9}$ | 0.0162 |        | $1.8 \times 10^{-8}$   | $1.1 \times 10^{-8}$ | 0.0457 |        | $1.7 \times 10^{-8}$   | $1 \times 10^{-8}$   | 0.0468 |
|           | Artery coronary                         |        | $1.2 \times 10^{-8}$  | $8.1 \times 10^{-9}$ | 0.0632 |        | $1.4 \times 10^{-8}$   | $1 \times 10^{-8}$   | 0.0825 |        | $7 \times 10^{-9}$     | $1.1 \times 10^{-8}$ | 0.2589 |
|           | Artery tibial                           |        | $2 \times 10^{-8}$    | $8.2 \times 10^{-9}$ | 0.0081 |        | $2.8 \times 10^{-8}$   | $9.9 \times 10^{-9}$ | 0.0021 |        | $1.4 \times 10^{-8}$   | $1.1 \times 10^{-8}$ | 0.1132 |
|           | Heart atrial appendage                  |        | $-6.2 \times 10^{-9}$ | $7 \times 10^{-9}$   | 0.8126 |        | $-2.2 \times 10^{-8}$  | $7.9 \times 10^{-9}$ | 0.9972 |        | $9.8 \times 10^{-9}$   | $1.1 \times 10^{-8}$ | 0.1785 |
|           | Heart left ventricle                    |        | $-2.2 \times 10^{-8}$ | $7.4 \times 10^{-9}$ | 0.9987 |        | $-3 \times 10^{-8}$    | $8.7 \times 10^{-9}$ | 0.9997 |        | $-7.8 \times 10^{-9}$  | $1.2 \times 10^{-8}$ | 0.7438 |
| CNS       | Cerebellum                              | 0.0221 | $1.5 \times 10^{-8}$  | $8.5 \times 10^{-9}$ | 0.0421 | 0.0709 | $1.2 \times 10^{-8}$   | $1.1 \times 10^{-8}$ | 0.1261 | 0.0249 | $1.2 \times 10^{-8}$   | $9.4 \times 10^{-9}$ | 0.1079 |
|           | Brain stem                              |        | $1.6 \times 10^{-8}$  | $7.8 \times 10^{-9}$ | 0.0193 |        | $1.4 \times 10^{-8}$   | $9 \times 10^{-9}$   | 0.0579 |        | $1.7 \times 10^{-8}$   | $9.9 \times 10^{-9}$ | 0.0401 |
|           | Hippocampus                             |        | $1.2 \times 10^{-8}$  | $7.6 \times 10^{-9}$ | 0.0573 |        | $1.1 \times 10^{-8}$   | $9 \times 10^{-9}$   | 0.1125 |        | $1.8 \times 10^{-8}$   | $9.6 \times 10^{-9}$ | 0.0335 |
|           | Entorhinal cortex                       |        | $1.8 \times 10^{-8}$  | $7.6 \times 10^{-9}$ | 0.0099 |        | $1.3 \times 10^{-8}$   | $9.2 \times 10^{-9}$ | 0.0845 |        | $2.8 \times 10^{-8}$   | $1 \times 10^{-8}$   | 0.0029 |
|           | Limbic system                           |        | $1.2 \times 10^{-8}$  | $7.8 \times 10^{-9}$ | 0.0632 |        | $8.5 \times 10^{-9}$   | $9.4 \times 10^{-9}$ | 0.1829 |        | $1.9 \times 10^{-8}$   | $9.8 \times 10^{-9}$ | 0.0280 |
|           | Mesencephalon                           |        | $1.1 \times 10^{-8}$  | $7.8 \times 10^{-9}$ | 0.0858 |        | $1.1 \times 10^{-8}$   | $9.2 \times 10^{-9}$ | 0.1053 |        | $1.4 \times 10^{-8}$   | $1.1 \times 10^{-8}$ | 0.0878 |
|           | Hypothalamo hypophyseal system          |        | $1.9 \times 10^{-8}$  | $1 \times 10^{-8}$   | 0.0342 |        | $2.8 \times 10^{-8}$   | $1.3 \times 10^{-8}$ | 0.0174 |        | $4 \times 10^{-9}$     | $1 \times 10^{-8}$   | 0.3525 |
|           | Hypothalamus                            |        | $1.2 \times 10^{-8}$  | $1 \times 10^{-8}$   | 0.1121 |        | $2 \times 10^{-8}$     | $1.3 \times 10^{-8}$ | 0.0574 |        | $-4.4 \times 10^{-9}$  | $1.1 \times 10^{-8}$ | 0.6587 |
|           | Diencephalon                            |        | $2.1 \times 10^{-8}$  | $8.8 \times 10^{-9}$ | 0.0086 |        | $2.5 \times 10^{-8}$   | $1.1 \times 10^{-8}$ | 0.0090 |        | $9.7 \times 10^{-9}$   | $1.2 \times 10^{-8}$ | 0.2038 |
|           | Corpus striatum                         |        | $1.9 \times 10^{-8}$  | $8.5 \times 10^{-9}$ | 0.0125 |        | $9.8 \times 10^{-9}$   | $9.9 \times 10^{-9}$ | 0.1604 |        | $3 \times 10^{-8}$     | $1.4 \times 10^{-8}$ | 0.0142 |
|           | Basal ganglia                           |        | $1.5 \times 10^{-8}$  | $8 \times 10^{-9}$   | 0.0278 |        | $4.5 \times 10^{-9}$   | $8.7 \times 10^{-9}$ | 0.3022 |        | $3 \times 10^{-8}$     | $1.3 \times 10^{-8}$ | 0.0138 |
|           | Frontal lobe                            |        | $2.4 \times 10^{-9}$  | $6.8 \times 10^{-9}$ | 0.3643 |        | $7.5 \times 10^{-9}$   | $7.8 \times 10^{-9}$ | 0.1662 |        | $-5.6 \times 10^{-9}$  | $9.3 \times 10^{-9}$ | 0.7275 |
|           | Visual cortex                           |        | $1.3 \times 10^{-8}$  | $7.4 \times 10^{-9}$ | 0.0455 |        | $8.6 \times 10^{-9}$   | $8.7 \times 10^{-9}$ | 0.1616 |        | $1.7 \times 10^{-8}$   | $1.1 \times 10^{-8}$ | 0.0587 |
|           | Parietal lobe                           |        | $1.9 \times 10^{-8}$  | $7.5 \times 10^{-9}$ | 0.0062 |        | $2.1 \times 10^{-8}$   | $8.5 \times 10^{-9}$ | 0.0075 |        | $1.9 \times 10^{-8}$   | $1.1 \times 10^{-8}$ | 0.0383 |
|           | Cerebral cortex                         |        | $1.1 \times 10^{-8}$  | $7.1 \times 10^{-9}$ | 0.0621 |        | $5.8 \times 10^{-9}$   | $8.1 \times 10^{-9}$ | 0.2386 |        | $2 \times 10^{-8}$     | $9.7 \times 10^{-9}$ | 0.0208 |
|           | Metencephalon                           |        | $1.3 \times 10^{-8}$  | $8.7 \times 10^{-9}$ | 0.0660 |        | $1.2 \times 10^{-8}$   | $1.1 \times 10^{-8}$ | 0.1355 |        | $9.2 \times 10^{-9}$   | $9.4 \times 10^{-9}$ | 0.1641 |
|           | Brain                                   |        | $1.4 \times 10^{-8}$  | $6.6 \times 10^{-9}$ | 0.0153 |        | $1.1 \times 10^{-8}$   | $7.7 \times 10^{-9}$ | 0.0782 |        | $2.2 \times 10^{-8}$   | $9.6 \times 10^{-9}$ | 0.0094 |
|           | Retina                                  |        | $5.9 \times 10^{-9}$  | $7.9 \times 10^{-9}$ | 0.2275 |        | $3 \times 10^{-9}$     | $8.4 \times 10^{-9}$ | 0.3590 |        | $1.2 \times 10^{-8}$   | $1.1 \times 10^{-8}$ | 0.1393 |
|           | Neural stem cells                       |        | $9 \times 10^{-9}$    | $9.6 \times 10^{-9}$ | 0.1744 |        | $1.1 \times 10^{-8}$   | $1.1 \times 10^{-8}$ | 0.1573 |        | $9.4 \times 10^{-9}$   | $1.2 \times 10^{-8}$ | 0.2244 |
|           | Brain amygdala                          |        | $8 \times 10^{-9}$    | $6.5 \times 10^{-9}$ | 0.1106 |        | $1.1 \times 10^{-8}$   | $7.7 \times 10^{-9}$ | 0.0746 |        | $1.1 \times 10^{-8}$   | $7.8 \times 10^{-9}$ | 0.0750 |
|           | Brain Anterior cingulate cortex (BA24)  |        | $8.7 \times 10^{-9}$  | $6.4 \times 10^{-9}$ | 0.0875 |        | $9.7 \times 10^{-9}$   | $7.4 \times 10^{-9}$ | 0.0944 |        | $1.1 \times 10^{-8}$   | $8.1 \times 10^{-9}$ | 0.0915 |
|           | Brain Caudate (basal ganglia)           |        | $1.5 \times 10^{-8}$  | $6.9 \times 10^{-9}$ | 0.0147 |        | $1.8 \times 10^{-8}$   | $8.8 \times 10^{-9}$ | 0.0184 |        | $9.2 \times 10^{-9}$   | $7.8 \times 10^{-9}$ | 0.1192 |
|           | Brain cerebellar hemisphere             |        | $3 \times 10^{-9}$    | $7.5 \times 10^{-9}$ | 0.3463 |        | $3.2 \times 10^{-9}$   | $9 \times 10^{-9}$   | 0.3628 |        | $2.4 \times 10^{-9}$   | $7.4 \times 10^{-9}$ | 0.3726 |
|           | Brain cerebellum                        |        | $2.4 \times 10^{-9}$  | $7.1 \times 10^{-9}$ | 0.3687 |        | $-1.7 \times 10^{-9}$  | $8.5 \times 10^{-9}$ | 0.5780 |        | $6 \times 10^{-9}$     | $7.6 \times 10^{-9}$ | 0.2154 |
|           | Brain cortex                            |        | $8.2 \times 10^{-9}$  | $6.8 \times 10^{-9}$ | 0.1132 |        | $1.3 \times 10^{-8}$   | $8 \times 10^{-9}$   | 0.0478 |        | $8.1 \times 10^{-9}$   | $8.1 \times 10^{-9}$ | 0.1578 |
|           | Brain frontal cortex (ba9)              |        | $8.9 \times 10^{-9}$  | $6.7 \times 10^{-9}$ | 0.0914 |        | $1.1 \times 10^{-8}$   | $8 \times 10^{-9}$   | 0.0854 |        | $9.1 \times 10^{-9}$   | $7.8 \times 10^{-9}$ | 0.1217 |
|           | Brain hippocampus                       |        | $6.9 \times 10^{-9}$  | $6.4 \times 10^{-9}$ | 0.1400 |        | $8.6 \times 10^{-9}$   | $7.8 \times 10^{-9}$ | 0.1353 |        | $9.8 \times 10^{-9}$   | $7.7 \times 10^{-9}$ | 0.1024 |
|           | Brain hypothalamus                      |        | $1.2 \times 10^{-8}$  | $6.1 \times 10^{-9}$ | 0.0210 |        | $8.6 \times 10^{-9}$   | $7.4 \times 10^{-9}$ | 0.1224 |        | $1.9 \times 10^{-8}$   | $7.6 \times 10^{-9}$ | 0.0061 |
|           | Brain Nucleus accumbens (basal ganglia) |        | $9 \times 10^{-9}$    | $6.7 \times 10^{-9}$ | 0.0897 |        | $1.2 \times 10^{-8}$   | $8.6 \times 10^{-9}$ | 0.0895 |        | $4.5 \times 10^{-9}$   | $8 \times 10^{-9}$   | 0.2844 |
|           | Brain Putamen (basal ganglia)           |        | $1.1 \times 10^{-8}$  | $6.6 \times 10^{-9}$ | 0.0414 |        | $1.2 \times 10^{-8}$   | $8.3 \times 10^{-9}$ | 0.0715 |        | $9.2 \times 10^{-9}$   | $7.8 \times 10^{-9}$ | 0.1184 |
|           | Brain Spinal cord (cervical c-1)        |        | $1.4 \times 10^{-8}$  | $6.2 \times 10^{-9}$ | 0.0143 |        | $3.6 \times 10^{-9}$   | $7.4 \times 10^{-9}$ | 0.3126 |        | $2.2 \times 10^{-8}$   | $8.3 \times 10^{-9}$ | 0.0039 |
|           | Brain Substantia nigra                  |        | $2 \times 10^{-8}$    | $6.7 \times 10^{-9}$ | 0.0016 |        | $1.6 \times 10^{-8}$   | $7.8 \times 10^{-9}$ | 0.0214 |        | $2.3 \times 10^{-8}$   | $8.9 \times 10^{-9}$ | 0.0053 |
| Digestive | A03 556 124 369 intestinal mucosa       | 0.4426 | $1.5 \times 10^{-8}$  | $1 \times 10^{-8}$   | 0.0766 | 0.5070 | $1.3 \times 10^{-8}$   | $1.1 \times 10^{-8}$ | 0.1133 | 0.5851 | $1.8 \times 10^{-8}$   | $1.3 \times 10^{-8}$ | 0.0716 |
|           | A03 556 124 526 767 rectum              |        | $-1 \times 10^{-8}$   | $1 \times 10^{-8}$   | 0.8441 |        | $-1.4 \times 10^{-8}$  | $1.2 \times 10^{-8}$ | 0.8809 |        | $-1.9 \times 10^{-8}$  | $1.1 \times 10^{-8}$ | 0.9526 |
|           | A03 556 124 684 intestine small         |        | $-1.1 \times 10^{-9}$ | $1.1 \times 10^{-8}$ | 0.5391 |        | $-8 \times 10^{-9}$    | $1.3 \times 10^{-8}$ | 0.7269 |        | $1 \times 10^{-8}$     | $1.8 \times 10^{-8}$ | 0.2821 |
|           | A03 556 124 intestines                  |        | $-8.8 \times 10^{-9}$ | $1 \times 10^{-8}$   | 0.8061 |        | $-7.6 \times 10^{-9}$  | $1.3 \times 10^{-8}$ | 0.7240 |        | $-1.5 \times 10^{-8}$  | $1.2 \times 10^{-8}$ | 0.8873 |
|           | A03 556 249 124 ileum                   |        | $2 \times 10^{-8}$    | $1.3 \times 10^{-8}$ | 0.0683 |        | $1.8 \times 10^{-8}$   | $1.6 \times 10^{-8}$ | 0.1301 |        | $2.2 \times 10^{-8}$   | $2 \times 10^{-8}$   | 0.1404 |
|           | A03 556 249 249 209 cecum               |        | $-1.1 \times 10^{-8}$ | $8.8 \times 10^{-9}$ | 0.8901 |        | $-8.8 \times 10^{-9}$  | $1 \times 10^{-8}$   | 0.8010 |        | $-1.9 \times 10^{-8}$  | $1.1 \times 10^{-8}$ | 0.9610 |
|           | A03 556 249 249 356 668 colon sigmoid   |        | $8.2 \times 10^{-9}$  | $9.2 \times 10^{-9}$ | 0.1842 |        | $3.5 \times 10^{-9}$   | $1.2 \times 10^{-8}$ | 0.3835 |        | $-4.5 \times 10^{-10}$ | $1.1 \times 10^{-8}$ | 0.5159 |
|           | A03 556 249 249 356 colon               |        | $-1.3 \times 10^{-8}$ | $1 \times 10^{-8}$   | 0.8910 |        | $-7.3 \times 10^{-9}$  | $1.3 \times 10^{-8}$ | 0.7122 |        | $-2.6 \times 10^{-8}$  | $1.2 \times 10^{-8}$ | 0.9878 |
|           | A03 556 500 760 464 parotid gland       |        | $1.7 \times 10^{-8}$  | $1.1 \times 10^{-8}$ | 0.0720 |        | $1.7 \times 10^{-8}$   | $1.3 \times 10^{-8}$ | 0.0974 |        | $2.2 \times 10^{-8}$   | $1.4 \times 10^{-8}$ | 0.0593 |

|                            |                                          |        |                                  |                      |        |        |                                  |                      |        |        |                        |                      |        |
|----------------------------|------------------------------------------|--------|----------------------------------|----------------------|--------|--------|----------------------------------|----------------------|--------|--------|------------------------|----------------------|--------|
|                            | A03 556 500 760 salivary glands          |        | 1.3x10 <sup>-8</sup>             | 1.2x10 <sup>-8</sup> | 0.1335 |        | 1.8x10 <sup>-8</sup>             | 1.4x10 <sup>-8</sup> | 0.0909 |        | 8.6x10 <sup>-9</sup>   | 1.6x10 <sup>-8</sup> | 0.2942 |
|                            | A03 556 875 500 esophagus                |        | 6.7x10 <sup>-9</sup>             | 8.7x10 <sup>-9</sup> | 0.2191 |        | 1.1x10 <sup>-8</sup>             | 1.1x10 <sup>-8</sup> | 0.1570 |        | -9x10 <sup>-9</sup>    | 1x10 <sup>-8</sup>   | 0.8103 |
|                            | A03 556 875 875 stomach                  |        | 3.6x10 <sup>-9</sup>             | 1.1x10 <sup>-8</sup> | 0.3684 |        | 6.1x10 <sup>-9</sup>             | 1.3x10 <sup>-8</sup> | 0.3226 |        | -2.8x10 <sup>-11</sup> | 1.6x10 <sup>-8</sup> | 0.5007 |
|                            | A03 556 875 upper gastrointestinal tract |        | -2.7x10 <sup>-9</sup>            | 1.1x10 <sup>-8</sup> | 0.6022 |        | 3.9x10 <sup>-9</sup>             | 1.3x10 <sup>-8</sup> | 0.3819 |        | -7.7x10 <sup>-9</sup>  | 1.3x10 <sup>-8</sup> | 0.7176 |
|                            | A03 556 gastrointestinal tract           |        | -2.1x10 <sup>-9</sup>            | 1.1x10 <sup>-8</sup> | 0.5775 |        | 8.8x10 <sup>-9</sup>             | 1.3x10 <sup>-8</sup> | 0.2462 |        | -1.1x10 <sup>-8</sup>  | 1.3x10 <sup>-8</sup> | 0.8165 |
|                            | Colon sigmoid                            |        | 6.1x10 <sup>-9</sup>             | 8.7x10 <sup>-9</sup> | 0.2417 |        | 8.7x10 <sup>-9</sup>             | 1x10 <sup>-8</sup>   | 0.1949 |        | -3.7x10 <sup>-9</sup>  | 1.1x10 <sup>-8</sup> | 0.6272 |
|                            | Colon transverse                         |        | 8.9x10 <sup>-9</sup>             | 9.9x10 <sup>-9</sup> | 0.1843 |        | 9.8x10 <sup>-9</sup>             | 1.1x10 <sup>-8</sup> | 0.1929 |        | 8.8x10 <sup>-9</sup>   | 1.3x10 <sup>-8</sup> | 0.2452 |
|                            | Esophagus gastroesophageal junction      |        | 6.1x10 <sup>-9</sup>             | 8.7x10 <sup>-9</sup> | 0.2431 |        | 1.1x10 <sup>-8</sup>             | 1.1x10 <sup>-8</sup> | 0.1552 |        | -5.7x10 <sup>-10</sup> | 1x10 <sup>-8</sup>   | 0.5227 |
|                            | Esophagus mucosa                         |        | 1.4x10 <sup>-8</sup>             | 8.9x10 <sup>-9</sup> | 0.0519 |        | 1.4x10 <sup>-8</sup>             | 9.9x10 <sup>-9</sup> | 0.0732 |        | 1.9x10 <sup>-8</sup>   | 1.2x10 <sup>-8</sup> | 0.0604 |
|                            | Esophagus muscularis                     |        | 2.6x10 <sup>-9</sup>             | 8.4x10 <sup>-9</sup> | 0.3765 |        | 6x10 <sup>-9</sup>               | 1.1x10 <sup>-8</sup> | 0.2835 |        | -1.5x10 <sup>-9</sup>  | 9.3x10 <sup>-9</sup> | 0.5639 |
|                            | Small intestine terminal ileum           |        | -4.1x10 <sup>-9</sup>            | 1.2x10 <sup>-8</sup> | 0.6361 |        | -1.3x10 <sup>-8</sup>            | 1.5x10 <sup>-8</sup> | 0.8123 |        | 7.6x10 <sup>-9</sup>   | 1.5x10 <sup>-8</sup> | 0.3025 |
|                            | Stomach                                  |        | 1.9x10 <sup>-9</sup>             | 8.3x10 <sup>-9</sup> | 0.4114 |        | -5.5x10 <sup>-10</sup>           | 9.8x10 <sup>-9</sup> | 0.5222 |        | 3.1x10 <sup>-9</sup>   | 1x10 <sup>-8</sup>   | 0.3796 |
| Endocrine                  | Adrenal cortex                           | 0.8625 | -2x10 <sup>-9</sup>              | 9.7x10 <sup>-9</sup> | 0.5831 | 0.8102 | 8.5x10 <sup>-10</sup>            | 1.3x10 <sup>-8</sup> | 0.4733 | 0.9178 | -9.1x10 <sup>-9</sup>  | 1.1x10 <sup>-8</sup> | 0.7950 |
|                            | Adrenal glands                           |        | -6.4x10 <sup>-9</sup>            | 9.1x10 <sup>-9</sup> | 0.7611 |        | -5.6x10 <sup>-9</sup>            | 1.2x10 <sup>-8</sup> | 0.6759 |        | -1.1x10 <sup>-8</sup>  | 1x10 <sup>-8</sup>   | 0.8566 |
|                            | Thyroid gland                            |        | -3.3x10 <sup>-9</sup>            | 8.4x10 <sup>-9</sup> | 0.6508 |        | -5.6x10 <sup>-9</sup>            | 1x10 <sup>-8</sup>   | 0.7108 |        | -4.8x10 <sup>-9</sup>  | 1x10 <sup>-8</sup>   | 0.6794 |
|                            | Endocrine glands                         |        | 2.1x10 <sup>-10</sup>            | 8.5x10 <sup>-9</sup> | 0.4903 |        | -7.4x10 <sup>-9</sup>            | 1x10 <sup>-8</sup>   | 0.7666 |        | -4.1x10 <sup>-9</sup>  | 1.1x10 <sup>-8</sup> | 0.6394 |
|                            | Endocrine cells                          |        | <sup>-9</sup> 2x10 <sup>-9</sup> | 8.1x10 <sup>-9</sup> | 0.8718 |        | -8.5x10 <sup>-9</sup>            | 1.1x10 <sup>-8</sup> | 0.7873 |        | -1.8x10 <sup>-8</sup>  | 9.5x10 <sup>-9</sup> | 0.9735 |
|                            | Adrenal gland                            |        | -8.8x10 <sup>-9</sup>            | 9.6x10 <sup>-9</sup> | 0.8220 |        | 3.9x10 <sup>-9</sup>             | 1.2x10 <sup>-8</sup> | 0.3705 |        | -2x10 <sup>-8</sup>    | 1.1x10 <sup>-8</sup> | 0.9662 |
|                            | Pituitary                                |        | 6.8x10 <sup>-11</sup>            | 8.4x10 <sup>-9</sup> | 0.4968 |        | 4.2x10 <sup>-9</sup>             | 1x10 <sup>-8</sup>   | 0.3420 |        | -4.1x10 <sup>-9</sup>  | 9.1x10 <sup>-9</sup> | 0.6729 |
|                            | Thyroid                                  |        | 1.1x10 <sup>-9</sup>             | 8x10 <sup>-9</sup>   | 0.4434 |        | 2.4x10 <sup>-9</sup>             | 9.6x10 <sup>-9</sup> | 0.4005 |        | -9.4x10 <sup>-9</sup>  | 1.1x10 <sup>-8</sup> | 0.8115 |
| Liver                      | Liver                                    | 0.3935 | 8.9x10 <sup>-9</sup>             | 9.3x10 <sup>-9</sup> | 0.1679 | 0.3987 | 1x10 <sup>-8</sup>               | 1.1x10 <sup>-8</sup> | 0.1694 | 0.2907 | 6.9x10 <sup>-9</sup>   | 1.1x10 <sup>-8</sup> | 0.2709 |
|                            | Hepatocytes                              |        | 7.5x10 <sup>-9</sup>             | 1.2x10 <sup>-8</sup> | 0.2598 |        | 1x10 <sup>-8</sup>               | 1.4x10 <sup>-8</sup> | 0.2381 |        | 1.4x10 <sup>-9</sup>   | 1.3x10 <sup>-8</sup> | 0.4574 |
|                            | Liver                                    |        | -1.8x10 <sup>-9</sup>            | 7.8x10 <sup>-9</sup> | 0.5908 |        | -7.9x10 <sup>-9</sup>            | 9x10 <sup>-9</sup>   | 0.8108 |        | 1.3x10 <sup>-8</sup>   | 1x10 <sup>-8</sup>   | 0.1028 |
| Musculoskeletal/Connective | Cartilage                                | 0.0982 | 6.2x10 <sup>-10</sup>            | 1.1x10 <sup>-8</sup> | 0.4767 | 0.1370 | 5.3x10 <sup>-9</sup>             | 1.3x10 <sup>-8</sup> | 0.3359 | 0.2911 | 7.3x10 <sup>-9</sup>   | 1.4x10 <sup>-8</sup> | 0.2961 |
|                            | Quadriceps muscle                        |        | 6.6x10 <sup>-9</sup>             | 9.7x10 <sup>-9</sup> | 0.2484 |        | 9.3x10 <sup>-9</sup>             | 1.2x10 <sup>-8</sup> | 0.2217 |        | 1.3x10 <sup>-9</sup>   | 1.2x10 <sup>-8</sup> | 0.4561 |
|                            | Cervical vertebrae                       |        | 3.6x10 <sup>-9</sup>             | 9.1x10 <sup>-9</sup> | 0.3454 |        | 5.4x10 <sup>-9</sup>             | 1.2x10 <sup>-8</sup> | 0.3310 |        | 6.1x10 <sup>-10</sup>  | 1x10 <sup>-8</sup>   | 0.4767 |
|                            | Synovial membrane                        |        | -6.2x10 <sup>-9</sup>            | 9.3x10 <sup>-9</sup> | 0.7478 |        | 3.3x10 <sup>-9</sup>             | 1.1x10 <sup>-8</sup> | 0.3860 |        | -7x10 <sup>-9</sup>    | 1x10 <sup>-8</sup>   | 0.7539 |
|                            | Myometrium                               |        | 5.2x10 <sup>-9</sup>             | 8.7x10 <sup>-9</sup> | 0.2769 |        | -3.2x10 <sup>-9</sup>            | 1x10 <sup>-8</sup>   | 0.6195 |        | 2.1x10 <sup>-9</sup>   | 1.2x10 <sup>-8</sup> | 0.4274 |
|                            | Keloid                                   |        | 5.9x10 <sup>-9</sup>             | 9.2x10 <sup>-9</sup> | 0.2623 |        | 9x10 <sup>-9</sup>               | 1.1x10 <sup>-8</sup> | 0.2168 |        | -2.5x10 <sup>-9</sup>  | 1x10 <sup>-8</sup>   | 0.5941 |
|                            | A10 165 450 300 cicatrix                 |        | 8.6x10 <sup>-9</sup>             | 9.3x10 <sup>-9</sup> | 0.1775 |        | 1.4x10 <sup>-8</sup>             | 1.1x10 <sup>-8</sup> | 0.1012 |        | -2.1x10 <sup>-9</sup>  | 1x10 <sup>-8</sup>   | 0.5798 |
|                            | A10 690 467 muscle smooth                |        | 1.9x10 <sup>-8</sup>             | 1x10 <sup>-8</sup>   | 0.0335 |        | 2.3x10 <sup>-8</sup>             | 1.2x10 <sup>-8</sup> | 0.0312 |        | 1.5x10 <sup>-8</sup>   | 1.3x10 <sup>-8</sup> | 0.1194 |
|                            | A10 690 muscles                          |        | 7.5x10 <sup>-9</sup>             | 1x10 <sup>-8</sup>   | 0.2286 |        | 1.1x10 <sup>-8</sup>             | 1.2x10 <sup>-8</sup> | 0.1748 |        | 1.3x10 <sup>-9</sup>   | 1.2x10 <sup>-8</sup> | 0.4577 |
|                            | A11 329 171 chondrocytes                 |        | 1.9x10 <sup>-8</sup>             | 1x10 <sup>-8</sup>   | 0.0363 |        | 2.7x10 <sup>-8</sup>             | 1.3x10 <sup>-8</sup> | 0.0207 |        | 5.6x10 <sup>-9</sup>   | 1.1x10 <sup>-8</sup> | 0.3097 |
|                            | A11 329 228 fibroblasts                  |        | 1x10 <sup>-8</sup>               | 8.4x10 <sup>-9</sup> | 0.1126 |        | 3.3x10 <sup>-9</sup>             | 9.6x10 <sup>-9</sup> | 0.3659 |        | 1.8x10 <sup>-8</sup>   | 1.2x10 <sup>-8</sup> | 0.0565 |
|                            | A11 329 629 osteoblasts                  |        | 9.7x10 <sup>-9</sup>             | 9.1x10 <sup>-9</sup> | 0.1427 |        | 8.2x10 <sup>-9</sup>             | 1.1x10 <sup>-8</sup> | 0.2189 |        | 1.2x10 <sup>-8</sup>   | 1.1x10 <sup>-8</sup> | 0.1471 |
|                            | A11 329 830 stromal cells                |        | 2.3x10 <sup>-8</sup>             | 1.1x10 <sup>-8</sup> | 0.0178 |        | 1.8x10 <sup>-8</sup>             | 1.3x10 <sup>-8</sup> | 0.0745 |        | 2.5x10 <sup>-8</sup>   | 1.2x10 <sup>-8</sup> | 0.0194 |
|                            | A11 329 connective tissue cells          |        | 9.7x10 <sup>-9</sup>             | 9.1x10 <sup>-9</sup> | 0.1426 |        | 9.4x10 <sup>-9</sup>             | 1.1x10 <sup>-8</sup> | 0.2007 |        | 7.4x10 <sup>-9</sup>   | 1.3x10 <sup>-8</sup> | 0.2837 |
|                            | A11 620 520 myocytes smooth muscle       |        | 1x10 <sup>-8</sup>               | 1x10 <sup>-8</sup>   | 0.1604 |        | 2.2x10 <sup>-8</sup>             | 1.2x10 <sup>-8</sup> | 0.0359 |        | 2.2x10 <sup>-9</sup>   | 1.1x10 <sup>-8</sup> | 0.4232 |
|                            | Cells Transformed fibroblasts            |        | 2.3x10 <sup>-8</sup>             | 1x10 <sup>-8</sup>   | 0.0118 |        | 2.2x10 <sup>-8</sup>             | 1.2x10 <sup>-8</sup> | 0.0341 |        | 1.2x10 <sup>-8</sup>   | 1.2x10 <sup>-8</sup> | 0.1610 |
|                            | Muscle skeletal                          |        | -5.8x10 <sup>-9</sup>            | 9x10 <sup>-9</sup>   | 0.7392 |        | 3.4x10 <sup>-9</sup>             | 1.1x10 <sup>-8</sup> | 0.3797 |        | -1.2x10 <sup>-8</sup>  | 1.1x10 <sup>-8</sup> | 0.8560 |
| Other                      | Lung                                     | 0.3051 | -8.4x10 <sup>-10</sup>           | 9.8x10 <sup>-9</sup> | 0.5343 | 0.1801 | 1.1x10 <sup>-8</sup>             | 1.3x10 <sup>-8</sup> | 0.2040 | 0.9373 | -1.2x10 <sup>-8</sup>  | 1.2x10 <sup>-8</sup> | 0.8519 |
|                            | Nasal mucosa                             |        | -1.6x10 <sup>-8</sup>            | 8.4x10 <sup>-9</sup> | 0.9712 |        | <sup>-9</sup> 6x10 <sup>-9</sup> | 1x10 <sup>-8</sup>   | 0.8251 |        | -1.9x10 <sup>-8</sup>  | 9.9x10 <sup>-9</sup> | 0.9740 |
|                            | Kidney cortex                            |        | 6.8x10 <sup>-9</sup>             | 8.5x10 <sup>-9</sup> | 0.2126 |        | -1.5x10 <sup>-9</sup>            | 1x10 <sup>-8</sup>   | 0.5588 |        | 6.2x10 <sup>-9</sup>   | 1.2x10 <sup>-8</sup> | 0.3026 |
|                            | Kidney                                   |        | 8.8x10 <sup>-9</sup>             | 8.5x10 <sup>-9</sup> | 0.1507 |        | -3.4x10 <sup>-10</sup>           | 9.7x10 <sup>-9</sup> | 0.5139 |        | 2.6x10 <sup>-9</sup>   | 1.1x10 <sup>-8</sup> | 0.4031 |
|                            | Urinary bladder                          |        | 6.2x10 <sup>-9</sup>             | 1.4x10 <sup>-8</sup> | 0.3286 |        | 1.7x10 <sup>-8</sup>             | 1.8x10 <sup>-8</sup> | 0.1747 |        | -4.7x10 <sup>-9</sup>  | 1.2x10 <sup>-8</sup> | 0.6540 |
|                            | Eye                                      |        | 4.8x10 <sup>-9</sup>             | 8.5x10 <sup>-9</sup> | 0.2872 |        | 8.7x10 <sup>-9</sup>             | 9.6x10 <sup>-9</sup> | 0.1825 |        | -1.6x10 <sup>-8</sup>  | 1.1x10 <sup>-8</sup> | 0.9244 |
|                            | Epidermis                                |        | 5.3x10 <sup>-9</sup>             | 9.1x10 <sup>-9</sup> | 0.2809 |        | 5.2x10 <sup>-9</sup>             | 1.1x10 <sup>-8</sup> | 0.3158 |        | -1.1x10 <sup>-9</sup>  | 1x10 <sup>-8</sup>   | 0.5401 |
|                            | Epithelium                               |        | -7.1x10 <sup>-9</sup>            | 8.9x10 <sup>-9</sup> | 0.7899 |        | -4.5x10 <sup>-9</sup>            | 1x10 <sup>-8</sup>   | 0.6689 |        | -1.6x10 <sup>-8</sup>  | 1.1x10 <sup>-8</sup> | 0.9393 |
|                            | Chorion                                  |        | 6.3x10 <sup>-9</sup>             | 8.8x10 <sup>-9</sup> | 0.2382 |        | 6.5x10 <sup>-9</sup>             | 1.2x10 <sup>-8</sup> | 0.2926 |        | -9.4x10 <sup>-9</sup>  | 1x10 <sup>-8</sup>   | 0.8160 |
|                            | Mouth mucosa                             |        | 1.3x10 <sup>-9</sup>             | 9.5x10 <sup>-9</sup> | 0.4450 |        | 8.5x10 <sup>-9</sup>             | 1x10 <sup>-8</sup>   | 0.2088 |        | -9.4x10 <sup>-9</sup>  | 1.2x10 <sup>-8</sup> | 0.7872 |
|                            | Mucous membrane                          |        | -3.3x10 <sup>-9</sup>            | 9.8x10 <sup>-9</sup> | 0.6304 |        | 2.9x10 <sup>-9</sup>             | 1.2x10 <sup>-8</sup> | 0.4053 |        | -1.2x10 <sup>-8</sup>  | 1.2x10 <sup>-8</sup> | 0.8527 |
|                            | Serous membrane                          |        | 4.2x10 <sup>-9</sup>             | 1.1x10 <sup>-8</sup> | 0.3467 |        | 1.1x10 <sup>-9</sup>             | 1.3x10 <sup>-8</sup> | 0.4664 |        | 1.2x10 <sup>-8</sup>   | 1.1x10 <sup>-8</sup> | 0.1298 |

|                     |                                   |        |                        |                      |        |        |                       |                      |        |        |                       |                      |        |
|---------------------|-----------------------------------|--------|------------------------|----------------------|--------|--------|-----------------------|----------------------|--------|--------|-----------------------|----------------------|--------|
|                     | Membranes                         |        | -2.8x10 <sup>-10</sup> | 8.9x10 <sup>-9</sup> | 0.5124 |        | 1.8x10 <sup>-12</sup> | 1.1x10 <sup>-8</sup> | 0.4999 |        | 1.1x10 <sup>-9</sup>  | 1.2x10 <sup>-8</sup> | 0.4630 |
|                     | Endothelial cells                 |        | 9.3x10 <sup>-9</sup>   | 1x10 <sup>-8</sup>   | 0.1851 |        | 8.6x10 <sup>-9</sup>  | 1.2x10 <sup>-8</sup> | 0.2448 |        | 4.7x10 <sup>-9</sup>  | 1.3x10 <sup>-8</sup> | 0.3547 |
|                     | Glucagon secreting cells          |        | 2.7x10 <sup>-8</sup>   | 1.2x10 <sup>-8</sup> | 0.0132 |        | 2.1x10 <sup>-8</sup>  | 1.4x10 <sup>-8</sup> | 0.0695 |        | 2.2x10 <sup>-8</sup>  | 1.4x10 <sup>-8</sup> | 0.0577 |
|                     | Granulosa cells                   |        | -1.3x10 <sup>-8</sup>  | 7.4x10 <sup>-9</sup> | 0.9561 |        | -3.9x10 <sup>-9</sup> | 8.8x10 <sup>-9</sup> | 0.6729 |        | -2x10 <sup>-8</sup>   | 1x10 <sup>-8</sup>   | 0.9791 |
|                     | Keratinocytes                     |        | 2.4x10 <sup>-8</sup>   | 1.2x10 <sup>-8</sup> | 0.0198 |        | 3x10 <sup>-8</sup>    | 1.3x10 <sup>-8</sup> | 0.0129 |        | 1.3x10 <sup>-8</sup>  | 1.3x10 <sup>-8</sup> | 0.1436 |
|                     | Epithelial cells                  |        | -1.4x10 <sup>-9</sup>  | 9.4x10 <sup>-9</sup> | 0.5593 |        | -7.6x10 <sup>-9</sup> | 1.2x10 <sup>-8</sup> | 0.7442 |        | 4.3x10 <sup>-9</sup>  | 1.1x10 <sup>-8</sup> | 0.3423 |
|                     | Adult stem cells                  |        | 1.3x10 <sup>-8</sup>   | 1.1x10 <sup>-8</sup> | 0.1267 |        | 1.9x10 <sup>-9</sup>  | 1.3x10 <sup>-8</sup> | 0.4439 |        | 4.5x10 <sup>-9</sup>  | 1.2x10 <sup>-8</sup> | 0.3592 |
|                     | Embryoid bodies                   |        | 8.9x10 <sup>-9</sup>   | 9.1x10 <sup>-9</sup> | 0.1633 |        | 5.1x10 <sup>-9</sup>  | 1.1x10 <sup>-8</sup> | 0.3164 |        | 2.9x10 <sup>-9</sup>  | 1.2x10 <sup>-8</sup> | 0.4037 |
|                     | Embryonic stem cells              |        | 6.3x10 <sup>-9</sup>   | 8.4x10 <sup>-9</sup> | 0.2257 |        | -3.8x10 <sup>-9</sup> | 1.1x10 <sup>-8</sup> | 0.6402 |        | 5.2x10 <sup>-10</sup> | 1.1x10 <sup>-8</sup> | 0.4808 |
|                     | Mesenchymal stem cells            |        | 9.5x10 <sup>-9</sup>   | 8.8x10 <sup>-9</sup> | 0.1391 |        | 8.5x10 <sup>-9</sup>  | 1x10 <sup>-8</sup>   | 0.2087 |        | 7.4x10 <sup>-9</sup>  | 1.1x10 <sup>-8</sup> | 0.2415 |
|                     | Induced pluripotent stem cells    |        | 9.6x10 <sup>-9</sup>   | 9.6x10 <sup>-9</sup> | 0.1604 |        | -2.7x10 <sup>-9</sup> | 1.2x10 <sup>-8</sup> | 0.5901 |        | 3.9x10 <sup>-10</sup> | 1.2x10 <sup>-8</sup> | 0.4874 |
|                     | Stem cells                        |        | 1.2x10 <sup>-8</sup>   | 1.2x10 <sup>-8</sup> | 0.1479 |        | 4.9x10 <sup>-9</sup>  | 1.4x10 <sup>-8</sup> | 0.3571 |        | 8.5x10 <sup>-9</sup>  | 1.7x10 <sup>-8</sup> | 0.3031 |
|                     | Periodontium                      |        | 1.2x10 <sup>-8</sup>   | 1.2x10 <sup>-8</sup> | 0.1565 |        | 2.9x10 <sup>-8</sup>  | 1.4x10 <sup>-8</sup> | 0.0238 |        | -2.9x10 <sup>-9</sup> | 1.3x10 <sup>-8</sup> | 0.5858 |
|                     | Dentition                         |        | 7.1x10 <sup>-9</sup>   | 1x10 <sup>-8</sup>   | 0.2433 |        | 7.1x10 <sup>-9</sup>  | 1.1x10 <sup>-8</sup> | 0.2541 |        | 5.7x10 <sup>-9</sup>  | 1.2x10 <sup>-8</sup> | 0.3135 |
|                     | Tongue                            |        | 1.9x10 <sup>-9</sup>   | 1.1x10 <sup>-8</sup> | 0.4273 |        | -1.5x10 <sup>-9</sup> | 1.2x10 <sup>-8</sup> | 0.5487 |        | 1.3x10 <sup>-8</sup>  | 1.2x10 <sup>-8</sup> | 0.1458 |
|                     | Mouth                             |        | 1.4x10 <sup>-9</sup>   | 1.1x10 <sup>-8</sup> | 0.4462 |        | 7.7x10 <sup>-9</sup>  | 1.1x10 <sup>-8</sup> | 0.2445 |        | -4.2x10 <sup>-9</sup> | 1.2x10 <sup>-8</sup> | 0.6347 |
|                     | Nasopharynx                       |        | -6.2x10 <sup>-9</sup>  | 8x10 <sup>-9</sup>   | 0.7808 |        | 5.9x10 <sup>-10</sup> | 9.4x10 <sup>-9</sup> | 0.4750 |        | -1.4x10 <sup>-8</sup> | 9.4x10 <sup>-9</sup> | 0.9370 |
|                     | Pharynx                           |        | -7.5x10 <sup>-9</sup>  | 7.6x10 <sup>-9</sup> | 0.8368 |        | -4.4x10 <sup>-9</sup> | 8.8x10 <sup>-9</sup> | 0.8556 |        | -3.8x10 <sup>-9</sup> | 1x10 <sup>-8</sup>   | 0.6418 |
|                     | Skin                              |        | -3.5x10 <sup>-10</sup> | 8.8x10 <sup>-9</sup> | 0.5157 |        | 9.2x10 <sup>-9</sup>  | 1x10 <sup>-8</sup>   | 0.1846 |        | -1.5x10 <sup>-8</sup> | 1x10 <sup>-8</sup>   | 0.9280 |
|                     | Bladder                           |        | -7.8x10 <sup>-9</sup>  | 7.4x10 <sup>-9</sup> | 0.8522 |        | -1.2x10 <sup>-8</sup> | 8.9x10 <sup>-9</sup> | 0.9076 |        | 2.5x10 <sup>-9</sup>  | 1.1x10 <sup>-8</sup> | 0.4063 |
|                     | Breast mammary tissue             |        | -2x10 <sup>-9</sup>    | 8.2x10 <sup>-9</sup> | 0.5971 |        | 3.3x10 <sup>-9</sup>  | 9.8x10 <sup>-9</sup> | 0.3693 |        | -5.6x10 <sup>-9</sup> | 8.8x10 <sup>-9</sup> | 0.7389 |
|                     | Kidney cortex                     |        | -6.8x10 <sup>-9</sup>  | 8.1x10 <sup>-9</sup> | 0.8000 |        | -6.5x10 <sup>-9</sup> | 9.7x10 <sup>-9</sup> | 0.7478 |        | -1x10 <sup>-8</sup>   | 9.9x10 <sup>-9</sup> | 0.8454 |
|                     | Lung                              |        | 2.4x10 <sup>-9</sup>   | 8.2x10 <sup>-9</sup> | 0.3842 |        | 7.2x10 <sup>-9</sup>  | 1.1x10 <sup>-8</sup> | 0.2480 |        | -1.1x10 <sup>-9</sup> | 1.1x10 <sup>-8</sup> | 0.5431 |
|                     | Minor salivary gland              |        | 4.5x10 <sup>-9</sup>   | 9.3x10 <sup>-9</sup> | 0.3151 |        | 9.9x10 <sup>-9</sup>  | 1x10 <sup>-8</sup>   | 0.1674 |        | -8.2x10 <sup>-9</sup> | 1x10 <sup>-8</sup>   | 0.7882 |
|                     | Nerve tibial                      |        | 1.5x10 <sup>-8</sup>   | 7.5x10 <sup>-9</sup> | 0.0229 |        | 2.4x10 <sup>-8</sup>  | 9.6x10 <sup>-9</sup> | 0.0060 |        | -1.1x10 <sup>-8</sup> | 8.3x10 <sup>-9</sup> | 0.9015 |
|                     | Skin not sun exposed (suprapubic) |        | 1.1x10 <sup>-8</sup>   | 1x10 <sup>-8</sup>   | 0.1398 |        | 1.4x10 <sup>-8</sup>  | 1x10 <sup>-8</sup>   | 0.0870 |        | 5x10 <sup>-9</sup>    | 1.1x10 <sup>-8</sup> | 0.3204 |
|                     | Skin Sun Exposed (Lower leg)      |        | -1.9x10 <sup>-9</sup>  | 9.2x10 <sup>-9</sup> | 0.5825 |        | 1.2x10 <sup>-9</sup>  | 9.9x10 <sup>-9</sup> | 0.4520 |        | -1.1x10 <sup>-8</sup> | 1.1x10 <sup>-8</sup> | 0.8289 |
| Pancreas            | Islets of Langerhans              | 0.0724 | 2.8x10 <sup>-8</sup>   | 1.3x10 <sup>-8</sup> | 0.0203 | 0.3142 | 2.3x10 <sup>-8</sup>  | 1.7x10 <sup>-8</sup> | 0.0868 | 0.4064 | 1.6x10 <sup>-8</sup>  | 1.3x10 <sup>-8</sup> | 0.1160 |
|                     | Pancreas                          |        | -5.2x10 <sup>-9</sup>  | 8.9x10 <sup>-9</sup> | 0.7223 |        | -1.4x10 <sup>-9</sup> | 1.1x10 <sup>-8</sup> | 0.5511 |        | -2.5x10 <sup>-8</sup> | 1.1x10 <sup>-8</sup> | 0.9905 |
|                     | Pancreas                          |        | -3.7x10 <sup>-9</sup>  | 8.7x10 <sup>-9</sup> | 0.6631 |        | -1.1x10 <sup>-8</sup> | 9.8x10 <sup>-9</sup> | 0.8688 |        | -5x10 <sup>-9</sup>   | 1.1x10 <sup>-8</sup> | 0.6807 |
| Reproductive System | Fallopian tubes                   | 0.6080 | -8.1x10 <sup>-9</sup>  | 8.1x10 <sup>-9</sup> | 0.8407 | 0.3971 | -1.7x10 <sup>-8</sup> | 1x10 <sup>-8</sup>   | 0.9487 | 0.8464 | -4.5x10 <sup>-9</sup> | 1.2x10 <sup>-8</sup> | 0.6517 |
|                     | Ovary                             |        | -1.4x10 <sup>-10</sup> | 8.6x10 <sup>-9</sup> | 0.5066 |        | -5.5x10 <sup>-9</sup> | 1x10 <sup>-8</sup>   | 0.7020 |        | -2.5x10 <sup>-9</sup> | 1.1x10 <sup>-8</sup> | 0.5901 |
|                     | Cervix uteri                      |        | -3.5x10 <sup>-9</sup>  | 1x10 <sup>-8</sup>   | 0.6333 |        | 3.5x10 <sup>-9</sup>  | 1.3x10 <sup>-8</sup> | 0.3943 |        | -1.5x10 <sup>-8</sup> | 1x10 <sup>-8</sup>   | 0.9241 |
|                     | Endometrium                       |        | -8.5x10 <sup>-10</sup> | 8.2x10 <sup>-9</sup> | 0.5412 |        | 1.4x10 <sup>-9</sup>  | 1x10 <sup>-8</sup>   | 0.4441 |        | -7.5x10 <sup>-9</sup> | 9.5x10 <sup>-9</sup> | 0.7851 |
|                     | Uterus                            |        | 3.7x10 <sup>-9</sup>   | 7.9x10 <sup>-9</sup> | 0.3188 |        | 8.7x10 <sup>-9</sup>  | 1x10 <sup>-8</sup>   | 0.1926 |        | -1.1x10 <sup>-8</sup> | 9x10 <sup>-9</sup>   | 0.8954 |
|                     | Vulva                             |        | 4.2x10 <sup>-9</sup>   | 1x10 <sup>-8</sup>   | 0.3433 |        | 5.2x10 <sup>-9</sup>  | 1.2x10 <sup>-8</sup> | 0.3270 |        | 3.1x10 <sup>-9</sup>  | 1.4x10 <sup>-8</sup> | 0.4101 |
|                     | Genitalia female                  |        | -3.7x10 <sup>-11</sup> | 8.8x10 <sup>-9</sup> | 0.5017 |        | -1x10 <sup>-9</sup>   | 1.1x10 <sup>-8</sup> | 0.5353 |        | 1.2x10 <sup>-9</sup>  | 1x10 <sup>-8</sup>   | 0.4525 |
|                     | Foreskin                          |        | -2.2x10 <sup>-9</sup>  | 7.9x10 <sup>-9</sup> | 0.6089 |        | 1.2x10 <sup>-9</sup>  | 9x10 <sup>-9</sup>   | 0.4486 |        | -3.5x10 <sup>-9</sup> | 1.1x10 <sup>-8</sup> | 0.6277 |
|                     | Genitalia male                    |        | -4.8x10 <sup>-9</sup>  | 8.5x10 <sup>-9</sup> | 0.7145 |        | -1.4x10 <sup>-8</sup> | 9.2x10 <sup>-9</sup> | 0.9408 |        | 8.6x10 <sup>-9</sup>  | 1.5x10 <sup>-8</sup> | 0.2803 |
|                     | Germ cells                        |        | -5.8x10 <sup>-9</sup>  | 8.1x10 <sup>-9</sup> | 0.7630 |        | -2x10 <sup>-8</sup>   | 9.1x10 <sup>-9</sup> | 0.9849 |        | 3.2x10 <sup>-9</sup>  | 9.8x10 <sup>-9</sup> | 0.3722 |
|                     | Genitalia                         |        | -8.5x10 <sup>-11</sup> | 8.5x10 <sup>-9</sup> | 0.5040 |        | -5x10 <sup>-9</sup>   | 1x10 <sup>-8</sup>   | 0.6836 |        | -6.3x10 <sup>-9</sup> | 1x10 <sup>-8</sup>   | 0.7319 |
|                     | Testis                            |        | 5.7x10 <sup>-9</sup>   | 7.2x10 <sup>-9</sup> | 0.2139 |        | -6x10 <sup>-9</sup>   | 8.9x10 <sup>-9</sup> | 0.7520 |        | 8x10 <sup>-9</sup>    | 9.9x10 <sup>-9</sup> | 0.2089 |
|                     | Gonads                            |        | 1.2x10 <sup>-9</sup>   | 8.3x10 <sup>-9</sup> | 0.4441 |        | -3.9x10 <sup>-9</sup> | 1x10 <sup>-8</sup>   | 0.6489 |        | -3.4x10 <sup>-9</sup> | 1.1x10 <sup>-8</sup> | 0.6245 |
|                     | Prostate                          |        | -3.6x10 <sup>-9</sup>  | 8.5x10 <sup>-9</sup> | 0.6642 |        | -1.1x10 <sup>-9</sup> | 9.2x10 <sup>-9</sup> | 0.8380 |        | 1.3x10 <sup>-8</sup>  | 1.5x10 <sup>-8</sup> | 0.1997 |
|                     | Oocytes                           |        | -6.5x10 <sup>-9</sup>  | 7.8x10 <sup>-9</sup> | 0.7996 |        | -1.8x10 <sup>-8</sup> | 9.5x10 <sup>-9</sup> | 0.9718 |        | 3.8x10 <sup>-9</sup>  | 1x10 <sup>-8</sup>   | 0.3530 |
|                     | Cervix ectocervix                 |        | -6.3x10 <sup>-9</sup>  | 8.3x10 <sup>-9</sup> | 0.7768 |        | -6.6x10 <sup>-9</sup> | 9.3x10 <sup>-9</sup> | 0.7612 |        | -6x10 <sup>-9</sup>   | 1.2x10 <sup>-8</sup> | 0.6880 |
|                     | Cervix endocervix                 |        | -6x10 <sup>-10</sup>   | 9.2x10 <sup>-9</sup> | 0.5259 |        | 5.3x10 <sup>-9</sup>  | 1.1x10 <sup>-8</sup> | 0.3096 |        | -9.2x10 <sup>-9</sup> | 1.1x10 <sup>-8</sup> | 0.7989 |
|                     | Fallopian tube                    |        | 8.3x10 <sup>-9</sup>   | 9.3x10 <sup>-9</sup> | 0.1880 |        | 2.2x10 <sup>-8</sup>  | 1.1x10 <sup>-8</sup> | 0.0227 |        | 2.7x10 <sup>-9</sup>  | 1x10 <sup>-8</sup>   | 0.3993 |
|                     | Ovary                             |        | 1.6x10 <sup>-8</sup>   | 7.8x10 <sup>-9</sup> | 0.0211 |        | 1.4x10 <sup>-8</sup>  | 8.5x10 <sup>-9</sup> | 0.0488 |        | 1.9x10 <sup>-8</sup>  | 1.2x10 <sup>-8</sup> | 0.0519 |
|                     | Prostate                          |        | -1.3x10 <sup>-9</sup>  | 8.8x10 <sup>-9</sup> | 0.5603 |        | 8.1x10 <sup>-9</sup>  | 1.2x10 <sup>-8</sup> | 0.2421 |        | -5.9x10 <sup>-9</sup> | 1.1x10 <sup>-8</sup> | 0.7081 |
|                     | Testis                            |        | -3.8x10 <sup>-9</sup>  | 6.3x10 <sup>-9</sup> | 0.7283 |        | 1.8x10 <sup>-9</sup>  | 7.9x10 <sup>-9</sup> | 0.4088 |        | -1.1x10 <sup>-8</sup> | 9.3x10 <sup>-9</sup> | 0.8704 |
|                     | Uterus                            |        | 4x10 <sup>-9</sup>     | 8.3x10 <sup>-9</sup> | 0.3164 |        | 1.6x10 <sup>-8</sup>  | 8.9x10 <sup>-9</sup> | 0.0394 |        | -9.2x10 <sup>-9</sup> | 1.2x10 <sup>-8</sup> | 0.7834 |

|        |  |                      |                      |        |  |                      |                      |        |  |                     |                    |        |
|--------|--|----------------------|----------------------|--------|--|----------------------|----------------------|--------|--|---------------------|--------------------|--------|
| Vagina |  | $3.9 \times 10^{-9}$ | $8.1 \times 10^{-9}$ | 0.3150 |  | $7.9 \times 10^{-9}$ | $9.9 \times 10^{-9}$ | 0.2118 |  | $-5 \times 10^{-9}$ | $1 \times 10^{-8}$ | 0.6860 |
|--------|--|----------------------|----------------------|--------|--|----------------------|----------------------|--------|--|---------------------|--------------------|--------|



**Supplementary Table 4. Coefficients, standard errors, and p values for GTex CNS cell lines used for cell-type specific analyses individually and harmonic mean p within tissue category, bold indicates p<0.05**

| Category   | Cell line                         | All glioma      |                       |                      |               | GB              |                       |                      |               | Non-GB          |                       |                      |         |
|------------|-----------------------------------|-----------------|-----------------------|----------------------|---------------|-----------------|-----------------------|----------------------|---------------|-----------------|-----------------------|----------------------|---------|
|            |                                   | p <sub>HM</sub> | Coefficient           | SE                   | P-value       | p <sub>HM</sub> | Coefficient           | SE                   | P             | p <sub>HM</sub> | Coefficient           | SE                   | P-value |
| Cerebellum | Cerebellar hemisphere             | 0.0652          | 1.5x10 <sup>-8</sup>  | 8.2x10 <sup>-9</sup> | <b>0.0354</b> | 0.0850          | 1.8x10 <sup>-8</sup>  | 9.9x10 <sup>-9</sup> | <b>0.0382</b> | 0.3600          | 7.9x10 <sup>-9</sup>  | 1.1x10 <sup>-8</sup> | 0.2415  |
|            | Cerebellum                        |                 | 9x10 <sup>-9</sup>    | 7.4x10 <sup>-9</sup> | 0.1115        |                 | 5x10 <sup>-9</sup>    | 9.7x10 <sup>-9</sup> | 0.3050        |                 | 5.6x10 <sup>-9</sup>  | 1x10 <sup>-8</sup>   | 0.2880  |
| Cortex     | Anterior cingulate cortex (BA24)  | 0.0570          | 1.2x10 <sup>-8</sup>  | 6.1x10 <sup>-9</sup> | <b>0.0268</b> | <b>0.0061</b>   | 2x10 <sup>-8</sup>    | 7.1x10 <sup>-9</sup> | <b>0.0022</b> | 0.2498          | 1.2x10 <sup>-8</sup>  | 8.7x10 <sup>-9</sup> | 0.0799  |
|            | Cortex                            |                 | -2x10 <sup>-9</sup>   | 7.5x10 <sup>-9</sup> | 0.6073        |                 | 1.1x10 <sup>-8</sup>  | 8.7x10 <sup>-9</sup> | 0.0998        |                 | -8.6x10 <sup>-9</sup> | 9.6x10 <sup>-9</sup> | 0.8160  |
|            | Frontal cortex (ba9)              |                 | 1.2x10 <sup>-8</sup>  | 6.8x10 <sup>-9</sup> | <b>0.0398</b> |                 | 1.7x10 <sup>-8</sup>  | 8.2x10 <sup>-9</sup> | <b>0.0187</b> |                 | 6.7x10 <sup>-9</sup>  | 9.4x10 <sup>-9</sup> | 0.2376  |
| Other      | Amygdala                          | 0.5484          | -7x10 <sup>-10</sup>  | 7.4x10 <sup>-9</sup> | 0.5377        | 0.5413          | 9.6x10 <sup>-9</sup>  | 9.1x10 <sup>-9</sup> | 0.1458        | 0.2445          | -4.7x10 <sup>-9</sup> | 9.5x10 <sup>-9</sup> | 0.6896  |
|            | Hippocampus                       |                 | 3.8x10 <sup>-10</sup> | 7.3x10 <sup>-9</sup> | 0.4792        |                 | -2.7x10 <sup>-9</sup> | 8.8x10 <sup>-9</sup> | 0.6195        |                 | 1.5x10 <sup>-8</sup>  | 9.5x10 <sup>-9</sup> | 0.0577  |
|            | Hypothalamus                      |                 | -1.1x10 <sup>-8</sup> | 6.1x10 <sup>-9</sup> | 0.9573        |                 | -1x10 <sup>-8</sup>   | 7.4x10 <sup>-9</sup> | 0.9128        |                 | -1.6x10 <sup>-8</sup> | 8.2x10 <sup>-9</sup> | 0.9779  |
|            | Spinal cord (cervical c-1)        |                 | 8.9x10 <sup>-9</sup>  | 8.1x10 <sup>-9</sup> | 0.1353        |                 | 1.4x10 <sup>-9</sup>  | 8.6x10 <sup>-9</sup> | 0.4350        |                 | 1.6x10 <sup>-8</sup>  | 1.1x10 <sup>-8</sup> | 0.0834  |
|            | Substantia nigra                  |                 | 2.9x10 <sup>-9</sup>  | 7.9x10 <sup>-9</sup> | 0.3569        |                 | 5.5x10 <sup>-9</sup>  | 9.4x10 <sup>-9</sup> | 0.2807        |                 | -7.6x10 <sup>-9</sup> | 9.4x10 <sup>-9</sup> | 0.7899  |
| Striatum   | Caudate (basal ganglia)           | 0.1770          | 1x10 <sup>-8</sup>    | 7.5x10 <sup>-9</sup> | 0.0797        | 0.6505          | 3.9x10 <sup>-10</sup> | 7.6x10 <sup>-9</sup> | 0.4795        | 0.5512          | 1.9x10 <sup>-9</sup>  | 1.1x10 <sup>-8</sup> | 0.4282  |
|            | Nucleus accumbens (basal ganglia) |                 | 8.6x10 <sup>-9</sup>  | 8.3x10 <sup>-9</sup> | 0.1496        |                 | 3.7x10 <sup>-10</sup> | 9x10 <sup>-9</sup>   | 0.4835        |                 | 1.5x10 <sup>-9</sup>  | 9.6x10 <sup>-9</sup> | 0.4397  |
|            | Putamen (basal ganglia)           |                 | 7.4x10 <sup>-9</sup>  | 8.6x10 <sup>-9</sup> | 0.1968        |                 | -4.1x10 <sup>-9</sup> | 9.1x10 <sup>-9</sup> | 0.6731        |                 | 4.6x10 <sup>-9</sup>  | 1.1x10 <sup>-8</sup> | 0.3438  |

**Supplementary Table 5. Coefficients, standard errors, and p values for ImmGen cell lines used for cell-type specific analyses individually and harmonic mean p ( $\rho_{HM}$ ) within major and minor cell type category, bold indicates  $p < 0.05$**

| Major Category            | Minor Category      | Cell line      | All glioma           |                       |                        |                      |                        | GB                    |                      |                        |                      |                      | Non-GB               |                       |                        |                      |               |        |                        |                      |               |
|---------------------------|---------------------|----------------|----------------------|-----------------------|------------------------|----------------------|------------------------|-----------------------|----------------------|------------------------|----------------------|----------------------|----------------------|-----------------------|------------------------|----------------------|---------------|--------|------------------------|----------------------|---------------|
|                           |                     |                | $\rho_{HM}$ (major)  | $\rho_{HM}$ (minor)   | Coefficient            | SE                   | P                      | $\rho_{HM}$ (major)   | $\rho_{HM}$ (minor)  | Coefficient            | SE                   | P                    | $\rho_{HM}$ (major)  | $\rho_{HM}$ (minor)   | Coefficient            | SE                   | P             |        |                        |                      |               |
| B                         | B1 cell             | B1a.PC         | 0.5176               | 0.5719                | -7.5x10 <sup>-10</sup> | 9.6x10 <sup>-9</sup> | 0.5311                 | 0.8306                | 0.6974               | -4.3x10 <sup>-9</sup>  | 1.1x10 <sup>-8</sup> | 0.6487               | 0.0600               | 0.2011                | 1.4x10 <sup>-8</sup>   | 1.6x10 <sup>-8</sup> | 0.1852        |        |                        |                      |               |
|                           |                     | B1a.Sp         |                      |                       | -4.2x10 <sup>-9</sup>  | 1.1x10 <sup>-8</sup> | 0.6522                 |                       |                      | -9.3x10 <sup>-9</sup>  | 1.3x10 <sup>-8</sup> | 0.7602               |                      |                       | 9.9x10 <sup>-9</sup>   | 1.6x10 <sup>-8</sup> | 0.2681        |        |                        |                      |               |
|                           |                     | B1b.PC         |                      |                       | 5.2x10 <sup>-9</sup>   | 8.6x10 <sup>-9</sup> | 0.2714                 |                       |                      | -1.8x10 <sup>-10</sup> | 1.1x10 <sup>-8</sup> | 0.5069               |                      |                       | 2.1x10 <sup>-8</sup>   | 1.5x10 <sup>-8</sup> | 0.0792        |        |                        |                      |               |
|                           | B2 cell             | B.Fo.LN        |                      | 0.4017                | 4.6x10 <sup>-9</sup>   | 8.9x10 <sup>-9</sup> | 0.3027                 |                       | 0.7117               | -2.5x10 <sup>-9</sup>  | 1x10 <sup>-8</sup>   | 0.5979               |                      | 0.0276                | 3.5x10 <sup>-8</sup>   | 1.7x10 <sup>-8</sup> | <b>0.0181</b> |        |                        |                      |               |
|                           |                     | B.Fo.MLN       |                      | 1.2x10 <sup>-8</sup>  | 1x10 <sup>-8</sup>     | 0.1299               | -6.7x10 <sup>-10</sup> |                       |                      | 1.2x10 <sup>-8</sup>   | 0.5228               | 3.6x10 <sup>-8</sup> |                      |                       | 1.5x10 <sup>-8</sup>   | <b>0.0097</b>        |               |        |                        |                      |               |
|                           |                     | B.Fo.PC        |                      | 3.4x10 <sup>-9</sup>  | 9.4x10 <sup>-9</sup>   | 0.3591               | 1.1x10 <sup>-9</sup>   |                       |                      | 1x10 <sup>-8</sup>     | 0.4558               | 2.3x10 <sup>-8</sup> |                      |                       | 1.7x10 <sup>-8</sup>   | 0.0960               |               |        |                        |                      |               |
|                           |                     | B.Fo.Sp        |                      | 2.9x10 <sup>-9</sup>  | 9.7x10 <sup>-9</sup>   | 0.3819               | -3.3x10 <sup>-9</sup>  |                       |                      | 1x10 <sup>-8</sup>     | 0.6263               | 2.9x10 <sup>-8</sup> |                      |                       | 1.7x10 <sup>-8</sup>   | <b>0.0451</b>        |               |        |                        |                      |               |
|                           |                     | B.MZ.Sp        |                      | 9.1x10 <sup>-9</sup>  | 1.1x10 <sup>-8</sup>   | 0.2048               | 4.9x10 <sup>-9</sup>   |                       |                      | 1.3x10 <sup>-8</sup>   | 0.3539               | 2.7x10 <sup>-8</sup> |                      |                       | 1.8x10 <sup>-8</sup>   | 0.0636               |               |        |                        |                      |               |
|                           | Other B cell        | B.FrE.BM       |                      | 0.2447                | 6.9x10 <sup>-9</sup>   | 1x10 <sup>-8</sup>   | 0.2470                 |                       | 0.3964               | -6.4x10 <sup>-9</sup>  | 1.2x10 <sup>-8</sup> | 0.7088               |                      | 0.0266                | 3.1x10 <sup>-8</sup>   | 1.4x10 <sup>-8</sup> | <b>0.0117</b> |        |                        |                      |               |
|                           |                     | B.FrE.FL       |                      | 1.3x10 <sup>-8</sup>  | 1.1x10 <sup>-8</sup>   | 0.1162               | 9.1x10 <sup>-10</sup>  |                       |                      | 1.3x10 <sup>-8</sup>   | 0.4716               | 2.9x10 <sup>-8</sup> |                      |                       | 1.3x10 <sup>-8</sup>   | <b>0.0107</b>        |               |        |                        |                      |               |
|                           |                     | B.FrF.BM       |                      | -4.1x10 <sup>-9</sup> | 9.5x10 <sup>-9</sup>   | 0.6671               | -1.5x10 <sup>-8</sup>  |                       |                      | 1x10 <sup>-8</sup>     | 0.9256               | 2.3x10 <sup>-8</sup> |                      |                       | 1.8x10 <sup>-8</sup>   | 0.0980               |               |        |                        |                      |               |
|                           |                     | B.GC.Sp        |                      | 1.6x10 <sup>-8</sup>  | 1x10 <sup>-8</sup>     | 0.0600               | 1.7x10 <sup>-8</sup>   |                       |                      | 1.1x10 <sup>-8</sup>   | 0.0650               | 2x10 <sup>-8</sup>   |                      |                       | 1.7x10 <sup>-8</sup>   | 0.1198               |               |        |                        |                      |               |
|                           |                     | CD19Control    |                      | 1.2x10 <sup>-9</sup>  | 9.9x10 <sup>-9</sup>   | 0.4513               | -3.9x10 <sup>-9</sup>  |                       |                      | 1.1x10 <sup>-8</sup>   | 0.6386               | 2.6x10 <sup>-8</sup> |                      |                       | 1.7x10 <sup>-8</sup>   | 0.0610               |               |        |                        |                      |               |
|                           | Prx10-B cell        | preB.FrC.BM    |                      | 0.2566                | 1.3x10 <sup>-8</sup>   | 9.9x10 <sup>-9</sup> | 0.0918                 |                       | 0.3682               | 1.5x10 <sup>-8</sup>   | 1.3x10 <sup>-8</sup> | 0.1114               |                      | 0.3675                | -7.1x10 <sup>-10</sup> | 1.3x10 <sup>-8</sup> | 0.5218        |        |                        |                      |               |
|                           |                     | preB.FrD.BM    |                      | 3.6x10 <sup>-9</sup>  | 9x10 <sup>-9</sup>     | 0.3427               | -2.5x10 <sup>-9</sup>  |                       |                      | 1x10 <sup>-8</sup>     | 0.5962               | 5x10 <sup>-9</sup>   |                      |                       | 1.3x10 <sup>-8</sup>   | 0.3499               |               |        |                        |                      |               |
|                           |                     | preB.FrD.FL    |                      | 5.4x10 <sup>-9</sup>  | 8.8x10 <sup>-9</sup>   | 0.2699               | -2.2x10 <sup>-9</sup>  |                       |                      | 9.7x10 <sup>-9</sup>   | 0.5913               | 1.8x10 <sup>-8</sup> |                      |                       | 1.6x10 <sup>-8</sup>   | 0.1317               |               |        |                        |                      |               |
|                           | Pro-B cell          | proB.CLP.BM    |                      | 0.2864                | 8x10 <sup>-9</sup>     | 8.8x10 <sup>-9</sup> | 0.1815                 |                       | 0.4904               | 5.2x10 <sup>-10</sup>  | 1.2x10 <sup>-8</sup> | 0.4823               |                      | 0.2926                | 1.7x10 <sup>-8</sup>   | 1.2x10 <sup>-8</sup> | 0.0697        |        |                        |                      |               |
|                           |                     | proB.CLP.FL    |                      |                       | 5.6x10 <sup>-9</sup>   | 1.1x10 <sup>-8</sup> | 0.2963                 |                       |                      | 4.3x10 <sup>-9</sup>   | 1.3x10 <sup>-8</sup> | 0.3685               |                      |                       | 1.6x10 <sup>-9</sup>   | 1.3x10 <sup>-8</sup> | 0.4521        |        |                        |                      |               |
|                           |                     | proB.FrA.BM    |                      |                       | 1.4x10 <sup>-8</sup>   | 1x10 <sup>-8</sup>   | 0.0875                 |                       |                      | 1.4x10 <sup>-8</sup>   | 1.3x10 <sup>-8</sup> | 0.1403               |                      |                       | 1x10 <sup>-8</sup>     | 1.2x10 <sup>-8</sup> | 0.2023        |        |                        |                      |               |
|                           |                     | proB.FrA.FL    |                      |                       | 1.9x10 <sup>-9</sup>   | 1x10 <sup>-8</sup>   | 0.4281                 |                       |                      | 2.7x10 <sup>-9</sup>   | 1.3x10 <sup>-8</sup> | 0.4171               |                      |                       | -5.9x10 <sup>-9</sup>  | 1.3x10 <sup>-8</sup> | 0.6777        |        |                        |                      |               |
|                           |                     | proB.FrBC.BM   |                      |                       | 5.1x10 <sup>-9</sup>   | 9.9x10 <sup>-9</sup> | 0.3047                 |                       |                      | 7.2x10 <sup>-9</sup>   | 1.3x10 <sup>-8</sup> | 0.2917               |                      |                       | 8.7x10 <sup>-9</sup>   | 1.2x10 <sup>-8</sup> | 0.2281        |        |                        |                      |               |
|                           |                     | proB.FrBC.FL   |                      |                       | 1.5x10 <sup>-8</sup>   | 1.1x10 <sup>-8</sup> | 0.1012                 |                       |                      | 1x10 <sup>-8</sup>     | 1.5x10 <sup>-8</sup> | 0.2421               |                      |                       | 1.5x10 <sup>-8</sup>   | 1.3x10 <sup>-8</sup> | 0.1281        |        |                        |                      |               |
|                           | Transitional B cell | B.T1.Sp        |                      | 0.5839                | -3.3x10 <sup>-9</sup>  | 1x10 <sup>-8</sup>   | 0.6278                 |                       | 0.7597               | -1.6x10 <sup>-8</sup>  | 1.1x10 <sup>-8</sup> | 0.9229               |                      | 0.0489                | 3.1x10 <sup>-8</sup>   | 1.7x10 <sup>-8</sup> | <b>0.0335</b> |        |                        |                      |               |
|                           |                     | B.T2.Sp        |                      |                       | 1.7x10 <sup>-9</sup>   | 9.9x10 <sup>-9</sup> | 0.4307                 |                       |                      | -6.5x10 <sup>-9</sup>  | 1.1x10 <sup>-8</sup> | 0.7251               |                      |                       | 2.7x10 <sup>-8</sup>   | 1.6x10 <sup>-8</sup> | <b>0.0491</b> |        |                        |                      |               |
|                           |                     | B.T3.Sp        |                      |                       | 3.8x10 <sup>-9</sup>   | 9.3x10 <sup>-9</sup> | 0.3388                 |                       |                      | -6.8x10 <sup>-9</sup>  | 9.9x10 <sup>-9</sup> | 0.7536               |                      |                       | 2.9x10 <sup>-8</sup>   | 1.7x10 <sup>-8</sup> | <b>0.0432</b> |        |                        |                      |               |
|                           | Myeloid             | Basophils      |                      | BA.BI                 | 0.0352                 | 0.6400               | -1.6x10 <sup>-9</sup>  |                       | 9x10 <sup>-9</sup>   | 0.5716                 | 0.1491               | 0.6746               |                      | -3.3x10 <sup>-9</sup> | 1.1x10 <sup>-8</sup>   | 0.6223               | 0.0936        | 0.5085 | -5.4x10 <sup>-10</sup> | 1.1x10 <sup>-8</sup> | 0.5199        |
|                           |                     |                |                      | BA.Sp                 |                        |                      | -6x10 <sup>-9</sup>    |                       | 8.7x10 <sup>-9</sup> | 0.7561                 |                      |                      |                      | -1.5x10 <sup>-8</sup> | 9.6x10 <sup>-9</sup>   | 0.9425               |               |        | 4.1x10 <sup>-9</sup>   | 1x10 <sup>-8</sup>   | 0.3459        |
|                           |                     | Dendritic cell |                      | DC.103-11b+24+.Lu     |                        | 0.0079               | 2.2x10 <sup>-8</sup>   |                       | 1x10 <sup>-8</sup>   | <b>0.0161</b>          |                      | 0.0306               |                      | 2.5x10 <sup>-8</sup>  | 1.2x10 <sup>-8</sup>   | <b>0.0236</b>        |               | 0.0186 | 2.9x10 <sup>-8</sup>   | 1.4x10 <sup>-8</sup> | <b>0.0211</b> |
| DC.103+11b-.Lu            |                     |                | 1.5x10 <sup>-8</sup> | 1.1x10 <sup>-8</sup>  |                        |                      | 0.0790                 | 2.2x10 <sup>-8</sup>  | 1.3x10 <sup>-8</sup> | <b>0.0417</b>          |                      |                      | 8.7x10 <sup>-9</sup> | 1.1x10 <sup>-8</sup>  | 0.2159                 |                      |               |        |                        |                      |               |
| DC.103+11b-.Lv            |                     |                | 1.1x10 <sup>-8</sup> | 9.6x10 <sup>-9</sup>  |                        |                      | 0.1275                 | -2x10 <sup>-9</sup>   | 1.1x10 <sup>-8</sup> | 0.5751                 |                      |                      | 2.3x10 <sup>-8</sup> | 1.3x10 <sup>-8</sup>  | <b>0.0422</b>          |                      |               |        |                        |                      |               |
| DC.4+.MLN                 |                     |                | 2.6x10 <sup>-8</sup> | 1.2x10 <sup>-8</sup>  |                        |                      | <b>0.0148</b>          | 2.6x10 <sup>-8</sup>  | 1.5x10 <sup>-8</sup> | <b>0.0375</b>          |                      |                      | 2.7x10 <sup>-8</sup> | 1.5x10 <sup>-8</sup>  | <b>0.0311</b>          |                      |               |        |                        |                      |               |
| DC.4+.SLN                 |                     |                | 3.7x10 <sup>-8</sup> | 1.2x10 <sup>-8</sup>  |                        |                      | <b>0.0012</b>          | 3.3x10 <sup>-8</sup>  | 1.5x10 <sup>-8</sup> | <b>0.0110</b>          |                      |                      | 3.4x10 <sup>-8</sup> | 1.3x10 <sup>-8</sup>  | <b>0.0034</b>          |                      |               |        |                        |                      |               |
| DC.8-.Th                  |                     |                | 1.5x10 <sup>-8</sup> | 1x10 <sup>-8</sup>    |                        |                      | 0.0687                 | 1.9x10 <sup>-8</sup>  | 1.2x10 <sup>-8</sup> | <b>0.0492</b>          |                      |                      | 1.7x10 <sup>-8</sup> | 1.2x10 <sup>-8</sup>  | 0.0771                 |                      |               |        |                        |                      |               |
| DC.8-4-11b-.MLN           |                     |                | 1.7x10 <sup>-8</sup> | 1.1x10 <sup>-8</sup>  |                        |                      | 0.0683                 | 1.5x10 <sup>-8</sup>  | 1.3x10 <sup>-8</sup> | 0.1225                 |                      |                      | 3x10 <sup>-8</sup>   | 1.5x10 <sup>-8</sup>  | <b>0.0252</b>          |                      |               |        |                        |                      |               |
| DC.8-4-11b-.SLN           |                     |                | 2x10 <sup>-8</sup>   | 1.1x10 <sup>-8</sup>  |                        |                      | <b>0.0413</b>          | 1.7x10 <sup>-8</sup>  | 1.3x10 <sup>-8</sup> | 0.0972                 |                      |                      | 3.9x10 <sup>-8</sup> | 1.6x10 <sup>-8</sup>  | <b>0.0062</b>          |                      |               |        |                        |                      |               |
| DC.8-4-11b-.Sp            |                     |                | 2.5x10 <sup>-8</sup> | 1.1x10 <sup>-8</sup>  |                        |                      | <b>0.0127</b>          | 2.5x10 <sup>-8</sup>  | 1.4x10 <sup>-8</sup> | <b>0.0340</b>          |                      |                      | 3.2x10 <sup>-8</sup> | 1.3x10 <sup>-8</sup>  | <b>0.0065</b>          |                      |               |        |                        |                      |               |
| DC.8-4-11b+.MLN           |                     |                | 1.8x10 <sup>-8</sup> | 1.2x10 <sup>-8</sup>  |                        |                      | 0.0644                 | 2.3x10 <sup>-8</sup>  | 1.4x10 <sup>-8</sup> | 0.0503                 |                      |                      | 2.9x10 <sup>-8</sup> | 1.6x10 <sup>-8</sup>  | <b>0.0332</b>          |                      |               |        |                        |                      |               |
| DC.8-4-11b+.SLN           |                     |                | 1.3x10 <sup>-8</sup> | 1.1x10 <sup>-8</sup>  |                        |                      | 0.1245                 | 2.3x10 <sup>-8</sup>  | 1.3x10 <sup>-8</sup> | <b>0.0435</b>          |                      |                      | 2.2x10 <sup>-8</sup> | 1.4x10 <sup>-8</sup>  | 0.0605                 |                      |               |        |                        |                      |               |
| DC.8-4-11b+.Sp            |                     |                | 3.7x10 <sup>-8</sup> | 1.1x10 <sup>-8</sup>  |                        |                      | <b>0.00072</b>         | 3.9x10 <sup>-8</sup>  | 1.4x10 <sup>-8</sup> | <b>0.0023</b>          |                      |                      | 3.2x10 <sup>-8</sup> | 1.5x10 <sup>-8</sup>  | <b>0.0153</b>          |                      |               |        |                        |                      |               |
| DC.8+.MLN                 |                     |                | 1.1x10 <sup>-8</sup> | 1x10 <sup>-8</sup>    |                        |                      | 0.1435                 | 9.5x10 <sup>-9</sup>  | 1.1x10 <sup>-8</sup> | 0.1924                 |                      |                      | 2.5x10 <sup>-8</sup> | 1.5x10 <sup>-8</sup>  | <b>0.0429</b>          |                      |               |        |                        |                      |               |
| DC.8+.SLN                 |                     |                | 2x10 <sup>-8</sup>   | 1x10 <sup>-8</sup>    |                        |                      | <b>0.0272</b>          | 1x10 <sup>-8</sup>    | 1.1x10 <sup>-8</sup> | 0.1707                 |                      |                      | 3.8x10 <sup>-8</sup> | 1.5x10 <sup>-8</sup>  | <b>0.0046</b>          |                      |               |        |                        |                      |               |
| DC.8+.Th                  |                     |                | 1.3x10 <sup>-8</sup> | 9.7x10 <sup>-9</sup>  |                        |                      | 0.0920                 | 1.5x10 <sup>-8</sup>  | 1.2x10 <sup>-8</sup> | 0.0972                 |                      |                      | 1.9x10 <sup>-8</sup> | 1.2x10 <sup>-8</sup>  | 0.0570                 |                      |               |        |                        |                      |               |
| DC.IIhilang-103-11b+.SLN  |                     |                | 1.4x10 <sup>-8</sup> | 1.1x10 <sup>-8</sup>  |                        |                      | 0.1035                 | 1.5x10 <sup>-8</sup>  | 1.4x10 <sup>-8</sup> | 0.1300                 |                      |                      | 2.1x10 <sup>-8</sup> | 1.4x10 <sup>-8</sup>  | 0.0691                 |                      |               |        |                        |                      |               |
| DC.IIhilang-103-11blo.SLN |                     |                | 2.3x10 <sup>-8</sup> | 1.2x10 <sup>-8</sup>  |                        |                      | <b>0.0303</b>          | 2.2x10 <sup>-8</sup>  | 1.4x10 <sup>-8</sup> | 0.0607                 |                      |                      | 2.6x10 <sup>-8</sup> | 1.6x10 <sup>-8</sup>  | <b>0.0443</b>          |                      |               |        |                        |                      |               |
| DC.IIhilang+103-11b+.SLN  |                     |                | 1.6x10 <sup>-8</sup> | 9.9x10 <sup>-9</sup>  |                        |                      | <b>0.0490</b>          | 9.7x10 <sup>-9</sup>  | 1.1x10 <sup>-8</sup> | 0.1955                 |                      |                      | 2.4x10 <sup>-8</sup> | 1.4x10 <sup>-8</sup>  | <b>0.0414</b>          |                      |               |        |                        |                      |               |
| DC.IIhilang+103+11blo.SLN |                     |                | 2.2x10 <sup>-9</sup> | 1.1x10 <sup>-8</sup>  |                        |                      | 0.4238                 | -1.3x10 <sup>-9</sup> | 1.3x10 <sup>-8</sup> | 0.5404                 |                      |                      | 2.2x10 <sup>-8</sup> | 1.6x10 <sup>-8</sup>  | 0.0917                 |                      |               |        |                        |                      |               |

|              |                       |                       |                        |                      |                       |                       |                        |                      |               |                       |                        |                      |               |
|--------------|-----------------------|-----------------------|------------------------|----------------------|-----------------------|-----------------------|------------------------|----------------------|---------------|-----------------------|------------------------|----------------------|---------------|
| Macrophage   | DC.LC.Sk              | 0.7514                | 1.1x10 <sup>-8</sup>   | 1.2x10 <sup>-8</sup> | 0.1752                | 0.5468                | 1x10 <sup>-8</sup>     | 1.4x10 <sup>-8</sup> | 0.2366        | 0.9432                | 1.1x10 <sup>-8</sup>   | 1.5x10 <sup>-8</sup> | 0.2375        |
|              | MF.103-11b+.Lu        |                       | 2.1x10 <sup>-8</sup>   | 1.2x10 <sup>-8</sup> | <b>0.0454</b>         |                       | 2.5x10 <sup>-8</sup>   | 1.4x10 <sup>-8</sup> | <b>0.0429</b> |                       | 1.5x10 <sup>-8</sup>   | 1.2x10 <sup>-8</sup> | 0.1081        |
|              | MF.103-11b+.Salm3.SI  |                       | 3.8x10 <sup>-9</sup>   | 1.1x10 <sup>-8</sup> | 0.3645                |                       | 1.6x10 <sup>-8</sup>   | 1.1x10 <sup>-8</sup> | 0.0833        |                       | -8.1x10 <sup>-9</sup>  | 1.3x10 <sup>-8</sup> | 0.7383        |
|              | MF.103-11b+.SI        |                       | -1x10 <sup>-9</sup>    | 1x10 <sup>-8</sup>   | 0.5403                |                       | 1.1x10 <sup>-8</sup>   | 1.1x10 <sup>-8</sup> | 0.1448        |                       | -4.3x10 <sup>-9</sup>  | 1.2x10 <sup>-8</sup> | 0.6379        |
|              | MF.11c-11b+.Lu        |                       | -1.2x10 <sup>-8</sup>  | 1x10 <sup>-8</sup>   | 0.8866                |                       | -5.6x10 <sup>-9</sup>  | 1.1x10 <sup>-8</sup> | 0.6885        |                       | -2x10 <sup>-8</sup>    | 1.2x10 <sup>-8</sup> | 0.9513        |
|              | MF.11cloSer.Salm3.SI  |                       | 1.1x10 <sup>-9</sup>   | 1.1x10 <sup>-8</sup> | 0.4582                |                       | 1.6x10 <sup>-8</sup>   | 1.1x10 <sup>-8</sup> | 0.0813        |                       | -8.7x10 <sup>-9</sup>  | 1.3x10 <sup>-8</sup> | 0.7540        |
|              | MF.11cloSer.SI        |                       | -8.1x10 <sup>-10</sup> | 1x10 <sup>-8</sup>   | 0.5310                |                       | 1.2x10 <sup>-8</sup>   | 1.1x10 <sup>-8</sup> | 0.1271        |                       | -8.8x10 <sup>-9</sup>  | 1.3x10 <sup>-8</sup> | 0.7512        |
|              | MF.169+11chi.SLN      |                       | 8.7x10 <sup>-9</sup>   | 1x10 <sup>-8</sup>   | 0.1980                |                       | 2.6x10 <sup>-9</sup>   | 1.1x10 <sup>-8</sup> | 0.4096        |                       | 1.1x10 <sup>-8</sup>   | 1.3x10 <sup>-8</sup> | 0.1865        |
|              | MF.480hi.LV.Naive     |                       | -2.4x10 <sup>-9</sup>  | 9x10 <sup>-9</sup>   | 0.6053                |                       | 5.7x10 <sup>-10</sup>  | 9.2x10 <sup>-9</sup> | 0.4755        |                       | -3.6x10 <sup>-9</sup>  | 1.3x10 <sup>-8</sup> | 0.6055        |
|              | MF.480int.LV.Naive    |                       | 2.1x10 <sup>-9</sup>   | 9.9x10 <sup>-9</sup> | 0.4177                |                       | 2.2x10 <sup>-9</sup>   | 1.1x10 <sup>-8</sup> | 0.4193        |                       | -5.8x10 <sup>-9</sup>  | 1.3x10 <sup>-8</sup> | 0.6734        |
|              | MF.Alv.Lu             |                       | 6x10 <sup>-9</sup>     | 8.6x10 <sup>-9</sup> | 0.2425                |                       | 8.6x10 <sup>-9</sup>   | 9.8x10 <sup>-9</sup> | 0.1896        |                       | -4.6x10 <sup>-9</sup>  | 1.1x10 <sup>-8</sup> | 0.6669        |
|              | MF.BM                 |                       | 3.8x10 <sup>-9</sup>   | 1.6x10 <sup>-8</sup> | 0.4046                |                       | -6x10 <sup>-9</sup>    | 1.8x10 <sup>-8</sup> | 0.6295        |                       | 7.3x10 <sup>-9</sup>   | 1.8x10 <sup>-8</sup> | 0.3415        |
|              | MF.F480hi.ctrl.PC     |                       | -1.1x10 <sup>-8</sup>  | 8.6x10 <sup>-9</sup> | 0.9017                |                       | -6.9x10 <sup>-9</sup>  | 9.8x10 <sup>-9</sup> | 0.7579        |                       | -1.9x10 <sup>-8</sup>  | 1.1x10 <sup>-8</sup> | 0.9569        |
|              | MF.F480hi.Gata6ko.PC  |                       | -6.3x10 <sup>-9</sup>  | 8.8x10 <sup>-9</sup> | 0.7634                |                       | -5x10 <sup>-9</sup>    | 1x10 <sup>-8</sup>   | 0.6912        |                       | -1.2x10 <sup>-8</sup>  | 1.1x10 <sup>-8</sup> | 0.8490        |
|              | MF.II-480hi.PC        |                       | -7.3x10 <sup>-10</sup> | 1x10 <sup>-8</sup>   | 0.5288                |                       | 7.3x10 <sup>-9</sup>   | 1.2x10 <sup>-8</sup> | 0.2644        |                       | -1.3x10 <sup>-8</sup>  | 1.3x10 <sup>-8</sup> | 0.5405        |
|              | MF.II+480lo.PC        |                       | 7.5x10 <sup>-10</sup>  | 1.2x10 <sup>-8</sup> | 0.4742                |                       | 3x10 <sup>-9</sup>     | 1.3x10 <sup>-8</sup> | 0.4081        |                       | -2.5x10 <sup>-9</sup>  | 1.5x10 <sup>-8</sup> | 0.5663        |
|              | MF.Lu                 |                       | 7.3x10 <sup>-9</sup>   | 9x10 <sup>-9</sup>   | 0.2089                |                       | 6.6x10 <sup>-9</sup>   | 1x10 <sup>-8</sup>   | 0.2639        |                       | 1.3x10 <sup>-10</sup>  | 1.1x10 <sup>-8</sup> | 0.4952        |
|              | MF.Medl.SLN           |                       | -4.3x10 <sup>-9</sup>  | 9.7x10 <sup>-9</sup> | 0.6701                |                       | -6.2x10 <sup>-9</sup>  | 1.1x10 <sup>-8</sup> | 0.7173        |                       | -1x10 <sup>-8</sup>    | 1.2x10 <sup>-8</sup> | 0.8062        |
|              | MF.Microglia.CNS      |                       | 1.6x10 <sup>-8</sup>   | 1.2x10 <sup>-8</sup> | 0.0983                |                       | 1.5x10 <sup>-8</sup>   | 1.4x10 <sup>-8</sup> | 0.1576        |                       | 1x10 <sup>-8</sup>     | 1.2x10 <sup>-8</sup> | 0.2003        |
|              | MF.PPAR-.Lu           |                       | -1.2x10 <sup>-9</sup>  | 1x10 <sup>-8</sup>   | 0.5478                |                       | -7.9x10 <sup>-10</sup> | 1.2x10 <sup>-8</sup> | 0.5259        |                       | -1x10 <sup>-8</sup>    | 1.3x10 <sup>-8</sup> | 0.7786        |
|              | MF.RP.Sp              |                       | 8.5x10 <sup>-10</sup>  | 9.8x10 <sup>-9</sup> | 0.4656                |                       | 7.3x10 <sup>-9</sup>   | 1.1x10 <sup>-8</sup> | 0.2500        |                       | -8.7x10 <sup>-10</sup> | 1.3x10 <sup>-8</sup> | 0.5263        |
|              | MF.Sbcaps.SLN         |                       | 6.1x10 <sup>-9</sup>   | 9.6x10 <sup>-9</sup> | 0.2640                |                       | -3.5x10 <sup>-9</sup>  | 1.1x10 <sup>-8</sup> | 0.6255        |                       | 5.4x10 <sup>-9</sup>   | 9.7x10 <sup>-9</sup> | 0.2893        |
|              | MF.Thio5.II-480hi.PC  |                       | -8.6x10 <sup>-9</sup>  | 1x10 <sup>-8</sup>   | 0.7980                |                       | 2.6x10 <sup>-9</sup>   | 1.2x10 <sup>-8</sup> | 0.4152        |                       | -2.1x10 <sup>-8</sup>  | 1.4x10 <sup>-8</sup> | 0.9377        |
|              | MF.Thio5.II-480int.PC |                       | -1.3x10 <sup>-8</sup>  | 1.1x10 <sup>-8</sup> | 0.8860                |                       | -4.1x10 <sup>-9</sup>  | 1.2x10 <sup>-8</sup> | 0.6294        |                       | -2.2x10 <sup>-8</sup>  | 1.4x10 <sup>-8</sup> | 0.9468        |
|              | MF.Thio5.II+480int.PC |                       | -1x10 <sup>-8</sup>    | 1.1x10 <sup>-8</sup> | 0.8191                |                       | -2.3x10 <sup>-9</sup>  | 1.2x10 <sup>-8</sup> | 0.5726        |                       | -1.7x10 <sup>-8</sup>  | 1.3x10 <sup>-8</sup> | 0.8903        |
|              | MF.Thio5.II+480lo.PC  |                       | 7.8x10 <sup>-9</sup>   | 1.2x10 <sup>-8</sup> | 0.2520                |                       | 1.1x10 <sup>-8</sup>   | 1.3x10 <sup>-8</sup> | 0.1997        |                       | 3.2x10 <sup>-9</sup>   | 1.5x10 <sup>-8</sup> | 0.4130        |
|              | Mast cell             |                       | MC.digest.PC           | 0.8773               | -1.9x10 <sup>-9</sup> |                       | 8.4x10 <sup>-9</sup>   | 0.5874               | 0.6624        |                       | 4.3x10 <sup>-9</sup>   | 1x10 <sup>-8</sup>   | 0.3364        |
| MC.Es        |                       | -1.1x10 <sup>-8</sup> | 7.9x10 <sup>-9</sup>   |                      | 0.9169                | -3x10 <sup>-9</sup>   | 1.1x10 <sup>-8</sup>   | 0.6113               |               | -1.1x10 <sup>-8</sup> | 9.3x10 <sup>-9</sup>   | 0.8805               |               |
| MC.PC        |                       | -5.6x10 <sup>-9</sup> | 8.7x10 <sup>-9</sup>   |                      | 0.7422                | 5.6x10 <sup>-9</sup>  | 1.1x10 <sup>-8</sup>   | 0.3053               |               | -7x10 <sup>-9</sup>   | 1.1x10 <sup>-8</sup>   | 0.8149               |               |
| MC.Sk        |                       | -1.1x10 <sup>-8</sup> | 7.7x10 <sup>-9</sup>   |                      | 0.9286                | 8.1x10 <sup>-10</sup> | 9.4x10 <sup>-9</sup>   | 0.4655               |               | -2.2x10 <sup>-8</sup> | 1.1x10 <sup>-8</sup>   | 0.9733               |               |
| MC.To        |                       | -1.5x10 <sup>-8</sup> | 7.9x10 <sup>-9</sup>   |                      | 0.9732                | -6.2x10 <sup>-9</sup> | 9.6x10 <sup>-9</sup>   | 0.7397               |               | -1.9x10 <sup>-8</sup> | 1.1x10 <sup>-8</sup>   | 0.9568               |               |
| MC.Tr        |                       | -4.8x10 <sup>-9</sup> | 8.4x10 <sup>-9</sup>   |                      | 0.7153                | 6.5x10 <sup>-9</sup>  | 1.1x10 <sup>-8</sup>   | 0.2751               |               | -1.4x10 <sup>-8</sup> | 1.1x10 <sup>-8</sup>   | 0.9024               |               |
| Monocyte     | Mo.6+2-.BL            | 0.3449                | 2x10 <sup>-9</sup>     | 8.8x10 <sup>-9</sup> | 0.4085                | 0.4782                | 8.1x10 <sup>-10</sup>  | 9.2x10 <sup>-9</sup> | 0.4647        | 0.3741                | 8.8x10 <sup>-9</sup>   | 1.2x10 <sup>-8</sup> | 0.2394        |
|              | Mo.6+2+.BL            |                       | 1.7x10 <sup>-9</sup>   | 1x10 <sup>-8</sup>   | 0.4325                |                       | 4x10 <sup>-9</sup>     | 1x10 <sup>-8</sup>   | 0.3480        |                       | 5.4x10 <sup>-9</sup>   | 1.4x10 <sup>-8</sup> | 0.3457        |
|              | Mo.6+2+.MLN           |                       | 2.4x10 <sup>-9</sup>   | 8.4x10 <sup>-9</sup> | 0.3860                |                       | 2.6x10 <sup>-9</sup>   | 8.8x10 <sup>-9</sup> | 0.3834        |                       | 6.2x10 <sup>-9</sup>   | 1.1x10 <sup>-8</sup> | 0.2880        |
|              | Mo.6+2+.SLN           |                       | 1.5x10 <sup>-9</sup>   | 1x10 <sup>-8</sup>   | 0.4392                |                       | 6.7x10 <sup>-9</sup>   | 1x10 <sup>-8</sup>   | 0.2551        |                       | -1.2x10 <sup>-9</sup>  | 1.3x10 <sup>-8</sup> | 0.5365        |
|              | Mo.6C-II-.Bl          |                       | 1x10 <sup>-9</sup>     | 9.3x10 <sup>-9</sup> | 0.4565                |                       | -5.4x10 <sup>-10</sup> | 9.4x10 <sup>-9</sup> | 0.5227        |                       | 5.5x10 <sup>-9</sup>   | 1.2x10 <sup>-8</sup> | 0.3281        |
|              | Mo.6C-II-.BM          |                       | 1.8x10 <sup>-8</sup>   | 1.3x10 <sup>-8</sup> | 0.0897                |                       | 2.4x10 <sup>-8</sup>   | 1.5x10 <sup>-8</sup> | <b>0.0482</b> |                       | 9.7x10 <sup>-9</sup>   | 1.6x10 <sup>-8</sup> | 0.2783        |
|              | Mo.6C-II+.Bl          |                       | 1.8x10 <sup>-8</sup>   | 9.7x10 <sup>-9</sup> | <b>0.0310</b>         |                       | 7.5x10 <sup>-9</sup>   | 1.1x10 <sup>-8</sup> | 0.2381        |                       | 2x10 <sup>-8</sup>     | 1.1x10 <sup>-8</sup> | <b>0.0302</b> |
|              | Mo.6C-IIint.Bl        |                       | -2.6x10 <sup>-9</sup>  | 9x10 <sup>-9</sup>   | 0.6160                |                       | -3.4x10 <sup>-9</sup>  | 9.4x10 <sup>-9</sup> | 0.6418        |                       | 7.4x10 <sup>-9</sup>   | 1.3x10 <sup>-8</sup> | 0.2761        |
|              | Mo.6C+II-.Bl          |                       | -1x10 <sup>-8</sup>    | 1x10 <sup>-8</sup>   | 0.8466                |                       | -1.3x10 <sup>-8</sup>  | 1.1x10 <sup>-8</sup> | 0.8833        |                       | -2.7x10 <sup>-9</sup>  | 1.3x10 <sup>-8</sup> | 0.5830        |
|              | Mo.6C+II-.BM          |                       | 1.8x10 <sup>-8</sup>   | 1.7x10 <sup>-8</sup> | 0.1400                |                       | 1.7x10 <sup>-8</sup>   | 1.9x10 <sup>-8</sup> | 0.1847        |                       | 1.1x10 <sup>-8</sup>   | 1.8x10 <sup>-8</sup> | 0.2638        |
|              | Mo.6C+II-.LN          |                       | 1.3x10 <sup>-8</sup>   | 1.2x10 <sup>-8</sup> | 0.1540                |                       | 1.5x10 <sup>-8</sup>   | 1.4x10 <sup>-8</sup> | 0.1269        |                       | 1.2x10 <sup>-8</sup>   | 1.3x10 <sup>-8</sup> | 0.1780        |
|              | Mo.6C+II+.Bl          |                       | 4.4x10 <sup>-11</sup>  | 1x10 <sup>-8</sup>   | 0.4983                |                       | -3x10 <sup>-9</sup>    | 1.1x10 <sup>-8</sup> | 0.6083        |                       | 1.6x10 <sup>-9</sup>   | 1.3x10 <sup>-8</sup> | 0.4519        |
|              | Mo.Lu                 |                       | 3x10 <sup>-9</sup>     | 1x10 <sup>-8</sup>   | 0.3879                |                       | 3.6x10 <sup>-9</sup>   | 1.1x10 <sup>-8</sup> | 0.3741        |                       | 4.1x10 <sup>-9</sup>   | 1.5x10 <sup>-8</sup> | 0.3910        |
|              | Neutrophils           |                       | GN.Arth.BM             | 0.4189               | 1.3x10 <sup>-8</sup>  |                       | 1.1x10 <sup>-8</sup>   | 0.1324               | 0.4672        |                       | 1.5x10 <sup>-8</sup>   | 1.2x10 <sup>-8</sup> | 0.1157        |
| GN.Arth.SynF |                       | 5.2x10 <sup>-9</sup>  | 1.2x10 <sup>-8</sup>   |                      | 0.3338                | 5.4x10 <sup>-9</sup>  | 1.4x10 <sup>-8</sup>   | 0.3538               |               | 3x10 <sup>-9</sup>    | 1.3x10 <sup>-8</sup>   | 0.4051               |               |
| GN.Bl        |                       | -1.1x10 <sup>-8</sup> | 1.1x10 <sup>-8</sup>   |                      | 0.8592                | -1.2x10 <sup>-8</sup> | 1.3x10 <sup>-8</sup>   | 0.8303               |               | -1x10 <sup>-8</sup>   | 1.1x10 <sup>-8</sup>   | 0.8201               |               |
| GN.BM        |                       | 1.5x10 <sup>-8</sup>  | 1.2x10 <sup>-8</sup>   |                      | 0.1060                | 1.2x10 <sup>-8</sup>  | 1.4x10 <sup>-8</sup>   | 0.1831               |               | 8.5x10 <sup>-9</sup>  | 1.5x10 <sup>-8</sup>   | 0.2880               |               |
| GN.Thio.PC   |                       | 3.5x10 <sup>-9</sup>  | 1x10 <sup>-8</sup>     |                      | 0.3626                | 5.7x10 <sup>-9</sup>  | 1.1x10 <sup>-8</sup>   | 0.3081               |               | -4.7x10 <sup>-9</sup> | 1.3x10 <sup>-8</sup>   | 0.6362               |               |
| GN.UrAc.PC   |                       | -2.4x10 <sup>-9</sup> | 1.1x10 <sup>-8</sup>   |                      | 0.5857                | -3.8x10 <sup>-9</sup> | 1.3x10 <sup>-8</sup>   | 0.6164               |               | -4.8x10 <sup>-9</sup> | 1.3x10 <sup>-8</sup>   | 0.6397               |               |
| DC.pDC.8-.Sp | 0.2347                | 1.2x10 <sup>-8</sup>  | 1.1x10 <sup>-8</sup>   | 0.1387               | 0.3993                | 9.4x10 <sup>-9</sup>  | 1.2x10 <sup>-8</sup>   | 0.2234               | 0.2765        | 8.7x10 <sup>-9</sup>  | 1.2x10 <sup>-8</sup>   | 0.2330               |               |

|                        |                              |                        |                       |                       |                         |                        |                      |                       |                       |                       |                      |                       |                      |        |                       |                       |                      |                       |                      |        |                       |                      |        |
|------------------------|------------------------------|------------------------|-----------------------|-----------------------|-------------------------|------------------------|----------------------|-----------------------|-----------------------|-----------------------|----------------------|-----------------------|----------------------|--------|-----------------------|-----------------------|----------------------|-----------------------|----------------------|--------|-----------------------|----------------------|--------|
|                        | Plasmacytoid dendritic cell. | DC.pDC.8+.MLN          | 0.0601                | 0.6488                | 1.4x10 <sup>-8</sup>    | 1.1x10 <sup>-8</sup>   | 0.1112               | 0.0201                | 0.7485                | 2.3x10 <sup>-9</sup>  | 1.3x10 <sup>-8</sup> | 0.4298                | 0.4724               | 0.6802 | 1.9x10 <sup>-8</sup>  | 1.3x10 <sup>-8</sup>  | 0.0779               |                       |                      |        |                       |                      |        |
|                        |                              | DC.pDC.8+.SLN          |                       |                       | 9.9x10 <sup>-9</sup>    | 1.1x10 <sup>-8</sup>   | 0.1828               |                       |                       | 9.4x10 <sup>-9</sup>  | 1.3x10 <sup>-8</sup> | 0.2286                |                      |        | 5.6x10 <sup>-9</sup>  | 1.2x10 <sup>-8</sup>  | 0.3133               |                       |                      |        |                       |                      |        |
|                        |                              | DC.pDC.8+.Sp           |                       |                       | 9x10 <sup>-9</sup>      | 1.1x10 <sup>-8</sup>   | 0.2086               |                       |                       | 1.1x10 <sup>-8</sup>  | 1.2x10 <sup>-8</sup> | 0.1975                |                      |        | 3.6x10 <sup>-9</sup>  | 1.2x10 <sup>-8</sup>  | 0.3788               |                       |                      |        |                       |                      |        |
|                        | Stem cell                    | SC.CDP.BM              |                       |                       | 0.5777                  | -3.2x10 <sup>-9</sup>  | 1.1x10 <sup>-8</sup> |                       |                       | 0.6086                | 0.6140               | 9.1x10 <sup>-9</sup>  |                      |        | 1.4x10 <sup>-8</sup>  | 0.2609                | 0.6734               | -6.8x10 <sup>-9</sup> | 1.4x10 <sup>-8</sup> | 0.6881 |                       |                      |        |
|                        |                              | SC.CMP.BM.DR           |                       |                       | 5.1x10 <sup>-9</sup>    | 8.8x10 <sup>-9</sup>   | 0.2815               |                       |                       | 2x10 <sup>-9</sup>    | 1.1x10 <sup>-8</sup> | 0.4255                |                      |        | -3.4x10 <sup>-9</sup> | 1.2x10 <sup>-8</sup>  | 0.6141               |                       |                      |        |                       |                      |        |
|                        |                              | SC.GMP.BM              |                       |                       | 9.3x10 <sup>-9</sup>    | 1.7x10 <sup>-8</sup>   | 0.2899               |                       |                       | -1.5x10 <sup>-9</sup> | 2.1x10 <sup>-8</sup> | 0.5289                |                      |        | 1.2x10 <sup>-8</sup>  | 1.9x10 <sup>-8</sup>  | 0.2510               |                       |                      |        |                       |                      |        |
|                        |                              | SC.MDP.BM              |                       |                       | 3.4x10 <sup>-9</sup>    | 1.1x10 <sup>-8</sup>   | 0.3823               |                       |                       | 2.2x10 <sup>-9</sup>  | 1.4x10 <sup>-8</sup> | 0.4409                |                      |        | 5.3x10 <sup>-9</sup>  | 1.5x10 <sup>-8</sup>  | 0.3609               |                       |                      |        |                       |                      |        |
|                        |                              | SC.MEP.BM              |                       |                       | 4x10 <sup>-9</sup>      | 9.8x10 <sup>-9</sup>   | 0.3403               |                       |                       | 4x10 <sup>-9</sup>    | 1.2x10 <sup>-8</sup> | 0.3692                |                      |        | -6.9x10 <sup>-9</sup> | 1.4x10 <sup>-8</sup>  | 0.6887               |                       |                      |        |                       |                      |        |
|                        |                              | NK                     |                       |                       | Innate Lymphocytes (G3) | ILC3.NKp46-.4-.SI      | 0.6488               |                       |                       | -1.4x10 <sup>-8</sup> | 8x10 <sup>-9</sup>   | 0.9621                |                      |        | 0.7485                | -1.9x10 <sup>-8</sup> | 9.9x10 <sup>-9</sup> | 0.9700                | 0.4724               | 0.6802 | -7.6x10 <sup>-9</sup> | 9.1x10 <sup>-9</sup> | 0.7977 |
|                        |                              |                        |                       |                       |                         | ILC3.NKp46-.4+.SI      | 3.6x10 <sup>-9</sup> |                       |                       | 8.1x10 <sup>-9</sup>  | 0.3292               | -2.5x10 <sup>-9</sup> |                      |        | 9.6x10 <sup>-9</sup>  | 0.6023                | 1.5x10 <sup>-9</sup> | 9.9x10 <sup>-9</sup>  | 0.4406               |        |                       |                      |        |
| ILC3.NKp46+.Rorgthi.SI | -2.8x10 <sup>-9</sup>        |                        | 8.5x10 <sup>-9</sup>  | 0.6280                |                         | -7.1x10 <sup>-9</sup>  | 9.3x10 <sup>-9</sup> | 0.7785                | -3.4x10 <sup>-9</sup> | 1.1x10 <sup>-8</sup>  | 0.6254               |                       |                      |        |                       |                       |                      |                       |                      |        |                       |                      |        |
| NK cell                | NK.49CI-.Sp                  |                        | 0.1282                | 2.8x10 <sup>-9</sup>  | 1x10 <sup>-8</sup>      | 0.3882                 | 0.0127               | 1.5x10 <sup>-8</sup>  | 1.2x10 <sup>-8</sup>  | 0.1033                | 0.9387               | -9.7x10 <sup>-9</sup> | 1.4x10 <sup>-8</sup> | 0.7569 |                       |                       |                      |                       |                      |        |                       |                      |        |
|                        | NK.49CI+.Sp                  |                        | 1.4x10 <sup>-8</sup>  | 9.4x10 <sup>-9</sup>  | 0.0718                  | 3.2x10 <sup>-8</sup>   | 1.1x10 <sup>-8</sup> | 0.0030                | -1.6x10 <sup>-8</sup> | 1x10 <sup>-8</sup>    | 0.9457               |                       |                      |        |                       |                       |                      |                       |                      |        |                       |                      |        |
|                        | NK.49H-.Sp                   |                        | 2x10 <sup>-8</sup>    | 1.3x10 <sup>-8</sup>  | 0.0557                  | 3.6x10 <sup>-8</sup>   | 1.6x10 <sup>-8</sup> | 0.0115                | 1.7x10 <sup>-9</sup>  | 1.2x10 <sup>-8</sup>  | 0.4437               |                       |                      |        |                       |                       |                      |                       |                      |        |                       |                      |        |
|                        | NK.49H+.Sp                   |                        | 1x10 <sup>-8</sup>    | 1.2x10 <sup>-8</sup>  | 0.1918                  | 1.8x10 <sup>-8</sup>   | 1.3x10 <sup>-8</sup> | 0.0858                | -2.9x10 <sup>-9</sup> | 1.4x10 <sup>-8</sup>  | 0.5842               |                       |                      |        |                       |                       |                      |                       |                      |        |                       |                      |        |
|                        | NK.b2m-.Sp                   |                        | 1.1x10 <sup>-8</sup>  | 1x10 <sup>-8</sup>    | 0.1282                  | 2.7x10 <sup>-8</sup>   | 1.2x10 <sup>-8</sup> | 0.0133                | -5.2x10 <sup>-9</sup> | 1.3x10 <sup>-8</sup>  | 0.6534               |                       |                      |        |                       |                       |                      |                       |                      |        |                       |                      |        |
|                        | NK.CD127-.SI                 |                        | -5.3x10 <sup>-9</sup> | 8.9x10 <sup>-9</sup>  | 0.7248                  | -4.5x10 <sup>-9</sup>  | 9.2x10 <sup>-9</sup> | 0.6887                | -5.1x10 <sup>-9</sup> | 1.2x10 <sup>-8</sup>  | 0.6580               |                       |                      |        |                       |                       |                      |                       |                      |        |                       |                      |        |
|                        | NK.CD127-.Sp                 |                        | -1.7x10 <sup>-8</sup> | 8.1x10 <sup>-9</sup>  | 0.9831                  | -2x10 <sup>-8</sup>    | 9.6x10 <sup>-9</sup> | 0.9815                | -5.2x10 <sup>-9</sup> | 1x10 <sup>-8</sup>    | 0.6905               |                       |                      |        |                       |                       |                      |                       |                      |        |                       |                      |        |
|                        | NK.CD49b+.Lv                 | -2.4x10 <sup>-8</sup>  | 7.6x10 <sup>-9</sup>  | 0.9992                | -1.8x10 <sup>-8</sup>   | 8.9x10 <sup>-9</sup>   | 0.9811               | -1.4x10 <sup>-8</sup> | 1x10 <sup>-8</sup>    | 0.9271                |                      |                       |                      |        |                       |                       |                      |                       |                      |        |                       |                      |        |
|                        | NK.DAP10-.Sp                 | 2.1x10 <sup>-8</sup>   | 1.1x10 <sup>-8</sup>  | 0.0254                | 1.5x10 <sup>-8</sup>    | 1.2x10 <sup>-8</sup>   | 0.1137               | 1.2x10 <sup>-8</sup>  | 1.5x10 <sup>-8</sup>  | 0.2200                |                      |                       |                      |        |                       |                       |                      |                       |                      |        |                       |                      |        |
|                        | NK.DAP12-.Sp                 | 7.1x10 <sup>-9</sup>   | 9.6x10 <sup>-9</sup>  | 0.2281                | 1.9x10 <sup>-8</sup>    | 1.2x10 <sup>-8</sup>   | 0.0533               | -9.3x10 <sup>-9</sup> | 1.1x10 <sup>-8</sup>  | 0.8108                |                      |                       |                      |        |                       |                       |                      |                       |                      |        |                       |                      |        |
|                        | NK.H+.MCMV1.Sp               | 1.2x10 <sup>-8</sup>   | 1.1x10 <sup>-8</sup>  | 0.1437                | 2.1x10 <sup>-8</sup>    | 1.3x10 <sup>-8</sup>   | 0.0529               | -9.5x10 <sup>-9</sup> | 1.1x10 <sup>-8</sup>  | 0.7961                |                      |                       |                      |        |                       |                       |                      |                       |                      |        |                       |                      |        |
|                        | NK.H+.MCMV7.Sp               | 1.3x10 <sup>-8</sup>   | 1.1x10 <sup>-8</sup>  | 0.1043                | 2.3x10 <sup>-8</sup>    | 1.3x10 <sup>-8</sup>   | 0.0330               | -4.1x10 <sup>-9</sup> | 1.1x10 <sup>-8</sup>  | 0.6467                |                      |                       |                      |        |                       |                       |                      |                       |                      |        |                       |                      |        |
|                        | NK.MCMV1.Sp                  | 2.3x10 <sup>-8</sup>   | 1.1x10 <sup>-8</sup>  | 0.0160                | 4x10 <sup>-8</sup>      | 1.3x10 <sup>-8</sup>   | 0.0015               | 3x10 <sup>-9</sup>    | 1x10 <sup>-8</sup>    | 0.3873                |                      |                       |                      |        |                       |                       |                      |                       |                      |        |                       |                      |        |
|                        | NK.MCMV7.Sp                  | 5.4x10 <sup>-9</sup>   | 8.9x10 <sup>-9</sup>  | 0.2744                | 4.6x10 <sup>-9</sup>    | 1.1x10 <sup>-8</sup>   | 0.3375               | -7.8x10 <sup>-9</sup> | 1.2x10 <sup>-8</sup>  | 0.7422                |                      |                       |                      |        |                       |                       |                      |                       |                      |        |                       |                      |        |
|                        | NK.Sp                        | 1.3x10 <sup>-8</sup>   | 1.2x10 <sup>-8</sup>  | 0.1437                | 2.7x10 <sup>-8</sup>    | 1.5x10 <sup>-8</sup>   | 0.0384               | -2.9x10 <sup>-9</sup> | 1.1x10 <sup>-8</sup>  | 0.6077                |                      |                       |                      |        |                       |                       |                      |                       |                      |        |                       |                      |        |
|                        | NKT cell                     | NKT.4-.Lv              | 0.0210                | 1.2x10 <sup>-8</sup>  | 1x10 <sup>-8</sup>      | 0.1169                 | 0.0721               | 1.9x10 <sup>-8</sup>  | 1.3x10 <sup>-8</sup>  | 0.0771                | 0.0986               | -5.7x10 <sup>-9</sup> | 1.1x10 <sup>-8</sup> | 0.6983 |                       |                       |                      |                       |                      |        |                       |                      |        |
|                        |                              | NKT.4-.Sp              | 2.1x10 <sup>-8</sup>  | 1.1x10 <sup>-8</sup>  | 0.0284                  | 2.2x10 <sup>-8</sup>   | 1.4x10 <sup>-8</sup> | 0.0608                | 1.1x10 <sup>-8</sup>  | 1.4x10 <sup>-8</sup>  | 0.1977               |                       |                      |        |                       |                       |                      |                       |                      |        |                       |                      |        |
| NKT.4+.Lv              |                              | 1.9x10 <sup>-8</sup>   | 1.1x10 <sup>-8</sup>  | 0.0439                | 2.2x10 <sup>-8</sup>    | 1.4x10 <sup>-8</sup>   | 0.0602               | 1.1x10 <sup>-8</sup>  | 1.8x10 <sup>-8</sup>  | 0.2590                |                      |                       |                      |        |                       |                       |                      |                       |                      |        |                       |                      |        |
| NKT.4+.Sp              |                              | 3.5x10 <sup>-8</sup>   | 1.3x10 <sup>-8</sup>  | 0.0049                | 3.3x10 <sup>-8</sup>    | 1.7x10 <sup>-8</sup>   | 0.0257               | 3x10 <sup>-8</sup>    | 1.4x10 <sup>-8</sup>  | 0.0158                |                      |                       |                      |        |                       |                       |                      |                       |                      |        |                       |                      |        |
| NKT.44-NK1.1-.Th       |                              | 2.6x10 <sup>-8</sup>   | 1.1x10 <sup>-8</sup>  | 0.0100                | 2.5x10 <sup>-8</sup>    | 1.4x10 <sup>-8</sup>   | 0.0345               | 2x10 <sup>-8</sup>    | 1.2x10 <sup>-8</sup>  | 0.0482                |                      |                       |                      |        |                       |                       |                      |                       |                      |        |                       |                      |        |
| NKT.44+NK1.1-.Th       |                              | 2x10 <sup>-9</sup>     | 9.2x10 <sup>-9</sup>  | 0.4145                | -5.7x10 <sup>-9</sup>   | 1.1x10 <sup>-8</sup>   | 0.6965               | 7x10 <sup>-9</sup>    | 1.2x10 <sup>-8</sup>  | 0.2834                |                      |                       |                      |        |                       |                       |                      |                       |                      |        |                       |                      |        |
| NKT.44+NK1.1+.Th       |                              | 2.3x10 <sup>-9</sup>   | 1x10 <sup>-8</sup>    | 0.4089                | 1.8x10 <sup>-8</sup>    | 1.3x10 <sup>-8</sup>   | 0.0799               | -9.4x10 <sup>-9</sup> | 1.2x10 <sup>-8</sup>  | 0.7908                |                      |                       |                      |        |                       |                       |                      |                       |                      |        |                       |                      |        |
| Other                  |                              | Blood Endothelial cell | BEC.MLN               | 0.5133                | 0.1218                  | 1.2x10 <sup>-8</sup>   | 1.1x10 <sup>-8</sup> | 0.1426                | 0.0724                | 0.2621                | 9x10 <sup>-9</sup>   | 1.4x10 <sup>-8</sup>  | 0.2588               | 0.9237 | 0.4063                | 7.4x10 <sup>-9</sup>  | 1.1x10 <sup>-8</sup> | 0.2578                |                      |        |                       |                      |        |
|                        | BEC.SLN                      |                        | 1.4x10 <sup>-8</sup>  | 9.5x10 <sup>-9</sup>  | 0.0692                  | 1.2x10 <sup>-8</sup>   | 1.2x10 <sup>-8</sup> | 0.1475                | 3.4x10 <sup>-9</sup>  | 1x10 <sup>-8</sup>    | 0.3689               |                       |                      |        |                       |                       |                      |                       |                      |        |                       |                      |        |
|                        | Epithelial cell              | Ep.5wk.MEC.Sca1+.Th    | 0.8507                | -2.6x10 <sup>-9</sup> | 8.4x10 <sup>-9</sup>    | 0.6218                 | 0.7777               | 2.9x10 <sup>-9</sup>  | 1x10 <sup>-8</sup>    | 0.3884                | 0.9212               | -1.2x10 <sup>-8</sup> | 9.1x10 <sup>-9</sup> | 0.9113 |                       |                       |                      |                       |                      |        |                       |                      |        |
|                        |                              | Ep.5wk.MEChi.Th        | -1.9x10 <sup>-9</sup> | 8.8x10 <sup>-9</sup>  | 0.5837                  | 1.8x10 <sup>-9</sup>   | 1.1x10 <sup>-8</sup> | 0.4312                | -4.5x10 <sup>-9</sup> | 9.6x10 <sup>-9</sup>  | 0.6787               |                       |                      |        |                       |                       |                      |                       |                      |        |                       |                      |        |
|                        |                              | Ep.5wk.MEClo.Th        | -1.5x10 <sup>-9</sup> | 8x10 <sup>-9</sup>    | 0.5754                  | 3.7x10 <sup>-9</sup>   | 9.4x10 <sup>-9</sup> | 0.3481                | -1.7x10 <sup>-8</sup> | 9.2x10 <sup>-9</sup>  | 0.9680               |                       |                      |        |                       |                       |                      |                       |                      |        |                       |                      |        |
|                        |                              | Ep.8wk.CEC.Sca1+.Th    | -8.5x10 <sup>-9</sup> | 7.7x10 <sup>-9</sup>  | 0.8647                  | -8.1x10 <sup>-9</sup>  | 9.7x10 <sup>-9</sup> | 0.7988                | -1.4x10 <sup>-8</sup> | 9.5x10 <sup>-9</sup>  | 0.9370               |                       |                      |        |                       |                       |                      |                       |                      |        |                       |                      |        |
|                        |                              | Ep.8wk.CEChi.Th        | -1.1x10 <sup>-8</sup> | 8.4x10 <sup>-9</sup>  | 0.9097                  | -8.6x10 <sup>-9</sup>  | 1x10 <sup>-8</sup>   | 0.8017                | -1.5x10 <sup>-8</sup> | 9.3x10 <sup>-9</sup>  | 0.9463               |                       |                      |        |                       |                       |                      |                       |                      |        |                       |                      |        |
|                        |                              | Ep.8wk.MEChi.Th        | -1.8x10 <sup>-9</sup> | 9.2x10 <sup>-9</sup>  | 0.5773                  | -6.7x10 <sup>-10</sup> | 1.1x10 <sup>-8</sup> | 0.5251                | -2.4x10 <sup>-9</sup> | 1x10 <sup>-8</sup>    | 0.5954               |                       |                      |        |                       |                       |                      |                       |                      |        |                       |                      |        |
|                        |                              | Ep.8wk.MEClo.Th        | -3.8x10 <sup>-9</sup> | 7.4x10 <sup>-9</sup>  | 0.6975                  | -8x10 <sup>-10</sup>   | 9.3x10 <sup>-9</sup> | 0.5345                | -1.8x10 <sup>-8</sup> | 9x10 <sup>-9</sup>    | 0.9765               |                       |                      |        |                       |                       |                      |                       |                      |        |                       |                      |        |
|                        |                              | Ep.MEChi.Th            | 4.2x10 <sup>-9</sup>  | 8x10 <sup>-9</sup>    | 0.3004                  | 4.1x10 <sup>-9</sup>   | 8.7x10 <sup>-9</sup> | 0.3214                | -3x10 <sup>-9</sup>   | 9.5x10 <sup>-9</sup>  | 0.6229               |                       |                      |        |                       |                       |                      |                       |                      |        |                       |                      |        |
|                        | Fibroblasts                  | Fi.MTS15+.Th           | 0.1178                | 1.6x10 <sup>-8</sup>  | 8.6x10 <sup>-9</sup>    | 0.0290                 | 0.3734               | 1.2x10 <sup>-8</sup>  | 9.8x10 <sup>-9</sup>  | 0.1083                | 0.3691               | 1.1x10 <sup>-8</sup>  | 1.1x10 <sup>-8</sup> | 0.1527 |                       |                       |                      |                       |                      |        |                       |                      |        |
|                        |                              | Fi.Sk                  | 9.3x10 <sup>-9</sup>  | 1x10 <sup>-8</sup>    | 0.1742                  | 6.2x10 <sup>-9</sup>   | 1.2x10 <sup>-8</sup> | 0.2959                | 7.8x10 <sup>-9</sup>  | 1.1x10 <sup>-8</sup>  | 0.2339               |                       |                      |        |                       |                       |                      |                       |                      |        |                       |                      |        |
|                        |                              | FRC.MLN                | 6.3x10 <sup>-9</sup>  | 9x10 <sup>-9</sup>    | 0.2419                  | 3.6x10 <sup>-9</sup>   | 1.2x10 <sup>-8</sup> | 0.3788                | 5x10 <sup>-9</sup>    | 1.1x10 <sup>-8</sup>  | 0.3197               |                       |                      |        |                       |                       |                      |                       |                      |        |                       |                      |        |
|                        |                              | FRC.SLN                | 2.7x10 <sup>-9</sup>  | 8.4x10 <sup>-9</sup>  | 0.3731                  | 8x10 <sup>-10</sup>    | 1.2x10 <sup>-8</sup> | 0.4725                | 5.9x10 <sup>-9</sup>  | 1x10 <sup>-8</sup>    | 0.2763               |                       |                      |        |                       |                       |                      |                       |                      |        |                       |                      |        |
|                        | Innate Lymphocytes (G1/G2)   | ILC1.CD127+.SI         | 0.5801                | 3.8x10 <sup>-9</sup>  | 9.6x10 <sup>-9</sup>    | 0.3447                 | 0.5496               | 1.1x10 <sup>-8</sup>  | 1.2x10 <sup>-8</sup>  | 0.1818                | 0.3741               | -4.7x10 <sup>-9</sup> | 1.2x10 <sup>-8</sup> | 0.6574 |                       |                       |                      |                       |                      |        |                       |                      |        |
|                        |                              | ILC1.CD127+.Sp         | -2.1x10 <sup>-8</sup> | 7.2x10 <sup>-9</sup>  | 0.9983                  | -2.2x10 <sup>-8</sup>  | 8.5x10 <sup>-9</sup> | 0.9957                | -1.5x10 <sup>-8</sup> | 8.8x10 <sup>-9</sup>  | 0.9546               |                       |                      |        |                       |                       |                      |                       |                      |        |                       |                      |        |
|                        |                              | ILC1.CD49b-.Lv         | -1x10 <sup>-8</sup>   | 9.4x10 <sup>-9</sup>  | 0.8614                  | -8.5x10 <sup>-9</sup>  | 1.1x10 <sup>-8</sup> | 0.7806                | -1.2x10 <sup>-8</sup> | 1x10 <sup>-8</sup>    | 0.8875               |                       |                      |        |                       |                       |                      |                       |                      |        |                       |                      |        |
|                        |                              | ILC2.SI                | 7.6x10 <sup>-9</sup>  | 8.6x10 <sup>-9</sup>  | 0.1872                  | 4.6x10 <sup>-9</sup>   | 8.4x10 <sup>-9</sup> | 0.2913                | 1.6x10 <sup>-8</sup>  | 1.1x10 <sup>-8</sup>  | 0.0733               |                       |                      |        |                       |                       |                      |                       |                      |        |                       |                      |        |

|                            |                      |                      |        |                      |                       |                       |                       |                      |                      |                      |                        |                      |        |        |                       |                      |                      |                      |        |
|----------------------------|----------------------|----------------------|--------|----------------------|-----------------------|-----------------------|-----------------------|----------------------|----------------------|----------------------|------------------------|----------------------|--------|--------|-----------------------|----------------------|----------------------|----------------------|--------|
|                            | Stem cell            | MLP.BM               | 0.0405 | 0.2782               | 1.6x10 <sup>-9</sup>  | 9.6x10 <sup>-9</sup>  | 0.4358                | 0.0944               | 0.0157               | 1.5x10 <sup>-8</sup> | 1.2x10 <sup>-8</sup>   | 0.1055               | 0.1284 | 0.8550 | -1.1x10 <sup>-8</sup> | 1.3x10 <sup>-8</sup> | 0.8180               |                      |        |
|                            |                      | MLP.FL               |        |                      | 6.5x10 <sup>-9</sup>  | 9.7x10 <sup>-9</sup>  | 0.2529                |                      |                      | 4.8x10 <sup>-9</sup> | 1.1x10 <sup>-8</sup>   | 0.3376               |        |        | 6.6x10 <sup>-9</sup>  | 1.3x10 <sup>-8</sup> | 0.3085               |                      |        |
|                            |                      | SC.LT34F.BM          |        |                      | 7.6x10 <sup>-9</sup>  | 8.3x10 <sup>-9</sup>  | 0.1810                |                      |                      | 1.6x10 <sup>-8</sup> | 1.1x10 <sup>-8</sup>   | 0.0638               |        |        | 3.8x10 <sup>-9</sup>  | 1.1x10 <sup>-8</sup> | 0.3608               |                      |        |
|                            |                      | SC.LTSL.FL           |        |                      | 8.3x10 <sup>-9</sup>  | 8.9x10 <sup>-9</sup>  | 0.1752                |                      |                      | 2.6x10 <sup>-8</sup> | 1.1x10 <sup>-8</sup>   | 0.0101               |        |        | -1.7x10 <sup>-8</sup> | 1.2x10 <sup>-8</sup> | 0.9309               |                      |        |
|                            |                      | SC.MPP34F.BM         |        |                      | 1.2x10 <sup>-8</sup>  | 9.5x10 <sup>-9</sup>  | 0.0947                |                      |                      | 2.3x10 <sup>-8</sup> | 1.2x10 <sup>-8</sup>   | 0.0279               |        |        | -5.5x10 <sup>-9</sup> | 1.2x10 <sup>-8</sup> | 0.6741               |                      |        |
|                            |                      | SC.ST34F.BM          |        |                      | 1x10 <sup>-8</sup>    | 8.9x10 <sup>-9</sup>  | 0.1301                |                      |                      | 2.6x10 <sup>-8</sup> | 1.2x10 <sup>-8</sup>   | 0.0145               |        |        | -8.9x10 <sup>-9</sup> | 1.2x10 <sup>-8</sup> | 0.7718               |                      |        |
|                            |                      | SC.STSL.BM           |        |                      | -4.4x10 <sup>-9</sup> | 8.4x10 <sup>-9</sup>  | 0.6990                |                      |                      | 4.5x10 <sup>-9</sup> | 1x10 <sup>-8</sup>     | 0.3324               |        |        | -9.4x10 <sup>-9</sup> | 1.1x10 <sup>-8</sup> | 0.8108               |                      |        |
|                            |                      | SC.STSL.FL           |        |                      | 1.4x10 <sup>-8</sup>  | 9.5x10 <sup>-9</sup>  | 0.0712                |                      |                      | 2.9x10 <sup>-8</sup> | 1.1x10 <sup>-8</sup>   | 0.0031               |        |        | -9.5x10 <sup>-9</sup> | 1.2x10 <sup>-8</sup> | 0.7818               |                      |        |
|                            | Stromal cell         | LEC.MLN              |        | 0.5157               | 0.6153                | 1.1x10 <sup>-8</sup>  | 9.2x10 <sup>-9</sup>  |                      | 0.1183               | 0.5622               | 8.4x10 <sup>-9</sup>   | 1.2x10 <sup>-8</sup> |        | 0.2391 | 9.8x10 <sup>-9</sup>  | 1x10 <sup>-8</sup>   | 0.1726               |                      |        |
|                            |                      | LEC.SLN              |        |                      |                       | 7.9x10 <sup>-9</sup>  | 9.2x10 <sup>-9</sup>  |                      | 0.1954               |                      | 6.8x10 <sup>-9</sup>   | 1.2x10 <sup>-8</sup> |        | 0.2856 | 1.1x10 <sup>-8</sup>  | 1x10 <sup>-8</sup>   | 0.1514               |                      |        |
|                            |                      | MEChi.GFP-.Adult     |        |                      |                       | -4.8x10 <sup>-9</sup> | 7.4x10 <sup>-9</sup>  |                      | 0.7400               |                      | 1.8x10 <sup>-9</sup>   | 8.6x10 <sup>-9</sup> |        | 0.4182 | -3.4x10 <sup>-9</sup> | 9.7x10 <sup>-9</sup> | 0.6385               |                      |        |
|                            |                      | MEChi.GFP+.Adult     |        |                      |                       | -2.6x10 <sup>-9</sup> | 9.1x10 <sup>-9</sup>  |                      | 0.6129               |                      | 2.7x10 <sup>-9</sup>   | 1.1x10 <sup>-8</sup> |        | 0.3999 | -9.8x10 <sup>-9</sup> | 9.7x10 <sup>-9</sup> | 0.8421               |                      |        |
|                            |                      | MEChi.GFP+.Adult.KO  |        |                      |                       | 4.8x10 <sup>-10</sup> | 8x10 <sup>-9</sup>    |                      | 0.4762               |                      | 3.8x10 <sup>-9</sup>   | 9.5x10 <sup>-9</sup> |        | 0.3447 | -5.7x10 <sup>-9</sup> | 8.3x10 <sup>-9</sup> | 0.7554               |                      |        |
|                            |                      | St.31-38-44-.SLN     |        |                      |                       | 3.4x10 <sup>-10</sup> | 8.9x10 <sup>-9</sup>  |                      | 0.4848               |                      | -1x10 <sup>-8</sup>    | 1.1x10 <sup>-8</sup> |        | 0.8148 | 1.5x10 <sup>-9</sup>  | 1x10 <sup>-8</sup>   | 0.4401               |                      |        |
| T                          | CD4-/CD8-T cell      | T.DN4.Th             | 0.0405 | 0.0265               | 2x10 <sup>-8</sup>    | 1x10 <sup>-8</sup>    | 0.0242                | 0.0944               | 0.0295               | 2.4x10 <sup>-8</sup> | 1.3x10 <sup>-8</sup>   | 0.0268               | 0.1284 | 0.1067 | 1.7x10 <sup>-8</sup>  | 1.2x10 <sup>-8</sup> | 0.0880               |                      |        |
| CD4+ T cell                | ABD.TR.14w.B6        | 0.0369               |        |                      | 0.1203                | 1.9x10 <sup>-9</sup>  | 1.2x10 <sup>-8</sup>  |                      |                      | 0.4343               | 0.0820                 | 3x10 <sup>-9</sup>   |        |        | 1.4x10 <sup>-8</sup>  | 0.4134               | 1.2x10 <sup>-8</sup> | 1.8x10 <sup>-8</sup> | 0.2491 |
|                            | CD4.1h.LN            |                      |        |                      |                       | 6.8x10 <sup>-9</sup>  | 9.9x10 <sup>-9</sup>  |                      |                      | 0.2470               |                        | 5.5x10 <sup>-9</sup> |        |        | 1.2x10 <sup>-8</sup>  | 0.3206               | 1.7x10 <sup>-8</sup> | 1.4x10 <sup>-8</sup> | 0.1110 |
|                            | CD4.24h.LN           |                      |        |                      |                       | 2.2x10 <sup>-8</sup>  | 1.1x10 <sup>-8</sup>  |                      |                      | 0.0222               |                        | 3.1x10 <sup>-8</sup> |        |        | 1.4x10 <sup>-8</sup>  | 0.0110               | 6.8x10 <sup>-9</sup> | 1.4x10 <sup>-8</sup> | 0.3085 |
|                            | CD4.48h.LN           |                      |        |                      |                       | 2.8x10 <sup>-8</sup>  | 1.1x10 <sup>-8</sup>  |                      |                      | 0.0048               |                        | 2.2x10 <sup>-8</sup> |        |        | 1.3x10 <sup>-8</sup>  | 0.0431               | 2.9x10 <sup>-8</sup> | 1.3x10 <sup>-8</sup> | 0.0141 |
|                            | CD4.5h.LN            |                      |        |                      |                       | 1.6x10 <sup>-8</sup>  | 1.2x10 <sup>-8</sup>  |                      |                      | 0.0976               |                        | 2.9x10 <sup>-8</sup> |        |        | 1.6x10 <sup>-8</sup>  | 0.0315               | 4.7x10 <sup>-9</sup> | 1.4x10 <sup>-8</sup> | 0.3655 |
|                            | CD4.96h.LN           |                      |        |                      |                       | 7.2x10 <sup>-9</sup>  | 1x10 <sup>-8</sup>    |                      |                      | 0.2397               |                        | 5.8x10 <sup>-9</sup> |        |        | 1.3x10 <sup>-8</sup>  | 0.3220               | 1.1x10 <sup>-8</sup> | 1.2x10 <sup>-8</sup> | 0.1857 |
|                            | CD4.CTR.LN           |                      |        |                      |                       | 1.3x10 <sup>-8</sup>  | 1x10 <sup>-8</sup>    |                      |                      | 0.1054               |                        | 8.4x10 <sup>-9</sup> |        |        | 1.3x10 <sup>-8</sup>  | 0.2616               | 1.7x10 <sup>-8</sup> | 1.2x10 <sup>-8</sup> | 0.0788 |
|                            | CD4Control           |                      |        |                      |                       | 1.5x10 <sup>-8</sup>  | 1.1x10 <sup>-8</sup>  |                      |                      | 0.0810               |                        | 1.5x10 <sup>-8</sup> |        |        | 1.3x10 <sup>-8</sup>  | 0.1340               | 1.9x10 <sup>-8</sup> | 1.7x10 <sup>-8</sup> | 0.1324 |
|                            | LN.TR.14w.B6         |                      |        |                      |                       | 8.9x10 <sup>-9</sup>  | 1.2x10 <sup>-8</sup>  |                      |                      | 0.2259               |                        | 1.9x10 <sup>-9</sup> |        |        | 1.4x10 <sup>-8</sup>  | 0.4464               | 2.2x10 <sup>-8</sup> | 1.9x10 <sup>-8</sup> | 0.1231 |
|                            | T.4.LN.BDC           |                      |        |                      |                       | 2.1x10 <sup>-8</sup>  | 1.3x10 <sup>-8</sup>  |                      |                      | 0.0558               |                        | 2.4x10 <sup>-8</sup> |        |        | 1.5x10 <sup>-8</sup>  | 0.0619               | 1.4x10 <sup>-8</sup> | 1.4x10 <sup>-8</sup> | 0.1565 |
|                            | T.4.Pa.BDC           |                      |        |                      |                       | 1.7x10 <sup>-8</sup>  | 1.1x10 <sup>-8</sup>  |                      |                      | 0.0656               |                        | 7.5x10 <sup>-9</sup> |        |        | 1.3x10 <sup>-8</sup>  | 0.2871               | 3.2x10 <sup>-8</sup> | 1.9x10 <sup>-8</sup> | 0.0458 |
|                            | T.4.PLN.BDC          |                      |        |                      |                       | 1.8x10 <sup>-8</sup>  | 1.3x10 <sup>-8</sup>  |                      |                      | 0.0719               |                        | 8.4x10 <sup>-9</sup> |        |        | 1.5x10 <sup>-8</sup>  | 0.2918               | 2.2x10 <sup>-8</sup> | 1.3x10 <sup>-8</sup> | 0.0470 |
|                            | T.4+8int.Th          |                      |        |                      |                       | 1.7x10 <sup>-8</sup>  | 9.8x10 <sup>-9</sup>  |                      |                      | 0.0444               |                        | 2.5x10 <sup>-9</sup> |        |        | 1.2x10 <sup>-8</sup>  | 0.4155               | 2x10 <sup>-8</sup>   | 1.3x10 <sup>-8</sup> | 0.0537 |
| T.4Eff49d+11a+.Sp.d8.LCMV  | 1x10 <sup>-8</sup>   | 1.1x10 <sup>-8</sup> | 0.1676 | 1.3x10 <sup>-8</sup> | 1.4x10 <sup>-8</sup>  | 0.1806                | 1.3x10 <sup>-8</sup>  | 1.4x10 <sup>-8</sup> | 0.1836               |                      |                        |                      |        |        |                       |                      |                      |                      |        |
| T.4FP3-.Sp                 | 2.4x10 <sup>-8</sup> | 1.2x10 <sup>-8</sup> | 0.0223 | 2.4x10 <sup>-8</sup> | 1.5x10 <sup>-8</sup>  | 0.0567                | 2.5x10 <sup>-8</sup>  | 1.1x10 <sup>-8</sup> | 0.0109               |                      |                        |                      |        |        |                       |                      |                      |                      |        |
| T.4FP3+25+.Sp              | 2.2x10 <sup>-8</sup> | 1.2x10 <sup>-8</sup> | 0.0292 | 1.8x10 <sup>-8</sup> | 1.4x10 <sup>-8</sup>  | 0.1049                | 2x10 <sup>-8</sup>    | 1.2x10 <sup>-8</sup> | 0.0523               |                      |                        |                      |        |        |                       |                      |                      |                      |        |
| T.4int8+.Th                | 2.6x10 <sup>-8</sup> | 1.2x10 <sup>-8</sup> | 0.0135 | 1.3x10 <sup>-8</sup> | 1.4x10 <sup>-8</sup>  | 0.1777                | 2.5x10 <sup>-8</sup>  | 1.6x10 <sup>-8</sup> | 0.0573               |                      |                        |                      |        |        |                       |                      |                      |                      |        |
| T.4Mem.LN                  | 3.1x10 <sup>-8</sup> | 1.3x10 <sup>-8</sup> | 0.0069 | 3.1x10 <sup>-8</sup> | 1.5x10 <sup>-8</sup>  | 0.0197                | 2.4x10 <sup>-8</sup>  | 1.6x10 <sup>-8</sup> | 0.0691               |                      |                        |                      |        |        |                       |                      |                      |                      |        |
| T.4Mem.Sp                  | 7.5x10 <sup>-9</sup> | 1.2x10 <sup>-8</sup> | 0.2601 | 2.2x10 <sup>-8</sup> | 1.4x10 <sup>-8</sup>  | 0.0612                | 1.2x10 <sup>-9</sup>  | 1.6x10 <sup>-8</sup> | 0.4691               |                      |                        |                      |        |        |                       |                      |                      |                      |        |
| T.4Mem44h62l.LN            | 6.5x10 <sup>-9</sup> | 1.2x10 <sup>-8</sup> | 0.2878 | 1.2x10 <sup>-8</sup> | 1.4x10 <sup>-8</sup>  | 0.2005                | -2.2x10 <sup>-9</sup> | 1.3x10 <sup>-8</sup> | 0.5662               |                      |                        |                      |        |        |                       |                      |                      |                      |        |
| T.4Mem44h62l.Sp            | 4.2x10 <sup>-9</sup> | 1x10 <sup>-8</sup>   | 0.3405 | 9.8x10 <sup>-9</sup> | 1.3x10 <sup>-8</sup>  | 0.2258                | -5.8x10 <sup>-9</sup> | 1.3x10 <sup>-8</sup> | 0.6766               |                      |                        |                      |        |        |                       |                      |                      |                      |        |
| T.4Mem49d+11a+.Sp.d30.LCMV | 1.1x10 <sup>-8</sup> | 1x10 <sup>-8</sup>   | 0.1285 | 1.7x10 <sup>-8</sup> | 1.2x10 <sup>-8</sup>  | 0.0803                | 1.7x10 <sup>-8</sup>  | 1.2x10 <sup>-8</sup> | 0.0823               |                      |                        |                      |        |        |                       |                      |                      |                      |        |
| T.4Nve.LN                  | 1.3x10 <sup>-8</sup> | 1.2x10 <sup>-8</sup> | 0.1461 | 1.2x10 <sup>-8</sup> | 1.5x10 <sup>-8</sup>  | 0.2148                | 5.6x10 <sup>-9</sup>  | 1.3x10 <sup>-8</sup> | 0.3306               |                      |                        |                      |        |        |                       |                      |                      |                      |        |
| T.4Nve.MLN                 | 2.3x10 <sup>-8</sup> | 1.2x10 <sup>-8</sup> | 0.0276 | 1.4x10 <sup>-8</sup> | 1.4x10 <sup>-8</sup>  | 0.1606                | 2.5x10 <sup>-8</sup>  | 1.2x10 <sup>-8</sup> | 0.0196               |                      |                        |                      |        |        |                       |                      |                      |                      |        |
| T.4Nve.PP                  | 2.2x10 <sup>-8</sup> | 9.9x10 <sup>-9</sup> | 0.0146 | 3.4x10 <sup>-9</sup> | 1.2x10 <sup>-8</sup>  | 0.3829                | 3.2x10 <sup>-8</sup>  | 1.5x10 <sup>-8</sup> | 0.0188               |                      |                        |                      |        |        |                       |                      |                      |                      |        |
| T.4Nve.Sp                  | 1.6x10 <sup>-8</sup> | 1.3x10 <sup>-8</sup> | 0.1164 | 1.4x10 <sup>-8</sup> | 1.5x10 <sup>-8</sup>  | 0.1756                | 2x10 <sup>-8</sup>    | 1.8x10 <sup>-8</sup> | 0.1298               |                      |                        |                      |        |        |                       |                      |                      |                      |        |
| T.4Nve44-49d-11a-.Sp       | 2.6x10 <sup>-8</sup> | 1.1x10 <sup>-8</sup> | 0.0074 | 2.7x10 <sup>-8</sup> | 1.3x10 <sup>-8</sup>  | 0.0180                | 2.5x10 <sup>-8</sup>  | 1.3x10 <sup>-8</sup> | 0.0322               |                      |                        |                      |        |        |                       |                      |                      |                      |        |
| T.4SP24-.Th                | 2.4x10 <sup>-8</sup> | 1.2x10 <sup>-8</sup> | 0.0282 | 1.5x10 <sup>-8</sup> | 1.5x10 <sup>-8</sup>  | 0.1468                | 1.7x10 <sup>-8</sup>  | 1.3x10 <sup>-8</sup> | 0.0905               |                      |                        |                      |        |        |                       |                      |                      |                      |        |
| T.4SP24int.Th              | 1.6x10 <sup>-8</sup> | 1.3x10 <sup>-8</sup> | 0.0954 | 1.9x10 <sup>-9</sup> | 1.5x10 <sup>-8</sup>  | 0.4481                | 1.5x10 <sup>-8</sup>  | 1.4x10 <sup>-8</sup> | 0.1472               |                      |                        |                      |        |        |                       |                      |                      |                      |        |
| T.4SP69+.Th                | 2x10 <sup>-8</sup>   | 1.2x10 <sup>-8</sup> | 0.0523 | 6x10 <sup>-9</sup>   | 1.5x10 <sup>-8</sup>  | 0.3430                | 2x10 <sup>-8</sup>    | 1.3x10 <sup>-8</sup> | 0.0648               |                      |                        |                      |        |        |                       |                      |                      |                      |        |
| CD4+/CD8+ T cell           | T.DP.Th              | 0.0097               | 0.0734 | 5.4x10 <sup>-9</sup> | 9.7x10 <sup>-9</sup>  | 0.2894                | 0.2449                | 2.8x10 <sup>-9</sup> | 1.1x10 <sup>-8</sup> | 0.4005               | -3.1x10 <sup>-10</sup> | 1.1x10 <sup>-8</sup> | 0.5112 |        |                       |                      |                      |                      |        |
|                            | T.DP69+.Th           |                      |        | 3x10 <sup>-8</sup>   | 1.1x10 <sup>-8</sup>  | 0.0034                |                       | 2.1x10 <sup>-8</sup> | 1.4x10 <sup>-8</sup> | 0.0633               | 1.7x10 <sup>-8</sup>   | 1.2x10 <sup>-8</sup> | 0.0846 |        |                       |                      |                      |                      |        |
|                            | T.DPbl.Th            |                      |        | 2.5x10 <sup>-8</sup> | 1x10 <sup>-8</sup>    | 0.0056                |                       | 2.5x10 <sup>-8</sup> | 1.2x10 <sup>-8</sup> | 0.0212               | 1.8x10 <sup>-8</sup>   | 1.5x10 <sup>-8</sup> | 0.1097 |        |                       |                      |                      |                      |        |
|                            | T.DPsm.Th            |                      |        | 1.9x10 <sup>-8</sup> | 1.1x10 <sup>-8</sup>  | 0.0392                |                       | 1.4x10 <sup>-8</sup> | 1.2x10 <sup>-8</sup> | 0.1210               | 9.7x10 <sup>-9</sup>   | 1.4x10 <sup>-8</sup> | 0.2374 |        |                       |                      |                      |                      |        |

|             |                                |                      |                      |                        |                      |        |                      |                      |                       |        |                      |                        |                      |                       |                      |               |
|-------------|--------------------------------|----------------------|----------------------|------------------------|----------------------|--------|----------------------|----------------------|-----------------------|--------|----------------------|------------------------|----------------------|-----------------------|----------------------|---------------|
| CD8+ T cell | T.ISP.Th                       |                      | 2.2x10 <sup>-8</sup> | 1.1x10 <sup>-8</sup>   | <b>0.0227</b>        | 0.1352 | 2.1x10 <sup>-8</sup> | 1.4x10 <sup>-8</sup> | 0.0682                | 0.1251 | 1.1x10 <sup>-8</sup> | 1.2x10 <sup>-8</sup>   | 0.1692               |                       |                      |               |
|             | CD8.1h.LN                      | <b>0.0487</b>        | 2.8x10 <sup>-8</sup> | 1.2x10 <sup>-8</sup>   | <b>0.0090</b>        |        | 1.3x10 <sup>-8</sup> | 1.4x10 <sup>-8</sup> | 0.1716                |        | 0.1251               | 3.3x10 <sup>-8</sup>   | 1.4x10 <sup>-8</sup> | <b>0.0081</b>         |                      |               |
|             | CD8.24h.LN                     |                      | 1.9x10 <sup>-8</sup> | 9.9x10 <sup>-9</sup>   | <b>0.0261</b>        |        | 2.3x10 <sup>-8</sup> | 1.3x10 <sup>-8</sup> | <b>0.0382</b>         |        |                      | 1.1x10 <sup>-8</sup>   | 1.3x10 <sup>-8</sup> | 0.2063                |                      |               |
|             | CD8.48h.LN                     |                      | 2.1x10 <sup>-8</sup> | 1.1x10 <sup>-8</sup>   | <b>0.0239</b>        |        | 8.6x10 <sup>-9</sup> | 1.2x10 <sup>-8</sup> | 0.2363                |        |                      | 3.2x10 <sup>-8</sup>   | 1.4x10 <sup>-8</sup> | <b>0.0143</b>         |                      |               |
|             | CD8.5h.LN                      |                      | 9.3x10 <sup>-9</sup> | 1.1x10 <sup>-8</sup>   | 0.2021               |        | 2.5x10 <sup>-8</sup> | 1.5x10 <sup>-8</sup> | <b>0.0425</b>         |        |                      | -3.5x10 <sup>-9</sup>  | 1.4x10 <sup>-8</sup> | 0.6018                |                      |               |
|             | CD8.96h.LN                     |                      | 1.2x10 <sup>-8</sup> | 1.1x10 <sup>-8</sup>   | 0.1443               |        | 6.6x10 <sup>-9</sup> | 1.3x10 <sup>-8</sup> | 0.3067                |        |                      | 2x10 <sup>-8</sup>     | 1.7x10 <sup>-8</sup> | 0.1206                |                      |               |
|             | CD8.CTR.LN                     |                      | 1.3x10 <sup>-8</sup> | 1.1x10 <sup>-8</sup>   | 0.1320               |        | 1.1x10 <sup>-8</sup> | 1.4x10 <sup>-8</sup> | 0.2206                |        |                      | 1.6x10 <sup>-8</sup>   | 1.3x10 <sup>-8</sup> | 0.1107                |                      |               |
|             | T.8Eff.Sp.OT1.12hr.LisOva      |                      | 1.7x10 <sup>-8</sup> | 1.3x10 <sup>-8</sup>   | 0.0945               |        | 2.1x10 <sup>-8</sup> | 1.6x10 <sup>-8</sup> | 0.1028                |        |                      | 7.6x10 <sup>-11</sup>  | 1.4x10 <sup>-8</sup> | 0.4978                |                      |               |
|             | T.8Eff.Sp.OT1.24hr.LisOva      |                      | 1.4x10 <sup>-8</sup> | 1.3x10 <sup>-8</sup>   | 0.1308               |        | 1.3x10 <sup>-8</sup> | 1.6x10 <sup>-8</sup> | 0.2055                |        |                      | 5.2x10 <sup>-9</sup>   | 1.4x10 <sup>-8</sup> | 0.3512                |                      |               |
|             | T.8Eff.Sp.OT1.48hr.LisOva      |                      | 1x10 <sup>-8</sup>   | 1.3x10 <sup>-8</sup>   | 0.2130               |        | 1.1x10 <sup>-8</sup> | 1.5x10 <sup>-8</sup> | 0.2463                |        |                      | 4.8x10 <sup>-9</sup>   | 1.4x10 <sup>-8</sup> | 0.3658                |                      |               |
|             | T.8Eff.Sp.OT1.d10.LisOva       |                      | 1.9x10 <sup>-8</sup> | 1.2x10 <sup>-8</sup>   | 0.0589               |        | 2.2x10 <sup>-8</sup> | 1.4x10 <sup>-8</sup> | 0.0609                |        |                      | 4x10 <sup>-9</sup>     | 1.7x10 <sup>-8</sup> | 0.4083                |                      |               |
|             | T.8Eff.Sp.OT1.d15.LisOva       |                      | 1.7x10 <sup>-8</sup> | 1.1x10 <sup>-8</sup>   | 0.0644               |        | 1x10 <sup>-8</sup>   | 1.4x10 <sup>-8</sup> | 0.2314                |        |                      | 9.3x10 <sup>-9</sup>   | 1x10 <sup>-8</sup>   | 0.1874                |                      |               |
|             | T.8Eff.Sp.OT1.d15.VSV Ova      |                      | 1.2x10 <sup>-8</sup> | 1.1x10 <sup>-8</sup>   | 0.1339               |        | 1.1x10 <sup>-8</sup> | 1.4x10 <sup>-8</sup> | 0.2056                |        |                      | 1.3x10 <sup>-8</sup>   | 1.2x10 <sup>-8</sup> | 0.1495                |                      |               |
|             | T.8Eff.Sp.OT1.d5.VSV Ova       |                      | 1.1x10 <sup>-8</sup> | 1.2x10 <sup>-8</sup>   | 0.1706               |        | 2.2x10 <sup>-8</sup> | 1.4x10 <sup>-8</sup> | 0.0587                |        |                      | -5.8x10 <sup>-9</sup>  | 1.2x10 <sup>-8</sup> | 0.6801                |                      |               |
|             | T.8Eff.Sp.OT1.d6.LisOva        |                      | 2.4x10 <sup>-8</sup> | 1.3x10 <sup>-8</sup>   | <b>0.0304</b>        |        | 2.4x10 <sup>-8</sup> | 1.5x10 <sup>-8</sup> | 0.0594                |        |                      | 9.6x10 <sup>-9</sup>   | 1.6x10 <sup>-8</sup> | 0.2733                |                      |               |
|             | T.8Eff.Sp.OT1.d6.VSV Ova       |                      | 1.6x10 <sup>-8</sup> | 1.1x10 <sup>-8</sup>   | 0.0723               |        | 2x10 <sup>-8</sup>   | 1.3x10 <sup>-8</sup> | 0.0601                |        |                      | 1.6x10 <sup>-8</sup>   | 1.6x10 <sup>-8</sup> | 0.1630                |                      |               |
|             | T.8Eff.Sp.OT1.d8.LisOva        |                      | 1.8x10 <sup>-8</sup> | 1.1x10 <sup>-8</sup>   | 0.0572               |        | 2x10 <sup>-8</sup>   | 1.2x10 <sup>-8</sup> | <b>0.0498</b>         |        |                      | 5.1x10 <sup>-10</sup>  | 1.5x10 <sup>-8</sup> | 0.4864                |                      |               |
|             | T.8Eff.Sp.OT1.d8.VSV Ova       |                      | 8.1x10 <sup>-9</sup> | 1.1x10 <sup>-8</sup>   | 0.2324               |        | 1.4x10 <sup>-8</sup> | 1.3x10 <sup>-8</sup> | 0.1470                |        |                      | -2.6x10 <sup>-10</sup> | 1.6x10 <sup>-8</sup> | 0.5064                |                      |               |
|             | T.8Eff.Tbet-Sp.OT1.d6LisOVA    |                      | 3.7x10 <sup>-8</sup> | 1.4x10 <sup>-8</sup>   | <b>0.0046</b>        |        | 4.1x10 <sup>-8</sup> | 1.7x10 <sup>-8</sup> | <b>0.0094</b>         |        |                      | 3.3x10 <sup>-8</sup>   | 1.8x10 <sup>-8</sup> | <b>0.0330</b>         |                      |               |
|             | T.8Eff.Tbet+Sp.OT1.d6LisOVA    |                      | 2.8x10 <sup>-8</sup> | 1.3x10 <sup>-8</sup>   | <b>0.0139</b>        |        | 1.8x10 <sup>-8</sup> | 1.5x10 <sup>-8</sup> | 0.1132                |        |                      | 4.1x10 <sup>-8</sup>   | 2.1x10 <sup>-8</sup> | <b>0.0244</b>         |                      |               |
|             | T.8EffKLRG1+CD127-Sp.d8.LisOVA |                      | 2.3x10 <sup>-9</sup> | 9.2x10 <sup>-9</sup>   | 0.3997               |        | 6.5x10 <sup>-9</sup> | 1x10 <sup>-8</sup>   | 0.2625                |        |                      | 3x10 <sup>-10</sup>    | 1.1x10 <sup>-8</sup> | 0.4892                |                      |               |
|             | T.8Mem.LN                      |                      | 2.3x10 <sup>-8</sup> | 1.1x10 <sup>-8</sup>   | <b>0.0222</b>        |        | 1.9x10 <sup>-8</sup> | 1.4x10 <sup>-8</sup> | 0.0809                |        |                      | 2.7x10 <sup>-8</sup>   | 1.4x10 <sup>-8</sup> | <b>0.0293</b>         |                      |               |
|             | T.8Mem.Sp                      |                      | 1.9x10 <sup>-8</sup> | 1.2x10 <sup>-8</sup>   | 0.0587               |        | 1.5x10 <sup>-8</sup> | 1.4x10 <sup>-8</sup> | 0.1449                |        |                      | 1.1x10 <sup>-8</sup>   | 1.5x10 <sup>-8</sup> | 0.2255                |                      |               |
|             | T.8Mem.Sp.OT1.d100.LisOva      |                      | 2.4x10 <sup>-8</sup> | 1.2x10 <sup>-8</sup>   | <b>0.0220</b>        |        | 2.3x10 <sup>-8</sup> | 1.4x10 <sup>-8</sup> | <b>0.0453</b>         |        |                      | 3x10 <sup>-8</sup>     | 1.8x10 <sup>-8</sup> | <b>0.0423</b>         |                      |               |
|             | T.8Mem.Sp.OT1.d106.VSV Ova     |                      | 2.7x10 <sup>-8</sup> | 1.2x10 <sup>-8</sup>   | <b>0.0139</b>        |        | 2.5x10 <sup>-8</sup> | 1.4x10 <sup>-8</sup> | <b>0.0382</b>         |        |                      | 2.1x10 <sup>-8</sup>   | 1.5x10 <sup>-8</sup> | 0.0870                |                      |               |
|             | T.8Mem.Sp.OT1.d45.LisOva       |                      | 2.2x10 <sup>-8</sup> | 1.3x10 <sup>-8</sup>   | <b>0.0438</b>        |        | 2.8x10 <sup>-8</sup> | 1.6x10 <sup>-8</sup> | <b>0.0381</b>         |        |                      | 5.6x10 <sup>-9</sup>   | 1.2x10 <sup>-8</sup> | 0.3197                |                      |               |
|             | T.8Mem.Sp.OT1.d45.VSV Ova      |                      | 1.4x10 <sup>-8</sup> | 1.2x10 <sup>-8</sup>   | 0.1263               |        | 2x10 <sup>-8</sup>   | 1.5x10 <sup>-8</sup> | 0.1015                |        |                      | 1.8x10 <sup>-9</sup>   | 1.3x10 <sup>-8</sup> | 0.4455                |                      |               |
|             | T.8MemKLRG1-CD127+Sp.d8.LisOVA |                      | 2x10 <sup>-9</sup>   | 9.2x10 <sup>-9</sup>   | 0.4143               |        | 2.4x10 <sup>-9</sup> | 1.1x10 <sup>-8</sup> | 0.4144                |        |                      | 8.7x10 <sup>-9</sup>   | 1.1x10 <sup>-8</sup> | 0.2191                |                      |               |
|             | T.8Nve.LN                      |                      | 1.3x10 <sup>-8</sup> | 1.2x10 <sup>-8</sup>   | 0.1389               |        | 5.3x10 <sup>-9</sup> | 1.5x10 <sup>-8</sup> | 0.3597                |        |                      | 6.2x10 <sup>-9</sup>   | 1.3x10 <sup>-8</sup> | 0.3097                |                      |               |
|             | T.8Nve.MLN                     |                      | 2.2x10 <sup>-8</sup> | 1.2x10 <sup>-8</sup>   | <b>0.0339</b>        |        | 1.5x10 <sup>-8</sup> | 1.5x10 <sup>-8</sup> | 0.1655                |        |                      | 2x10 <sup>-8</sup>     | 1.3x10 <sup>-8</sup> | 0.0656                |                      |               |
|             | T.8Nve.PP                      |                      | 1.9x10 <sup>-8</sup> | 1x10 <sup>-8</sup>     | <b>0.0361</b>        |        | 8.2x10 <sup>-9</sup> | 1.3x10 <sup>-8</sup> | 0.2622                |        |                      | 1.7x10 <sup>-8</sup>   | 1.1x10 <sup>-8</sup> | 0.0549                |                      |               |
|             | T.8Nve.Sp                      |                      | 5.1x10 <sup>-9</sup> | 1.1x10 <sup>-8</sup>   | 0.3156               |        | 5.4x10 <sup>-9</sup> | 1.2x10 <sup>-8</sup> | 0.3287                |        |                      | 1.1x10 <sup>-9</sup>   | 1x10 <sup>-8</sup>   | 0.4563                |                      |               |
|             | T.8Nve.Sp.OT1                  |                      | 1.2x10 <sup>-8</sup> | 1.2x10 <sup>-8</sup>   | 0.1560               |        | 5.5x10 <sup>-9</sup> | 1.5x10 <sup>-8</sup> | 0.3597                |        |                      | 1.1x10 <sup>-8</sup>   | 1.2x10 <sup>-8</sup> | 0.1760                |                      |               |
|             | T.8SP24-.Th                    |                      | 9x10 <sup>-9</sup>   | 1.1x10 <sup>-8</sup>   | 0.2084               |        | 6.8x10 <sup>-9</sup> | 1.4x10 <sup>-8</sup> | 0.3188                |        |                      | 6.2x10 <sup>-10</sup>  | 1.2x10 <sup>-8</sup> | 0.4787                |                      |               |
|             | T.8SP24int.Th                  |                      | 1.3x10 <sup>-8</sup> | 1.1x10 <sup>-8</sup>   | 0.1180               |        | 8.4x10 <sup>-9</sup> | 1.4x10 <sup>-8</sup> | 0.2721                |        |                      | 9.7x10 <sup>-9</sup>   | 1.1x10 <sup>-8</sup> | 0.1875                |                      |               |
|             | T.8SP69+.Th                    |                      | 1.1x10 <sup>-8</sup> | 1.2x10 <sup>-8</sup>   | 0.1724               |        | 8.3x10 <sup>-9</sup> | 1.4x10 <sup>-8</sup> | 0.2730                |        |                      | 7.2x10 <sup>-9</sup>   | 1.2x10 <sup>-8</sup> | 0.2771                |                      |               |
|             | γδT cell                       | Tgd.Sp               | <b>0.0396</b>        | 7.2x10 <sup>-9</sup>   | 1.1x10 <sup>-8</sup> |        | 0.2625               | <b>0.0399</b>        | 3.6x10 <sup>-9</sup>  |        | 1.4x10 <sup>-8</sup> | 0.3967                 | <b>0.0982</b>        | 3x10 <sup>-9</sup>    | 1.2x10 <sup>-8</sup> | 0.4037        |
|             |                                | Tgd.Th               |                      | 3.8x10 <sup>-9</sup>   | 1.1x10 <sup>-8</sup> |        | 0.3685               |                      | 3.2x10 <sup>-9</sup>  |        | 1.4x10 <sup>-8</sup> | 0.4090                 |                      | 6.9x10 <sup>-10</sup> | 1.3x10 <sup>-8</sup> | 0.4794        |
|             |                                | Tgd.vg1+vd6-24ahi.Th |                      | -7.8x10 <sup>-10</sup> | 9.4x10 <sup>-9</sup> |        | 0.5330               |                      | -9.1x10 <sup>-9</sup> |        | 1.1x10 <sup>-8</sup> | 0.8059                 |                      | 7.5x10 <sup>-9</sup>  | 1.3x10 <sup>-8</sup> | 0.2770        |
|             |                                | Tgd.vg1+vd6-24alo.Th |                      | 1.5x10 <sup>-8</sup>   | 1x10 <sup>-8</sup>   |        | 0.0780               |                      | 1x10 <sup>-8</sup>    |        | 1.3x10 <sup>-8</sup> | 0.2057                 |                      | 2.3x10 <sup>-8</sup>  | 1.1x10 <sup>-8</sup> | <b>0.0193</b> |
|             |                                | Tgd.vg1+vd6+24ahi.Th |                      | 4x10 <sup>-9</sup>     | 1.1x10 <sup>-8</sup> |        | 0.3535               |                      | -1x10 <sup>-9</sup>   |        | 1.2x10 <sup>-8</sup> | 0.5334                 |                      | 6.3x10 <sup>-9</sup>  | 1.3x10 <sup>-8</sup> | 0.3132        |
|             |                                | Tgd.vg1+vd6+24alo.Th |                      | -1.8x10 <sup>-9</sup>  | 1x10 <sup>-8</sup>   |        | 0.5718               |                      | -6.1x10 <sup>-9</sup> |        | 1.2x10 <sup>-8</sup> | 0.7004                 |                      | -5x10 <sup>-9</sup>   | 1.3x10 <sup>-8</sup> | 0.6516        |
|             |                                | Tgd.vg2-.act.Sp      |                      | 2.1x10 <sup>-8</sup>   | 1.2x10 <sup>-8</sup> |        | <b>0.0398</b>        |                      | 1.8x10 <sup>-8</sup>  |        | 1.4x10 <sup>-8</sup> | 0.1028                 |                      | 9.3x10 <sup>-9</sup>  | 1.1x10 <sup>-8</sup> | 0.1953        |
|             |                                | Tgd.vg2-.Sp          |                      | 7.4x10 <sup>-10</sup>  | 1.2x10 <sup>-8</sup> |        | 0.4754               |                      | 9.2x10 <sup>-10</sup> |        | 1.5x10 <sup>-8</sup> | 0.4748                 |                      | 1x10 <sup>-8</sup>    | 1.6x10 <sup>-8</sup> | 0.2595        |
|             |                                | Tgd.vg2-.Sp.TCRbko   |                      | 1.8x10 <sup>-8</sup>   | 1.2x10 <sup>-8</sup> |        | 0.0742               |                      | 2.7x10 <sup>-8</sup>  |        | 1.5x10 <sup>-8</sup> | <b>0.0361</b>          |                      | 8.3x10 <sup>-9</sup>  | 1.1x10 <sup>-8</sup> | 0.2321        |

|  |              |                      |        |  |                        |                      |               |        |  |                                   |                      |               |        |  |                        |                      |               |
|--|--------------|----------------------|--------|--|------------------------|----------------------|---------------|--------|--|-----------------------------------|----------------------|---------------|--------|--|------------------------|----------------------|---------------|
|  |              | Tgd.vg2+.act.Sp      |        |  | 2.1x10 <sup>-8</sup>   | 1.2x10 <sup>-8</sup> | <b>0.0396</b> |        |  | 2.1x10 <sup>-8</sup>              | 1.4x10 <sup>-8</sup> | 0.0626        |        |  | 1.5x10 <sup>-8</sup>   | 1.2x10 <sup>-8</sup> | 0.1056        |
|  |              | Tgd.vg2+.Sp          |        |  | -1.4x10 <sup>-9</sup>  | 1.2x10 <sup>-8</sup> | 0.5491        |        |  | -2.3x10 <sup>-9</sup>             | 1.4x10 <sup>-8</sup> | 0.5652        |        |  | -5.7x10 <sup>-10</sup> | 1.4x10 <sup>-8</sup> | 0.5166        |
|  |              | Tgd.vg2+.Sp.TCRbko   |        |  | 9.3x10 <sup>-9</sup>   | 1x10 <sup>-8</sup>   | 0.1777        |        |  | 1.7x10 <sup>-9</sup>              | 1.1x10 <sup>-8</sup> | 0.0722        |        |  | -3x10 <sup>-10</sup>   | 1x10 <sup>-8</sup>   | 0.5114        |
|  |              | Tgd.vg2+24ahi.e17.Th |        |  | 8.4x10 <sup>-9</sup>   | 1.1x10 <sup>-8</sup> | 0.2153        |        |  | 9.8x10 <sup>-9</sup>              | 1.3x10 <sup>-8</sup> | 0.2160        |        |  | 7.2x10 <sup>-9</sup>   | 1.3x10 <sup>-8</sup> | 0.2833        |
|  |              | Tgd.vg2+24ahi.Th     |        |  | 2.4x10 <sup>-8</sup>   | 1.2x10 <sup>-8</sup> | <b>0.0206</b> |        |  | 1.5x10 <sup>-8</sup>              | 1.3x10 <sup>-8</sup> | 0.1272        |        |  | 3.5x10 <sup>-8</sup>   | 1.4x10 <sup>-8</sup> | <b>0.0079</b> |
|  |              | Tgd.vg2+24alo.Th     |        |  | 1.1x10 <sup>-8</sup>   | 1.1x10 <sup>-8</sup> | 0.1438        |        |  | 1.5x10 <sup>-8</sup>              | 1.2x10 <sup>-8</sup> | 0.1118        |        |  | -1.3x10 <sup>-10</sup> | 1.1x10 <sup>-8</sup> | 0.5045        |
|  |              | Tgd.vg3+24ahi.e17.Th |        |  | 1.9x10 <sup>-8</sup>   | 1.2x10 <sup>-8</sup> | <b>0.0465</b> |        |  | 1.6x10 <sup>-8</sup>              | 1.4x10 <sup>-8</sup> | 0.1352        |        |  | 1.5x10 <sup>-8</sup>   | 1.3x10 <sup>-8</sup> | 0.1218        |
|  |              | Tgd.vg3+24alo.e17.Th |        |  | 2.3x10 <sup>-8</sup>   | 1.1x10 <sup>-8</sup> | <b>0.0225</b> |        |  | 2x10 <sup>-8</sup>                | 1.3x10 <sup>-8</sup> | 0.0637        |        |  | 3.2x10 <sup>-8</sup>   | 1.3x10 <sup>-8</sup> | <b>0.0080</b> |
|  |              | Tgd.vg4+24ahi.e17.Th |        |  | 1.8x10 <sup>-8</sup>   | 1.2x10 <sup>-8</sup> | 0.0643        |        |  | 2.3x10 <sup>-8</sup>              | 1.6x10 <sup>-8</sup> | 0.0727        |        |  | -1.3x10 <sup>-9</sup>  | 1.2x10 <sup>-8</sup> | 0.5417        |
|  |              | Tgd.vg4+24alo.e17.Th |        |  | 2.8x10 <sup>-8</sup>   | 9.8x10 <sup>-9</sup> | <b>0.0020</b> |        |  | 3.8x10 <sup>-8</sup>              | 1.3x10 <sup>-8</sup> | <b>0.0017</b> |        |  | 1.2x10 <sup>-8</sup>   | 1.2x10 <sup>-8</sup> | 0.1587        |
|  |              | Tgd.vg5-.act.IEL     |        |  | -2.9x10 <sup>-9</sup>  | 9.9x10 <sup>-9</sup> | 0.6131        |        |  | 2.3x10 <sup>-9</sup>              | 1.2x10 <sup>-8</sup> | 0.4248        |        |  | -1x10 <sup>-8</sup>    | 1.1x10 <sup>-8</sup> | 0.8249        |
|  |              | Tgd.vg5-.IEL         |        |  | -5.5x10 <sup>-9</sup>  | 8.8x10 <sup>-9</sup> | 0.7335        |        |  | -3.6x10 <sup>-10</sup>            | 1.2x10 <sup>-8</sup> | 0.5126        |        |  | -1.6x10 <sup>-8</sup>  | 9.3x10 <sup>-9</sup> | 0.9557        |
|  |              | Tgd.vg5+.act.IEL     |        |  | -1.4x10 <sup>-8</sup>  | 1.1x10 <sup>-8</sup> | 0.9094        |        |  | <sup>-9</sup> .1x10 <sup>-9</sup> | 1.4x10 <sup>-8</sup> | 0.7482        |        |  | -2.6x10 <sup>-8</sup>  | 1.2x10 <sup>-8</sup> | 0.9874        |
|  |              | Tgd.vg5+.IEL         |        |  | 1.4x10 <sup>-8</sup>   | 1.1x10 <sup>-8</sup> | 0.0989        |        |  | 2.2x10 <sup>-8</sup>              | 1.3x10 <sup>-8</sup> | <b>0.0418</b> |        |  | -3.1x10 <sup>-10</sup> | 1.1x10 <sup>-8</sup> | 0.5115        |
|  |              | Tgd.vg5+24ahi.Th     |        |  | 3.5x10 <sup>-9</sup>   | 1.1x10 <sup>-8</sup> | 0.3704        |        |  | 8.1x10 <sup>-9</sup>              | 1.2x10 <sup>-8</sup> | 0.2478        |        |  | -4x10 <sup>-9</sup>    | 1.2x10 <sup>-8</sup> | 0.6299        |
|  | Prx10-T cell | preT.DN2-3.Th        | 0.2207 |  | 9.6x10 <sup>-9</sup>   | 1.2x10 <sup>-8</sup> | 0.2148        | 0.1837 |  | 8.4x10 <sup>-9</sup>              | 1.6x10 <sup>-8</sup> | 0.2953        | 0.2865 |  | 1.1x10 <sup>-8</sup>   | 1.3x10 <sup>-8</sup> | 0.1862        |
|  |              | preT.DN2.Th          |        |  | -8.1x10 <sup>-10</sup> | 1.3x10 <sup>-8</sup> | 0.5252        |        |  | 8.8x10 <sup>-9</sup>              | 1.6x10 <sup>-8</sup> | 0.2929        |        |  | -4.3x10 <sup>-9</sup>  | 1.4x10 <sup>-8</sup> | 0.6206        |
|  |              | preT.DN2A.Th         |        |  | -2x10 <sup>-9</sup>    | 1.3x10 <sup>-8</sup> | 0.5619        |        |  | 4.9x10 <sup>-10</sup>             | 1.6x10 <sup>-8</sup> | 0.4874        |        |  | -1.2x10 <sup>-9</sup>  | 1.6x10 <sup>-8</sup> | 0.5305        |
|  |              | preT.DN2B.Th         |        |  | -1.4x10 <sup>-9</sup>  | 1.1x10 <sup>-8</sup> | 0.5479        |        |  | -7.7x10 <sup>-9</sup>             | 1.5x10 <sup>-8</sup> | 0.6947        |        |  | 4x10 <sup>-9</sup>     | 1.3x10 <sup>-8</sup> | 0.3770        |
|  |              | preT.DN3-4.Th        |        |  | 6.7x10 <sup>-9</sup>   | 1.2x10 <sup>-8</sup> | 0.2909        |        |  | 8.6x10 <sup>-10</sup>             | 1.5x10 <sup>-8</sup> | 0.4765        |        |  | 1.2x10 <sup>-8</sup>   | 1.3x10 <sup>-8</sup> | 0.1894        |
|  |              | preT.DN3A.Th         |        |  | 1.6x10 <sup>-8</sup>   | 1.2x10 <sup>-8</sup> | 0.0837        |        |  | 2.1x10 <sup>-8</sup>              | 1.5x10 <sup>-8</sup> | 0.0806        |        |  | 1.2x10 <sup>-8</sup>   | 1.3x10 <sup>-8</sup> | 0.1814        |
|  |              | preT.DN3B.Th         |        |  | 2.2x10 <sup>-8</sup>   | 1.2x10 <sup>-8</sup> | <b>0.0305</b> |        |  | 2.9x10 <sup>-8</sup>              | 1.4x10 <sup>-8</sup> | <b>0.0211</b> |        |  | 2.3x10 <sup>-8</sup>   | 1.4x10 <sup>-8</sup> | <b>0.0493</b> |
|  |              | preT.ETP-2A.Th       |        |  | 3.2x10 <sup>-9</sup>   | 1x10 <sup>-8</sup>   | 0.3777        |        |  | 1.2x10 <sup>-9</sup>              | 1.2x10 <sup>-8</sup> | 0.4624        |        |  | 9.7x10 <sup>-9</sup>   | 1.2x10 <sup>-8</sup> | 0.2117        |
|  |              | preT.ETP.Th          |        |  | 1.4x10 <sup>-8</sup>   | 1.1x10 <sup>-8</sup> | 0.1098        |        |  | 1.2x10 <sup>-8</sup>              | 1.2x10 <sup>-8</sup> | 0.1604        |        |  | 1.7x10 <sup>-8</sup>   | 1.3x10 <sup>-8</sup> | 0.0998        |

-- Unable to be evaluated due to small sample size or low trait heritability.

**Supplementary Table 6. Genetic correlations, 95% confidence intervals and p values for association between glioma, autoimmune diseases, atopic traits, and complete blood count (CBC) values, bold indicates p<0.05**

| Trait                                      | All Glioma                 |               |                                     |                   | GB                         |               |                        |                   | Non-GB                     |               |                        |                   |
|--------------------------------------------|----------------------------|---------------|-------------------------------------|-------------------|----------------------------|---------------|------------------------|-------------------|----------------------------|---------------|------------------------|-------------------|
|                                            | r <sub>g</sub> (95% CI)    | P             | P <sub>corrected</sub> <sup>a</sup> | GC intercept (SE) | r <sub>g</sub> (95% CI)    | P             | P <sub>corrected</sub> | GC intercept (SE) | r <sub>g</sub> (95% CI)    | P             | P <sub>corrected</sub> | GC intercept (SE) |
| <b>Auto-immune diseases</b>                |                            |               |                                     |                   |                            |               |                        |                   |                            |               |                        |                   |
| Celiac disease                             | -0.14 (-0.36-0.08)         | 0.2046        | 0.6462                              | 0.03 (0.03)       | -0.03 (-0.34-0.28)         | 0.8617        | 1.0000                 | 0.02 (0.02)       | <b>-0.32 (-0.57--0.07)</b> | <b>0.0109</b> | 0.2339                 | 0.03 (0.03)       |
| Crohn's disease                            | -0.12 (-0.41-0.17)         | 0.4210        | 0.8256                              | 0.00 (0.00)       | -0.15 (-0.55-0.25)         | 0.4654        | 1.0000                 | 0.01 (0.01)       | -0.05 (-0.40-0.30)         | 0.7797        | 1.0000                 | -0.01 (-0.01)     |
| Lupus                                      | -0.13 (-0.32-0.06)         | 0.1899        | 0.6462                              | 0.02 (0.02)       | -0.18 (-0.44-0.08)         | 0.1789        | 0.8782                 | 0.02 (0.02)       | -0.08 (-0.31-0.14)         | 0.4754        | 0.9757                 | 0.01 (0.01)       |
| Multiple sclerosis                         | -0.29 (-0.67-0.09)         | 0.1361        | 0.6462                              | 0.07 (0.07)       | -0.33 (-0.85-0.19)         | 0.2198        | 0.8782                 | 0.05 (0.05)       | -0.35 (-0.78-0.09)         | 0.1156        | 0.6901                 | 0.06 (0.06)       |
| Primary biliary cirrhosis                  | <b>-0.26 (-0.48--0.04)</b> | <b>0.0228</b> | 0.6371                              | 0.08 (0.08)       | <b>-0.29 (-0.56--0.02)</b> | <b>0.0344</b> | 0.8782                 | 0.06 (0.06)       | -0.19 (-0.42-0.04)         | 0.1009        | 0.6901                 | 0.06 (0.06)       |
| Psoriasis                                  | -0.25 (-0.59-0.09)         | 0.1476        | 0.6462                              | 0.01 (0.01)       | -0.31 (-0.70-0.08)         | 0.1161        | 0.8782                 | 0.01 (0.01)       | -0.24 (-0.67-0.19)         | 0.2728        | 0.8097                 | 0.01 (0.01)       |
| Rheumatoid arthritis                       | -0.24 (-0.60-0.13)         | 0.1998        | 0.6462                              | 0.01 (0.01)       | -0.23 (-0.66-0.21)         | 0.3112        | 0.8782                 | 0.01 (0.01)       | -0.15 (-0.58-0.28)         | 0.4992        | 0.9757                 | 0.00 (0.00)       |
| Type 1 diabetes                            | -0.03 (-0.40-0.35)         | 0.8913        | 0.9982                              | -0.00 (-0.00)     | -0.10 (-0.57-0.38)         | 0.6881        | 1.0000                 | 0.00 (0.00)       | -0.01 (-0.44-0.43)         | 0.9816        | 1.0000                 | -0.00 (-0.00)     |
| Ulcerative colitis                         | -0.03 (-0.17-0.10)         | 0.6122        | 0.8855                              | 0.02 (0.02)       | -0.02 (-0.21-0.17)         | 0.8418        | 1.0000                 | 0.01 (0.01)       | -0.01 (-0.17-0.14)         | 0.8739        | 1.0000                 | 0.02 (0.02)       |
| <b>Atopic diseases</b>                     |                            |               |                                     |                   |                            |               |                        |                   |                            |               |                        |                   |
| Asthma                                     | -0.24 (-0.59-0.12)         | 0.1953        | 0.6462                              | 0.00 (0.00)       | -0.23 (-0.67-0.21)         | 0.3017        | 0.8782                 | 0.00 (0.00)       | -0.13 (-0.52-0.25)         | 0.4954        | 0.9757                 | -0.00 (-0.00)     |
| Eczema                                     | -0.16 (-0.39-0.07)         | 0.1656        | 0.6462                              | 0.00 (0.00)       | -0.22 (-0.53-0.08)         | 0.1535        | 0.8782                 | 0.00 (0.00)       | -0.14 (-0.40-0.11)         | 0.2685        | 0.8097                 | 0.00 (0.00)       |
| Hayfever                                   | 0.01 (-0.14-0.16)          | 0.8860        | 0.9982                              | -0.01 (-0.01)     | -0.09 (-0.28-0.09)         | 0.3229        | 0.8782                 | 0.00 (0.00)       | 0.07 (-0.12-0.26)          | 0.4840        | 0.9757                 | -0.00 (-0.00)     |
| <b>Blood count traits</b>                  |                            |               |                                     |                   |                            |               |                        |                   |                            |               |                        |                   |
| Basophil count                             | 0.01 (-0.14-0.16)          | 0.8771        | 0.9982                              | 0.00 (0.00)       | -0.04 (-0.23-0.15)         | 0.6786        | 1.0000                 | 0.00 (0.00)       | 0.01 (-0.16-0.18)          | 0.9100        | 1.0000                 | 0.01 (0.01)       |
| Basophil percentage                        | -0.05 (-0.18-0.07)         | 0.3832        | 0.8239                              | 0.00 (0.00)       | -0.13 (-0.28-0.02)         | 0.0978        | 0.8782                 | 0.00 (0.00)       | -0.00 (-0.14-0.14)         | 0.9744        | 1.0000                 | -0.00 (-0.00)     |
| Eosinophil count                           | 0.01 (-0.08-0.10)          | 0.9060        | 0.9982                              | -0.00 (-0.00)     | 0.01 (-0.09-0.10)          | 0.9176        | 1.0000                 | -0.01 (-0.01)     | 0.00 (-0.11-0.11)          | 0.9438        | 1.0000                 | -0.00 (-0.00)     |
| Eosinophil percentage                      | 0.02 (-0.07-0.11)          | 0.6137        | 0.8855                              | -0.00 (-0.00)     | 0.03 (-0.07-0.13)          | 0.5791        | 1.0000                 | -0.01 (-0.01)     | 0.01 (-0.10-0.11)          | 0.8738        | 1.0000                 | 0.00 (0.00)       |
| Haematocrit percentage                     | 0.03 (-0.07-0.14)          | 0.5207        | 0.8844                              | 0.01 (0.01)       | 0.06 (-0.07-0.19)          | 0.3472        | 0.8782                 | 0.00 (0.00)       | -0.00 (-0.11-0.11)         | 0.9751        | 1.0000                 | 0.00 (0.00)       |
| Haemoglobin concentration                  | 0.05 (-0.05-0.14)          | 0.3696        | 0.8239                              | 0.00 (0.00)       | 0.06 (-0.06-0.18)          | 0.3092        | 0.8782                 | 0.00 (0.00)       | 0.02 (-0.09-0.13)          | 0.6921        | 1.0000                 | 0.00 (0.00)       |
| High light scatter reticulocyte count      | -0.02 (-0.12-0.07)         | 0.6235        | 0.8855                              | -0.00 (-0.00)     | -0.00 (-0.13-0.12)         | 0.9687        | 1.0000                 | -0.01 (-0.01)     | -0.03 (-0.14-0.08)         | 0.6074        | 1.0000                 | -0.00 (-0.00)     |
| High light scatter reticulocyte percentage | -0.03 (-0.13-0.07)         | 0.5387        | 0.8844                              | -0.00 (-0.00)     | -0.01 (-0.14-0.11)         | 0.8230        | 1.0000                 | -0.00 (-0.00)     | -0.03 (-0.13-0.08)         | 0.6350        | 1.0000                 | -0.00 (-0.00)     |
| Immature reticulocyte fraction             | -0.07 (-0.17-0.03)         | 0.1656        | 0.6462                              | 0.00 (0.00)       | -0.04 (-0.16-0.09)         | 0.5787        | 1.0000                 | -0.00 (-0.00)     | -0.08 (-0.20-0.03)         | 0.1676        | 0.7349                 | 0.00 (0.00)       |
| Lymphocyte count                           | -0.05 (-0.14-0.03)         | 0.2261        | 0.6482                              | 0.00 (0.00)       | -0.05 (-0.15-0.06)         | 0.3766        | 0.8997                 | -0.00 (-0.00)     | -0.08 (-0.18-0.02)         | 0.1133        | 0.6901                 | 0.00 (0.00)       |
| Lymphocyte percentage                      | <b>-0.10 (-0.20--0.00)</b> | <b>0.0445</b> | 0.6371                              | 0.01 (0.01)       | -0.09 (-0.22-0.03)         | 0.1546        | 0.8782                 | 0.01 (0.01)       | <b>-0.11 (-0.22--0.01)</b> | <b>0.0312</b> | 0.4478                 | 0.01 (0.01)       |
| Mean corpuscular haemoglobin               | 0.01 (-0.08-0.10)          | 0.8624        | 0.9982                              | 0.01 (0.01)       | -0.02 (-0.14-0.11)         | 0.7952        | 1.0000                 | 0.02 (0.02)       | 0.03 (-0.06-0.13)          | 0.4877        | 0.9757                 | 0.01 (0.01)       |
| Mean corpuscular haemoglobin concentration | 0.04 (-0.08-0.16)          | 0.5514        | 0.8844                              | -0.00 (-0.00)     | -0.02 (-0.17-0.14)         | 0.8317        | 1.0000                 | 0.00 (0.00)       | 0.09 (-0.04-0.23)          | 0.1709        | 0.7349                 | -0.01 (-0.01)     |
| Mean corpuscular volume                    | -0.00 (-0.10-0.09)         | 0.9286        | 0.9982                              | 0.02 (0.02)       | -0.03 (-0.15-0.10)         | 0.6645        | 1.0000                 | 0.02 (0.02)       | 0.02 (-0.08-0.12)          | 0.6895        | 1.0000                 | 0.01 (0.01)       |
| Mean platelet (thrombocyte) volume         | <b>-0.09 (-0.18--0.01)</b> | <b>0.0337</b> | 0.6371                              | 0.01 (0.01)       | -0.06 (-0.18-0.05)         | 0.2863        | 0.8782                 | 0.00 (0.00)       | <b>-0.12 (-0.20--0.03)</b> | <b>0.0096</b> | 0.2339                 | 0.01 (0.01)       |
| Mean reticulocyte volume                   | -0.00 (-0.10-0.09)         | 0.9258        | 0.9982                              | 0.01 (0.01)       | 0.01 (-0.11-0.13)          | 0.8784        | 1.0000                 | 0.01 (0.01)       | -0.02 (-0.12-0.09)         | 0.7625        | 1.0000                 | 0.01 (0.01)       |
| Mean spheroid cell volume                  | -0.04 (-0.13-0.05)         | 0.3754        | 0.8239                              | 0.02 (0.02)       | -0.03 (-0.15-0.09)         | 0.6304        | 1.0000                 | 0.01 (0.01)       | -0.05 (-0.14-0.04)         | 0.2898        | 0.8097                 | 0.01 (0.01)       |
| Monocyte count                             | 0.08 (-0.01-0.18)          | 0.0949        | 0.6462                              | -0.01 (-0.01)     | 0.08 (-0.03-0.19)          | 0.1525        | 0.8782                 | -0.01 (-0.01)     | 0.06 (-0.05-0.16)          | 0.3013        | 0.8097                 | -0.01 (-0.01)     |
| Monocyte percentage                        | 0.08 (-0.02-0.18)          | 0.1144        | 0.6462                              | -0.01 (-0.01)     | 0.07 (-0.04-0.18)          | 0.2111        | 0.8782                 | -0.00 (-0.00)     | 0.07 (-0.04-0.18)          | 0.2245        | 0.8097                 | -0.01 (-0.01)     |
| Neutrophil count                           | 0.04 (-0.06-0.15)          | 0.4224        | 0.8256                              | -0.01 (-0.01)     | 0.05 (-0.08-0.18)          | 0.4454        | 1.0000                 | -0.01 (-0.01)     | 0.02 (-0.09-0.14)          | 0.6724        | 1.0000                 | -0.01 (-0.01)     |
| Neutrophil percentage                      | 0.07 (-0.04-0.17)          | 0.2104        | 0.6462                              | -0.01 (-0.01)     | 0.06 (-0.07-0.20)          | 0.3458        | 0.8782                 | -0.00 (-0.00)     | 0.08 (-0.02-0.19)          | 0.1284        | 0.6901                 | -0.01 (-0.01)     |



|                                                 |                    |        |        |               |                    |        |        |               |                    |        |        |               |
|-------------------------------------------------|--------------------|--------|--------|---------------|--------------------|--------|--------|---------------|--------------------|--------|--------|---------------|
| Platelet count                                  | 0.05 (-0.04-0.14)  | 0.3043 | 0.8178 | -0.02 (-0.02) | 0.04 (-0.09-0.16)  | 0.5404 | 1.0000 | -0.01 (-0.01) | 0.04 (-0.05-0.14)  | 0.3711 | 0.9387 | -0.02 (-0.02) |
| Platelet crit                                   | -0.01 (-0.10-0.08) | 0.8489 | 0.9982 | -0.02 (-0.02) | -0.01 (-0.13-0.11) | 0.8762 | 1.0000 | -0.01 (-0.01) | -0.02 (-0.12-0.08) | 0.7119 | 1.0000 | -0.02 (-0.02) |
| Platelet distribution width                     | -0.03 (-0.15-0.08) | 0.5553 | 0.8844 | -0.00 (-0.00) | 0.00 (-0.13-0.14)  | 0.9548 | 1.0000 | -0.01 (-0.01) | -0.07 (-0.19-0.05) | 0.2288 | 0.8097 | 0.01 (0.01)   |
| Red blood cell (erythrocyte) count              | 0.03 (-0.06-0.12)  | 0.5040 | 0.8844 | -0.01 (-0.01) | 0.06 (-0.05-0.18)  | 0.3025 | 0.8782 | -0.01 (-0.01) | -0.01 (-0.10-0.09) | 0.8773 | 1.0000 | -0.00 (-0.00) |
| Red blood cell (erythrocyte) distribution width | -0.04 (-0.12-0.04) | 0.3376 | 0.8239 | 0.00 (0.00)   | 0.01 (-0.10-0.12)  | 0.8185 | 1.0000 | -0.01 (-0.01) | -0.09 (-0.19-0.01) | 0.0807 | 0.6901 | 0.01 (0.01)   |
| Reticulocyte count                              | -0.00 (-0.10-0.10) | 0.9717 | 1.0000 | -0.00 (-0.00) | 0.01 (-0.12-0.13)  | 0.9248 | 1.0000 | -0.00 (-0.00) | 0.00 (-0.11-0.11)  | 0.9780 | 1.0000 | -0.00 (-0.00) |
| Reticulocyte percentage                         | -0.01 (-0.11-0.09) | 0.8558 | 0.9982 | -0.00 (-0.00) | -0.01 (-0.13-0.12) | 0.8988 | 1.0000 | -0.00 (-0.00) | 0.00 (-0.10-0.11)  | 0.9442 | 1.0000 | -0.00 (-0.00) |
| White blood cell (leukocyte) count              | 0.02 (-0.07-0.11)  | 0.6384 | 0.8855 | -0.01 (-0.01) | 0.03 (-0.09-0.14)  | 0.6484 | 1.0000 | -0.01 (-0.01) | -0.00 (-0.11-0.10) | 0.9679 | 1.0000 | -0.00 (-0.00) |

-- Unable to be evaluated due to small sample size or low trait heritability.

---

<sup>a</sup> Adjusted for 33 tests

**Supplementary Table 7. Genetic correlations, 95% confidence intervals and p values for association between glioma, autoimmune diseases, atopic traits, based on LD score reference panel that includes HLA region, bold indicates p<0.05**

| Trait                       | All Glioma                 |               |                                     |                   | GB                      |        |                        |                   | Non-GB                     |               |                        |                   |
|-----------------------------|----------------------------|---------------|-------------------------------------|-------------------|-------------------------|--------|------------------------|-------------------|----------------------------|---------------|------------------------|-------------------|
|                             | r <sub>g</sub> (95% CI)    | P             | P <sub>corrected</sub> <sup>a</sup> | GC intercept (SE) | r <sub>g</sub> (95% CI) | P      | P <sub>corrected</sub> | GC intercept (SE) | r <sub>g</sub> (95% CI)    | P             | P <sub>corrected</sub> | GC intercept (SE) |
| <b>Auto-immune diseases</b> |                            |               |                                     |                   |                         |        |                        |                   |                            |               |                        |                   |
| Celiac disease              | -0.14 (-0.36-0.08)         | 0.2046        | 0.4207                              | 0.03 (0.03)       | -0.03 (-0.34-0.28)      | 0.8617 | 0.9664                 | 0.02 (0.02)       | <b>-0.32 (-0.57--0.07)</b> | <b>0.0109</b> | 0.1306                 | 0.03 (0.03)       |
| Crohn's disease             | -0.17 (-0.47-0.14)         | 0.2829        | 0.4207                              | 0.00 (0.00)       | -0.18 (-0.57-0.22)      | 0.3757 | 0.5192                 | 0.01 (0.01)       | -0.12 (-0.47-0.23)         | 0.5057        | 0.7812                 | -0.00 (-0.00)     |
| Lupus                       | <b>-0.22 (-0.42--0.02)</b> | <b>0.0309</b> | 0.3680                              | 0.03 (0.03)       | -0.22 (-0.46-0.03)      | 0.0826 | 0.4658                 | 0.02 (0.02)       | -0.23 (-0.58-0.13)         | 0.2156        | 0.7812                 | 0.02 (0.02)       |
| Multiple sclerosis          | -0.24 (-0.51-0.04)         | 0.0992        | 0.3968                              | 0.07 (0.07)       | -0.27 (-0.65-0.12)      | 0.1741 | 0.4658                 | 0.05 (0.05)       | -0.29 (-0.59-0.02)         | 0.0637        | 0.3820                 | 0.06 (0.06)       |
| Primary biliary cirrhosis   | -0.20 (-0.40-0.01)         | 0.0613        | 0.3680                              | 0.08 (0.08)       | -0.24 (-0.49-0.00)      | 0.0523 | 0.4658                 | 0.06 (0.06)       | -0.11 (-0.38-0.15)         | 0.4138        | 0.7812                 | 0.05 (0.05)       |
| Psoriasis                   | -0.20 (-0.52-0.13)         | 0.2361        | 0.4207                              | 0.01 (0.01)       | -0.28 (-0.67-0.10)      | 0.1513 | 0.4658                 | 0.01 (0.01)       | -0.16 (-0.55-0.23)         | 0.4242        | 0.7812                 | 0.01 (0.01)       |
| Rheumatoid arthritis        | -0.17 (-0.49-0.15)         | 0.3041        | 0.4207                              | 0.01 (0.01)       | -0.17 (-0.57-0.22)      | 0.3894 | 0.5192                 | 0.01 (0.01)       | -0.08 (-0.46-0.31)         | 0.6981        | 0.7884                 | 0.00 (0.00)       |
| Type 1 diabetes             | 0.10 (-0.24-0.44)          | 0.5656        | 0.6443                              | -0.00 (-0.00)     | 0.01 (-0.43-0.45)       | 0.9664 | 0.9664                 | -0.00 (-0.00)     | 0.15 (-0.31-0.61)          | 0.5208        | 0.7812                 | -0.00 (-0.00)     |
| Ulcerative colitis          | -0.04 (-0.16-0.09)         | 0.5906        | 0.6443                              | 0.02 (0.02)       | -0.01 (-0.20-0.17)      | 0.9046 | 0.9664                 | 0.01 (0.01)       | -0.02 (-0.18-0.13)         | 0.7739        | 0.7884                 | 0.02 (0.02)       |
| <b>Atopic diseases</b>      |                            |               |                                     |                   |                         |        |                        |                   |                            |               |                        |                   |
| Asthma                      | -0.18 (-0.52-0.17)         | 0.3155        | 0.4207                              | 0.00 (0.00)       | -0.21 (-0.63-0.22)      | 0.3418 | 0.5192                 | 0.00 (0.00)       | -0.05 (-0.44-0.33)         | 0.7884        | 0.7884                 | -0.00 (-0.00)     |
| Eczema                      | -0.13 (-0.35-0.10)         | 0.2641        | 0.4207                              | 0.00 (0.00)       | -0.20 (-0.50-0.10)      | 0.1941 | 0.4658                 | 0.00 (0.00)       | -0.10 (-0.37-0.17)         | 0.4815        | 0.7812                 | 0.00 (0.00)       |
| Hayfever                    | -0.01 (-0.15-0.14)         | 0.9303        | 0.9303                              | -0.00 (-0.00)     | -0.10 (-0.29-0.09)      | 0.2914 | 0.5192                 | 0.00 (0.00)       | 0.04 (-0.14-0.22)          | 0.6757        | 0.7884                 | -0.00 (-0.00)     |

-- Unable to be evaluated due to small sample size or low trait heritability.

<sup>a</sup> Adjusted for 12 tests

## References

1. Melin, B.S., et al., *Genome-wide association study of glioma subtypes identifies specific differences in genetic susceptibility to glioblastoma and non-glioblastoma tumors*. Nature Genetics, 2017. **49**(5): p. 789-+.
2. Shete, S., et al., *Genome-wide association study identifies five susceptibility loci for glioma*. Nature Genetics, 2009. **41**(8): p. 899-904.
3. Kinnnersley, B., et al., *Genome-wide association study identifies multiple susceptibility loci for glioma*. Nature communications, 2015. **6**: p. 8559.
4. Wrensch, M., et al., *Variants in the CDKN2B and RTEL1 regions are associated with high-grade glioma susceptibility*. Nature Genetics, 2009. **41**(8): p. 905-8.
5. Rajaraman, P., et al., *Genome-wide association study of glioma and meta-analysis*. Human Genetics 2012. **131**(12): p. 1877-88.
6. Sanson, M., et al., *Chromosome 7p11.2 (EGFR) variation influences glioma risk*. Human molecular genetics, 2011. **20**(14): p. 2897-904.
7. Jenkins, R.B., et al., *Distinct germ line polymorphisms underlie glioma morphologic heterogeneity*. Cancer Genetics, 2011. **204**(1): p. 13-8.
8. Eckel-Passow, J.E., et al., *Glioma Groups Based on 1p/19q, IDH, and TERT Promoter Mutations in Tumors*. New England Journal of Medicine, 2015. **372**(26): p. 2499-508.
9. Hunter, D.J., et al., *A genome-wide association study identifies alleles in FGFR2 associated with risk of sporadic postmenopausal breast cancer*. Nature genetics, 2007. **39**(7): p. 870-4.
10. Yeager, M., et al., *Identification of a new prostate cancer susceptibility locus on chromosome 8q24*. Nature genetics, 2009. **41**(10): p. 1055-7.
11. Alavanja, M.C., et al., *The Agricultural Health Study*. Environmental health perspectives, 1996. **104**(4): p. 362-9.
12. Larsson, S.C., et al., *Overall obesity, abdominal adiposity, diabetes and cigarette smoking in relation to the risk of pancreatic cancer in two Swedish population-based cohorts*. British journal of cancer, 2005. **93**(11): p. 1310-1315.
13. Malmer, B., et al., *GLIOGENE an International Consortium to Understand Familial Glioma*. Cancer Epidemiology, Biomarkers and Prevention, 2007. **16**(9): p. 1730-4.
14. Rimm, E.B., et al., *Effectiveness of various mailing strategies among nonrespondents in a prospective cohort study*. American Journal of Epidemiology, 1990. **131**(6): p. 1068-71.
15. Cardis, E., et al., *The INTERPHONE study: design, epidemiological methods, and description of the study population*. European journal of epidemiology, 2007. **22**(9): p. 647-64.
16. Giles, G.G. and D.R. English, *The Melbourne Collaborative Cohort Study*. IARC Scientific Publications, 2002. **156**: p. 69-70.
17. Kolonel, L.N., et al., *A multiethnic cohort in Hawaii and Los Angeles: baseline characteristics*. American Journal of Epidemiology, 2000. **151**(4): p. 346-57.
18. Belanger, C.F., et al., *The nurses' health study*. American Journal of Nursing, 1978. **78**(6): p. 1039-40.
19. Ruder, A.M., et al., *The Upper Midwest Health Study: a case-control study of primary intracranial gliomas in farm and rural residents*. Journal of agricultural safety and health, 2006. **12**(4): p. 255-74.
20. Hallmans, G., et al., *Cardiovascular disease and diabetes in the Northern Sweden Health and Disease Study Cohort - evaluation of risk factors and their interactions*. Scandinavian journal of public health. Supplement, 2003. **61**: p. 18-24.
21. Kato, I., et al., *Prospective study of diet and female colorectal cancer: the New York University Women's Health Study*. Nutrition and cancer, 1997. **28**(3): p. 276-81.
22. Hennekens, C.H. and K. Eberlein, *A randomized trial of aspirin and beta-carotene among U.S. physicians*. Preventive medicine, 1985. **14**(2): p. 165-8.
23. Flood, A., et al., *Carbohydrate, glycemic index, and glycemic load and colorectal adenomas in the Prostate, Lung, Colorectal, and Ovarian Screening Study*. American journal of clinical nutrition, 2006. **84**(5): p. 1184-92.
24. Zheng, W., et al., *The Shanghai Women's Health Study: rationale, study design, and baseline characteristics*. American Journal of Epidemiology, 2005. **162**(11): p. 1123-31.
25. Cai, H., et al., *Dietary patterns and their correlates among middle-aged and elderly Chinese men: a report from the Shanghai Men's Health Study*. The British journal of nutrition, 2007. **98**(5): p. 1006-13.
26. White, E., et al., *VITamins And Lifestyle cohort study: study design and characteristics of supplement users*. American Journal of Epidemiology, 2004. **159**(1): p. 83-93.
27. Buring, J. and C. Hennekens, *The Women's Health Study: summary of the study design*. Journal of Myocardial Ischemia, 1992(4): p. 27-29.
28. Buring, J. and C. Hennekens, *The Women's Health Study: rationale and background*. Journal of Myocardial Ischemia, 1992(4): p. 30-40.
29. Wichmann, H.E., C. Gieger, and T. Illig, *KORA-gen--resource for population genetics, controls and a broad spectrum of disease phenotypes*. Gesundheitswesen, 2005. **67 Suppl 1**: p. S26-30.
30. Krawczak, M., et al., *PopGen: population-based recruitment of patients and controls for the analysis of complex genotype-phenotype relationships*. Community genetics, 2006. **9**(1): p. 55-61.
31. Schmermund, A., et al., *Assessment of clinically silent atherosclerotic disease and established and novel risk factors for predicting myocardial infarction and cardiac death in healthy middle-aged subjects: rationale and design of the Heinz Nixdorf RECALL Study*. Risk Factors, Evaluation of Coronary Calcium and Lifestyle. American heart journal, 2002. **144**(2): p. 212-8.
32. Hercberg, S., et al., *The SU.VI.MAX Study: a randomized, placebo-controlled trial of the health effects of antioxidant vitamins and minerals*. Archives of internal medicine, 2004. **164**(21): p. 2335-42.
33. Dubois, P.C., et al., *Multiple common variants for celiac disease influencing immune gene expression*. Nature Genetics, 2010. **42**(4): p. 295-302.
34. Spinell, T., et al., *The association between coeliac disease and periodontitis: Results from NHANES 2009-2012*. Journal of Clinical Periodontology, 2018. **45**(3): p. 303-310.
35. Abbott, L., et al. *Neale Lab - UK Biobank GWAS*. 2018; Available from: <http://www.nealelab.is/uk-biobank/>.
36. Bentham, J., et al., *Genetic association analyses implicate aberrant regulation of innate and adaptive immunity genes in the pathogenesis of systemic lupus erythematosus*. Nature Genetics, 2015. **47**(12): p. 1457-1464.
37. Dall'Era, M., et al., *The Incidence and Prevalence of Systemic Lupus Erythematosus in San Francisco County, California: The California Lupus Surveillance Project*. Arthritis & rheumatology (Hoboken, N.J.), 2017. **69**(10): p. 1996-2005.
38. International Multiple Sclerosis Genetics, C., et al., *Genetic risk and a primary role for cell-mediated immune mechanisms in multiple sclerosis*. Nature, 2011. **476**(7359): p. 214-9.
39. Dilokthornsakul, P., et al., *Multiple sclerosis prevalence in the United States commercially insured population*. Neurology, 2016. **86**(11): p. 1014-21.
40. Cordell, H.J., et al., *International genome-wide meta-analysis identifies new primary biliary cirrhosis risk loci and targetable pathogenic pathways*. Nature communications, 2015. **6**: p. 8019.
41. Lu, M., et al., *Increasing Prevalence of Primary Biliary Cholangitis and Reduced Mortality With Treatment*. Clinical Gastroenterology and Hepatology, 2018. **16**(8): p. 1342-1350 e1.
42. Helmick, C.G., et al., *Prevalence of psoriasis among adults in the U.S.: 2003-2006 and 2009-2010 National Health and Nutrition Examination Surveys*. American journal of preventive medicine, 2014. **47**(1): p. 37-45.
43. Hunter, T.M., et al., *Prevalence of rheumatoid arthritis in the United States adult population in healthcare claims databases, 2004-2014*. Rheumatology International, 2017. **37**(9): p. 1551-1557.
44. Xu, G., et al., *Prevalence of diagnosed type 1 and type 2 diabetes among US adults in 2016 and 2017: population based study*. BMJ (Clinical research ed.), 2018. **362**: p. k1497.
45. Jostins, L., et al., *Host-microbe interactions have shaped the genetic architecture of inflammatory bowel disease*. Nature, 2012. **491**(7422): p. 119-24.

46. Ng, S.C., et al., *Worldwide incidence and prevalence of inflammatory bowel disease in the 21st century: a systematic review of population-based studies*. *Lancet*, 2018. **390**(10114): p. 2769-2778.
47. Blackwell, D. and M. Villarroel. *Tables of Summary Health Statistics for U.S. Adults: 2017 National Health Interview Survey*. . 2018 October 10, 2019]; Available from: <http://www.cdc.gov/nchs/nhis/SHS/tables.htm>.
48. Wei, J. and J.S. Ji, *Association of Serum Vitamins with Eczema in US Adults (NHANES 2005–2006)*. *Dermatology*, 2019.
